# Supplementary material for: The MYB-related transcription factor MYPOP acts as a selective regulator of cancer cell growth
Source: Research Square preprint supplement (doi:10.21203/rs.3.rs-3673301/v1), 2024-03-05
Supplement: Supplementary file 1 [file 3550219f72372701af286d9c.xlsx]

## Sheet: Supplementary Table 3
Supplementary Table 3: HeLa RNA-Seq 24h post mRNA transfection
ENSEMBL ID	Gene symbol	Log2 fold change	P-value	Adjusted p-value
ENSG00000168334	XIRP1	12.5064	1.37336e-67	1.69396e-65
ENSG00000212724	KRTAP2-3	11.1955	4.22626e-22	8.15154e-21
ENSG00000149968	MMP3	10.7256	4.24237e-16	5.37654e-15
ENSG00000197632	SERPINB2	9.98893	5.12492e-18	7.55282e-17
ENSG00000130701	RBBP8NL	9.96447	6.31687e-18	9.23914e-17
ENSG00000212900	KRTAP3-2	9.7183	4.19862e-22	8.10631e-21
ENSG00000212899	KRTAP3-3	9.37469	2.44942e-12	2.24801e-11
ENSG00000221826	PSG3	9.19074	1.60504e-15	1.92695e-14
ENSG00000184350	MRGPRE	9.18113	6.25961e-12	5.56043e-11
ENSG00000099139	PCSK5	8.77627	0	0
ENSG00000178789	CD300LB	8.46842	6.49726e-10	4.70881e-09
ENSG00000162892	IL24	8.32212	0	0
ENSG00000213416	KRTAP4-12	8.29449	8.90442e-10	6.35116e-09
ENSG00000159409	CELF3	8.25514	1.20758e-09	8.49432e-09
ENSG00000248751	RP1-130H16.18	8.13597	3.24583e-09	2.18476e-08
ENSG00000123584	MAGEA9	8.06448	3.36839e-09	2.26411e-08
ENSG00000237265	RP11-402P6.9	8.00958	3.72997e-09	2.49934e-08
ENSG00000115009	CCL20	7.9161	6.68647e-12	5.9206e-11
ENSG00000255398	HCAR3	7.62904	3.47254e-08	2.09553e-07
ENSG00000104879	CKM	7.61763	3.25585e-08	1.96968e-07
ENSG00000261089	RP11-435I10.3	7.60524	3.28518e-08	1.98619e-07
ENSG00000179023	KLHDC7A	7.50929	5.40384e-08	3.18167e-07
ENSG00000050628	PTGER3	7.39315	1.15282e-07	6.48962e-07
ENSG00000166104	RP11-299H22.3	7.34068	1.24812e-07	6.99358e-07
ENSG00000166670	MMP10	7.33834	1.04327e-07	5.89867e-07
ENSG00000281991	TMEM265	7.28809	1.65235e-07	9.11095e-07
ENSG00000211891	IGHE	7.28589	1.3343e-07	7.43991e-07
ENSG00000262406	MMP12	7.28541	3.13609e-18	4.67516e-17
ENSG00000005001	PRSS22	7.20111	1.92005e-07	1.04915e-06
ENSG00000165799	RNASE7	6.97307	5.33308e-07	2.74376e-06
ENSG00000153495	TEX29	6.94656	7.16901e-12	6.3305e-11
ENSG00000205108	FAM205A	6.90729	7.31551e-07	3.70366e-06
ENSG00000232133	IMPDH1P10	6.88666	1.06569e-06	5.27264e-06
ENSG00000186810	CXCR3	6.8794	8.06683e-07	4.06279e-06
ENSG00000283599	RP11-402P6.15	6.84017	9.76604e-07	4.86668e-06
ENSG00000196611	MMP1	6.73014	5.34302e-72	7.55237e-70
ENSG00000283268	RP11-727F15.14	6.71755	1.54562e-06	7.49024e-06
ENSG00000237417	XRCC6P1	6.65796	6.07782e-11	4.88707e-10
ENSG00000136689	IL1RN	6.64904	1.04547e-31	3.53942e-30
ENSG00000221852	KRTAP1-5	6.64294	2.09519e-06	9.99343e-06
ENSG00000256056	RP11-709A23.2	6.60696	1.20335e-08	7.64784e-08
ENSG00000065618	COL17A1	6.59956	2.99136e-47	1.82737e-45
ENSG00000160282	FTCD	6.44648	3.17839e-14	3.43468e-13
ENSG00000105501	SIGLEC5	6.42794	6.14333e-06	2.75001e-05
ENSG00000131738	KRT33B	6.35991	5.37795e-08	3.16836e-07
ENSG00000206073	SERPINB4	6.3576	4.44775e-10	3.27244e-09
ENSG00000105509	HAS1	6.34301	7.69059e-06	3.39786e-05
ENSG00000213417	KRTAP2-4	6.32978	7.96312e-06	3.51106e-05
ENSG00000113600	C9	6.31109	7.74553e-06	3.41979e-05
ENSG00000220583	RPL35P2	6.30472	7.8126e-06	3.44784e-05
ENSG00000254104	RP11-63E5.1	6.29183	8.89926e-06	3.88052e-05
ENSG00000204993	AC139712.2	6.25944	9.3006e-06	4.05188e-05
ENSG00000269118	FAM90A28P	6.24366	7.60014e-08	4.3881e-07
ENSG00000268964	ERVV-2	6.20316	6.12343e-47	3.69409e-45
ENSG00000105246	EBI3	6.19496	4.8338e-13	4.72284e-12
ENSG00000178934	LGALS7B	6.19399	1.18048e-05	5.06198e-05
ENSG00000166592	RRAD	6.17725	1.23217e-60	1.18124e-58
ENSG00000170091	HMP19	6.15475	1.67236e-09	1.15952e-08
ENSG00000133454	MYO18B	6.15023	1.33311e-05	5.67491e-05
ENSG00000142224	IL19	6.12172	9.54103e-20	1.56711e-18
ENSG00000105549	THEG	6.06647	1.88455e-07	1.03168e-06
ENSG00000131737	KRT34	6.05448	2.71895e-30	8.39752e-29
ENSG00000176769	TCERG1L	5.98894	3.16557e-07	1.68271e-06
ENSG00000198090	KRTAP4-6	5.97501	2.78208e-05	0.000112922
ENSG00000196358	NTNG2	5.96947	4.82839e-25	1.10522e-23
ENSG00000100427	MLC1	5.96568	5.68939e-09	3.73855e-08
ENSG00000232810	TNF	5.94577	2.21556e-15	2.63378e-14
ENSG00000213557	RP11-240E2.2	5.91815	2.91895e-05	0.000118106
ENSG00000203923	SPANXN1	5.89151	3.99015e-05	0.000158079
ENSG00000079393	DUSP13	5.85995	4.00536e-05	0.000158585
ENSG00000180043	FAM71E2	5.85253	5.43963e-05	0.000210424
ENSG00000125538	IL1B	5.84307	2.52304e-81	4.88586e-79
ENSG00000143217	NECTIN4	5.81965	4.46822e-223	5.76848e-220
ENSG00000164400	CSF2	5.79896	1.33651e-17	1.90585e-16
ENSG00000177243	DEFB103B	5.7526	5.37068e-05	0.000207965
ENSG00000255432	RP11-831H9.11	5.70298	5.99209e-05	0.000230232
ENSG00000115155	OTOF	5.69881	7.2301e-05	0.000273833
ENSG00000162891	IL20	5.68242	9.64046e-14	1.00262e-12
ENSG00000216588	IGSF23	5.67813	9.44481e-14	9.84385e-13
ENSG00000169429	CXCL8	5.65937	0	0
ENSG00000170827	CELP	5.63569	4.93522e-08	2.92175e-07
ENSG00000117069	ST6GALNAC5	5.63377	1.476e-06	7.18341e-06
ENSG00000185974	GRK1	5.63085	7.17746e-05	0.000272005
ENSG00000231924	PSG1	5.63066	6.75952e-54	5.15347e-52
ENSG00000226945	RP11-564A8.4	5.61913	1.53549e-06	7.44487e-06
ENSG00000179776	CDH5	5.61171	1.91066e-18	2.88837e-17
ENSG00000179913	B3GNT3	5.61116	4.57606e-08	2.72077e-07
ENSG00000176134	RP11-574E24.3	5.59449	0.000102573	0.000378204
ENSG00000104435	STMN2	5.56402	8.83279e-05	0.00032938
ENSG00000168081	PNOC	5.56219	2.00321e-06	9.5878e-06
ENSG00000186115	CYP4F2	5.55694	2.56643e-13	2.56312e-12
ENSG00000196734	LCE1B	5.544	8.66273e-08	4.96313e-07
ENSG00000223722	RP11-467L13.5	5.53404	2.49312e-06	1.17439e-05
ENSG00000057149	SERPINB3	5.4965	1.76937e-20	3.05109e-19
ENSG00000184697	CLDN6	5.49635	1.93437e-10	1.47477e-09
ENSG00000174358	SLC6A19	5.49056	2.83583e-06	1.32328e-05
ENSG00000180190	TDRP	5.48576	0.000114587	0.000418912
ENSG00000172554	SNTG2	5.45112	0.000149763	0.000536968
ENSG00000183668	PSG9	5.44638	7.92688e-09	5.14941e-08
ENSG00000102575	ACP5	5.4326	1.509e-12	1.40896e-11
ENSG00000167850	CD300C	5.41918	3.3966e-06	1.56869e-05
ENSG00000170848	PSG6	5.41637	2.43468e-27	6.50311e-26
ENSG00000131080	EDA2R	5.40989	2.10849e-24	4.67709e-23
ENSG00000010282	HHATL	5.39791	0.000143045	0.000514977
ENSG00000227568	SNX18P26	5.39479	0.000147608	0.000529831
ENSG00000042832	TG	5.36249	7.02736e-15	8.00499e-14
ENSG00000002079	MYH16	5.35934	1.9923e-19	3.20706e-18
ENSG00000227105	PARP1P1	5.35572	9.68671e-15	1.0887e-13
ENSG00000015413	DPEP1	5.35296	7.31076e-10	5.2806e-09
ENSG00000240244	GAPDHP33	5.35098	0.000165954	0.000591187
ENSG00000030304	MUSK	5.33411	5.36969e-06	2.42105e-05
ENSG00000169306	IL1RAPL1	5.31098	2.59427e-07	1.39318e-06
ENSG00000187026	KRTAP21-2	5.30258	0.00019654	0.000692253
ENSG00000187902	SHISA7	5.28727	0.000190252	0.000671692
ENSG00000120937	NPPB	5.28615	3.71583e-07	1.95695e-06
ENSG00000240764	PCDHGC5	5.28151	0.000233664	0.000811643
ENSG00000122733	PHF24	5.2255	5.9515e-14	6.31512e-13
ENSG00000183128	CALHM3	5.21163	3.12788e-16	4.00339e-15
ENSG00000169548	ZNF280A	5.20566	0.000245776	0.000850661
ENSG00000144158	RP11-395L14.17	5.19683	0.000319525	0.00108898
ENSG00000269964	MEI4	5.15696	0.000280806	0.00096415
ENSG00000248583	RP11-241F15.1	5.1362	1.62423e-15	1.94877e-14
ENSG00000181790	ADGRB1	5.13382	1.30074e-05	5.5482e-05
ENSG00000214249	CTAGE11P	5.1262	1.27562e-05	5.45067e-05
ENSG00000080031	PTPRH	5.11912	3.49266e-56	2.85381e-54
ENSG00000135744	AGT	5.10984	8.23234e-44	4.49068e-42
ENSG00000106631	MYL7	5.10388	8.92229e-07	4.46576e-06
ENSG00000178522	AMBN	5.10232	0.000303435	0.00103872
ENSG00000176136	MC5R	5.10029	9.90007e-07	4.9284e-06
ENSG00000163092	XIRP2	5.09738	1.32602e-05	5.64734e-05
ENSG00000211890	IGHA2	5.08646	5.79622e-23	1.16678e-21
ENSG00000271361	HTATSF1P2	5.08088	1.42182e-05	6.0407e-05
ENSG00000198857	HSD3BP5	5.07704	7.49139e-11	5.95529e-10
ENSG00000134339	SAA2	5.07388	7.09813e-27	1.84752e-25
ENSG00000128564	VGF	5.05776	4.77805e-19	7.52863e-18
ENSG00000221878	PSG7	5.03519	1.5619e-05	6.59523e-05
ENSG00000184163	FAM132A	5.0042	1.36469e-14	1.51359e-13
ENSG00000164744	SUN3	4.99887	1.44969e-06	7.06244e-06
ENSG00000179046	TRIML2	4.98977	5.12438e-147	2.68199e-144
ENSG00000189433	GJB4	4.98933	0.000389667	0.00130642
ENSG00000198021	SPANXA1	4.98153	1.51869e-06	7.3671e-06
ENSG00000203926	SPANXA2	4.98153	1.51869e-06	7.3671e-06
ENSG00000164256	PRDM9	4.97619	2.33632e-05	9.55698e-05
ENSG00000169067	ACTBL2	4.97321	5.6604e-22	1.08528e-20
ENSG00000234982	RP11-280O24.3	4.96785	2.79631e-05	0.000113476
ENSG00000182950	ODF3L1	4.93962	2.05807e-08	1.27371e-07
ENSG00000125510	OPRL1	4.92494	2.92408e-12	2.66846e-11
ENSG00000237090	RP11-342M1.6	4.91121	0.000506919	0.00166409
ENSG00000015592	STMN4	4.86919	0.000568495	0.00184992
ENSG00000182759	MAFA	4.86541	3.05221e-05	0.000123086
ENSG00000184811	TUSC5	4.8204	0.000566375	0.00184334
ENSG00000162267	ITIH3	4.80791	0.000691379	0.00221445
ENSG00000158258	CLSTN2	4.80259	5.69677e-17	7.70915e-16
ENSG00000273777	CEACAM20	4.7939	4.0567e-05	0.000160421
ENSG00000129244	ATP1B2	4.7826	1.87349e-61	1.86052e-59
ENSG00000262748	AC004231.7	4.76998	1.15131e-31	3.89096e-30
ENSG00000129946	SHC2	4.76678	5.09902e-06	2.3033e-05
ENSG00000120279	MYCT1	4.74163	3.39583e-16	4.32918e-15
ENSG00000104804	TULP2	4.7331	9.07427e-08	5.18817e-07
ENSG00000188488	SERPINA5	4.6957	0.000845623	0.00265966
ENSG00000100628	ASB2	4.68977	1.38159e-28	3.87746e-27
ENSG00000163739	CXCL1	4.66788	3.63064e-198	3.05684e-195
ENSG00000204882	GPR20	4.65867	7.30763e-06	3.23753e-05
ENSG00000167723	TRPV3	4.6356	2.38712e-91	5.37518e-89
ENSG00000204577	LILRB3	4.63073	8.48673e-25	1.91768e-23
ENSG00000173432	SAA1	4.62953	4.46836e-38	1.95327e-36
ENSG00000277494	GPIHBP1	4.62547	0.000883635	0.00276573
ENSG00000176222	ZNF404	4.62457	1.75497e-07	9.64114e-07
ENSG00000167851	CD300A	4.6206	7.99906e-05	0.000301014
ENSG00000156920	ADGRG4	4.60806	0.000934663	0.0029104
ENSG00000198092	TMPRSS11F	4.59007	0.000890076	0.00278365
ENSG00000234422	UBE2WP1	4.5858	0.000887297	0.00277585
ENSG00000205755	CRLF2	4.54688	3.75375e-07	1.97424e-06
ENSG00000110876	SELPLG	4.52317	7.63878e-44	4.17867e-42
ENSG00000206072	SERPINB11	4.51679	0.00113886	0.00348583
ENSG00000110203	FOLR3	4.49787	8.78771e-10	6.27717e-09
ENSG00000267706	CTD-2105E13.6	4.47339	2.91331e-08	1.77298e-07
ENSG00000177363	LRRN4CL	4.46452	1.12551e-45	6.48676e-44
ENSG00000155265	GOLGA7B	4.46098	5.86591e-13	5.6882e-12
ENSG00000140519	RHCG	4.44655	8.42755e-13	8.07518e-12
ENSG00000012223	LTF	4.44039	1.13871e-53	8.514e-52
ENSG00000178947	SMIM10L2A	4.43274	0.000143393	0.000515751
ENSG00000244694	PTCHD4	4.42581	1.63648e-62	1.713e-60
ENSG00000212722	KRTAP4-9	4.41395	0.00127797	0.00387231
ENSG00000012124	CD22	4.41223	1.13339e-17	1.62458e-16
ENSG00000080573	COL5A3	4.41067	8.53367e-94	1.96732e-91
ENSG00000130513	GDF15	4.40975	0	0
ENSG00000007312	CD79B	4.40975	8.24303e-07	4.14721e-06
ENSG00000204880	KRTAP4-8	4.40196	0.00123708	0.00375899
ENSG00000231672	DIRC3	4.4001	7.22306e-33	2.55246e-31
ENSG00000170835	CEL	4.39716	7.74953e-34	2.84762e-32
ENSG00000268500	AC018755.18	4.39105	0.000177761	0.000629888
ENSG00000189045	ANKDD1B	4.37631	0.000170592	0.000606262
ENSG00000214544	GTF2IRD2P1	4.37328	3.10397e-05	0.000125095
ENSG00000198573	SPANXC	4.3675	0.00016599	0.000591209
ENSG00000136114	THSD1	4.34121	1.97898e-21	3.62906e-20
ENSG00000188263	IL17REL	4.33543	0.00142944	0.00429696
ENSG00000197748	CFAP43	4.32926	4.22791e-10	3.11306e-09
ENSG00000168918	INPP5D	4.32327	1.84783e-11	1.56585e-10
ENSG00000261949	GFY	4.3186	3.31013e-13	3.26545e-12
ENSG00000136167	LCP1	4.30311	2.36349e-47	1.45298e-45
ENSG00000182901	RGS7	4.29381	4.83619e-09	3.20181e-08
ENSG00000236252	RP11-15J10.8	4.29138	7.85995e-08	4.53134e-07
ENSG00000179292	TMEM151A	4.29076	1.09986e-11	9.55957e-11
ENSG00000189320	FAM180A	4.26608	5.11448e-13	4.987e-12
ENSG00000274274	GAGE13	4.26587	0.00168537	0.00498125
ENSG00000227234	SPANXB1	4.26119	2.45759e-33	8.7969e-32
ENSG00000283528	RP11-298A10.1	4.2484	0.00164638	0.00487794
ENSG00000227742	CALR4P	4.24752	0.00158736	0.00472257
ENSG00000204941	PSG5	4.23896	1.05253e-38	4.74006e-37
ENSG00000166961	MS4A15	4.22185	0.0016571	0.00490444
ENSG00000128298	BAIAP2L2	4.21689	1.27197e-07	7.1087e-07
ENSG00000153902	LGI4	4.21381	0.00178345	0.00523915
ENSG00000092051	JPH4	4.19493	0.001764	0.00518753
ENSG00000145113	MUC4	4.19115	4.30012e-40	2.00173e-38
ENSG00000159871	LYPD5	4.1884	6.89075e-58	6.12107e-56
ENSG00000105219	CNTD2	4.18551	1.61927e-20	2.80224e-19
ENSG00000237575	PYY2	4.17684	3.65767e-06	1.68364e-05
ENSG00000161896	IP6K3	4.16591	2.26838e-07	1.22878e-06
ENSG00000124467	PSG8	4.15639	6.9263e-05	0.000263202
ENSG00000155511	GRIA1	4.15067	4.23622e-06	1.93291e-05
ENSG00000221986	MYBPHL	4.12601	6.36637e-06	2.84132e-05
ENSG00000026751	SLAMF7	4.11902	4.80169e-23	9.70613e-22
ENSG00000197641	SERPINB13	4.11407	0.000344142	0.00116509
ENSG00000101188	NTSR1	4.10352	0.000358381	0.00121012
ENSG00000077009	NMRK2	4.09426	0.000364478	0.00122985
ENSG00000111181	SLC6A12	4.08962	5.02153e-06	2.27095e-05
ENSG00000277639	RP11-467J12.4	4.08944	5.28643e-17	7.17391e-16
ENSG00000104415	WISP1	4.07388	4.90093e-07	2.54032e-06
ENSG00000130477	UNC13A	4.07216	2.08105e-73	3.0763e-71
ENSG00000188523	CFAP77	4.04612	0.000415763	0.001386
ENSG00000179869	ABCA13	4.03675	2.93341e-21	5.30893e-20
ENSG00000126860	EVI2A	4.03521	6.05729e-07	3.1018e-06
ENSG00000121797	CCRL2	4.02862	0.000125238	0.000454332
ENSG00000142319	SLC6A3	4.02789	1.77688e-13	1.79871e-12
ENSG00000188293	IGFL1	4.01462	4.34253e-80	8.08587e-78
ENSG00000228286	AP000593.5	4.01292	0.002228	0.0064185
ENSG00000147174	ACRC	4.0063	4.16254e-179	2.98546e-176
ENSG00000214485	RPL7P1	4.00309	0.00229342	0.00659128
ENSG00000198133	TMEM229B	4.00086	2.61382e-17	3.63365e-16
ENSG00000101203	COL20A1	4.00029	6.48367e-07	3.30934e-06
ENSG00000149972	CNTN5	3.99008	1.2002e-18	1.84605e-17
ENSG00000189056	RELN	3.98626	7.8343e-09	5.09611e-08
ENSG00000160808	MYL3	3.98006	0.000463079	0.00153056
ENSG00000239474	KLHL41	3.94549	1.04552e-12	9.90053e-12
ENSG00000163207	IVL	3.92494	0.000565361	0.00184065
ENSG00000095932	SMIM24	3.9225	5.78623e-22	1.10831e-20
ENSG00000162771	FAM71A	3.91661	0.000621717	0.00200961
ENSG00000108405	P2RX1	3.90983	1.1979e-79	2.18461e-77
ENSG00000166396	SERPINB7	3.90581	2.24127e-39	1.02849e-37
ENSG00000130294	KIF1A	3.89969	1.67748e-05	7.04193e-05
ENSG00000128482	RNF112	3.85411	0.000688978	0.00220749
ENSG00000237961	RP11-1281K21.1	3.84604	0.000730077	0.00232532
ENSG00000162426	SLC45A1	3.84416	3.37752e-07	1.78949e-06
ENSG00000108309	RUNDC3A	3.8306	2.55271e-27	6.79963e-26
ENSG00000242221	PSG2	3.8201	6.30202e-17	8.49259e-16
ENSG00000179520	SLC17A8	3.81244	0.000787082	0.00248942
ENSG00000168309	FAM107A	3.79962	2.55225e-05	0.000104051
ENSG00000100385	IL2RB	3.79062	2.30312e-24	5.08551e-23
ENSG00000114771	AADAC	3.79019	0.000791463	0.00250272
ENSG00000162723	SLAMF9	3.78493	0.000826293	0.00260478
ENSG00000010379	SLC6A13	3.78443	1.55625e-10	1.19781e-09
ENSG00000122641	INHBA	3.77533	9.26832e-61	8.97405e-59
ENSG00000125910	S1PR4	3.76497	0.000267759	0.000922134
ENSG00000162992	NEUROD1	3.75579	8.05626e-09	5.22645e-08
ENSG00000164283	ESM1	3.75386	4.62733e-06	2.10249e-05
ENSG00000186973	FAM183A	3.73846	0.0010155	0.0031374
ENSG00000184497	TMEM255B	3.73291	1.14123e-30	3.58765e-29
ENSG00000166736	HTR3A	3.73034	3.65521e-05	0.000145554
ENSG00000236238	AC093106.4	3.72861	0.000968736	0.00300972
ENSG00000214553	LRRC37A11P	3.72129	2.27074e-09	1.55271e-08
ENSG00000260220	CCDC187	3.72123	0.000387877	0.00130132
ENSG00000183160	TMEM119	3.71675	4.13803e-21	7.41285e-20
ENSG00000160963	COL26A1	3.71388	0.000371808	0.00125184
ENSG00000157087	ATP2B2	3.70201	0.000974308	0.00302509
ENSG00000224389	C4B	3.69489	1.25469e-24	2.8089e-23
ENSG00000164825	DEFB1	3.66954	0.00111914	0.00343022
ENSG00000249884	RNF103-CHMP3	3.66597	1.20535e-10	9.38168e-10
ENSG00000197540	GZMM	3.64383	4.57493e-10	3.35964e-09
ENSG00000161082	CELF5	3.63947	8.14705e-09	5.27828e-08
ENSG00000019169	MARCO	3.63829	5.52668e-17	7.48944e-16
ENSG00000100298	APOBEC3H	3.63167	0.00109116	0.0033519
ENSG00000170298	LGALS9B	3.62689	1.79946e-06	8.65969e-06
ENSG00000173535	TNFRSF10C	3.62624	9.39987e-44	5.09884e-42
ENSG00000007516	BAIAP3	3.62041	7.25657e-18	1.05657e-16
ENSG00000105650	PDE4C	3.61666	4.48237e-41	2.12748e-39
ENSG00000225760	LINC00431	3.61359	1.00051e-17	1.44265e-16
ENSG00000268223	ARL14EPL	3.60107	1.46783e-05	6.21846e-05
ENSG00000160471	COX6B2	3.59431	2.09279e-65	2.36999e-63
ENSG00000233974	RP11-823P9.3	3.59027	9.85544e-15	1.10638e-13
ENSG00000116183	PAPPA2	3.58831	9.44636e-23	1.89171e-21
ENSG00000173947	PIFO	3.58728	0.00117929	0.00359524
ENSG00000186517	ARHGAP30	3.57833	1.11158e-26	2.84355e-25
ENSG00000237330	RNF223	3.57713	1.0099e-18	1.56454e-17
ENSG00000243137	PSG4	3.57504	1.40149e-56	1.15982e-54
ENSG00000060558	GNA15	3.57109	3.87188e-13	3.80603e-12
ENSG00000234537	RP11-100G15.7	3.56244	2.09795e-05	8.65319e-05
ENSG00000171812	COL8A2	3.55751	6.32444e-17	8.51689e-16
ENSG00000131126	TEX101	3.5569	0.000659675	0.00211992
ENSG00000171236	LRG1	3.55039	1.69677e-23	3.57151e-22
ENSG00000142619	PADI3	3.54508	1.1053e-16	1.46302e-15
ENSG00000164463	CREBRF	3.53802	1.00664e-282	2.43669e-279
ENSG00000100867	DHRS2	3.5275	7.08026e-56	5.71288e-54
ENSG00000215182	MUC5AC	3.52628	6.56241e-27	1.71499e-25
ENSG00000157368	IL34	3.52187	0.000638717	0.00205872
ENSG00000175600	SUGCT	3.52097	2.6454e-27	7.03684e-26
ENSG00000258590	NBEAP1	3.51946	1.55292e-05	6.56029e-05
ENSG00000263264	CTB-133G6.1	3.51528	0.00148164	0.00443805
ENSG00000181634	TNFSF15	3.51289	4.06749e-74	6.20212e-72
ENSG00000113578	FGF1	3.49423	2.93706e-32	1.01746e-30
ENSG00000167676	PLIN4	3.48051	1.09046e-19	1.78351e-18
ENSG00000163810	TGM4	3.46966	1.73906e-11	1.479e-10
ENSG00000105963	ADAP1	3.46894	2.61082e-55	2.09787e-53
ENSG00000196189	SEMA4A	3.4597	1.92699e-13	1.94456e-12
ENSG00000205177	C11orf91	3.45529	2.52196e-05	0.000102881
ENSG00000105967	TFEC	3.45177	0.00164133	0.0048637
ENSG00000087076	HSD17B14	3.45108	3.84793e-09	2.57392e-08
ENSG00000095752	IL11	3.4423	4.67314e-207	4.76291e-204
ENSG00000157680	DGKI	3.44132	5.32857e-54	4.09476e-52
ENSG00000144583	MARCH4	3.43983	3.01919e-71	4.08857e-69
ENSG00000136695	IL36RN	3.4317	0.00180455	0.00529713
ENSG00000141255	SPATA22	3.42546	0.00162374	0.00481748
ENSG00000250292	RP11-451F20.1	3.41506	0.00181019	0.00530725
ENSG00000171951	SCG2	3.41408	2.74682e-121	1.02293e-118
ENSG00000198576	ARC	3.39684	1.80191e-17	2.53775e-16
ENSG00000259982	CDC37P1	3.39178	0.00119327	0.00363556
ENSG00000279208	bP-21264C1.1	3.38073	2.69159e-67	3.27815e-65
ENSG00000136859	ANGPTL2	3.3393	2.20445e-15	2.6238e-14
ENSG00000166816	LDHD	3.33517	1.44203e-15	1.73987e-14
ENSG00000107165	TYRP1	3.32121	1.31337e-10	1.02019e-09
ENSG00000181652	ATG9B	3.31969	2.17012e-10	1.64479e-09
ENSG00000169059	VCX3A	3.30826	0.00116824	0.00356491
ENSG00000240602	AADACP1	3.2969	2.3292e-05	9.53391e-05
ENSG00000197093	GAL3ST4	3.26627	4.73628e-27	1.24617e-25
ENSG00000143631	FLG	3.25904	1.00935e-26	2.59922e-25
ENSG00000173762	CD7	3.24614	1.36791e-10	1.06e-09
ENSG00000101850	GPR143	3.246	1.56327e-12	1.45752e-11
ENSG00000215262	KCNU1	3.23358	0.000345177	0.00116839
ENSG00000089163	SIRT4	3.23229	5.91898e-10	4.30098e-09
ENSG00000169064	ZBBX	3.23177	0.00255533	0.00727277
ENSG00000249026	CTNNAP1	3.22526	0.000338631	0.0011478
ENSG00000187094	CCK	3.22364	0.00250927	0.00715326
ENSG00000169783	LINGO1	3.20897	7.99258e-05	0.000300829
ENSG00000269891	ARHGAP19-SLIT1	3.20408	0.00323002	0.00898697
ENSG00000169085	C8orf46	3.19894	5.95791e-08	3.49092e-07
ENSG00000172738	TMEM217	3.19094	2.62163e-46	1.5431e-44
ENSG00000123342	MMP19	3.18064	4.38032e-20	7.3378e-19
ENSG00000144229	THSD7B	3.17633	0.000113524	0.000415498
ENSG00000108342	CSF3	3.17004	0.000429544	0.00142948
ENSG00000138271	GPR87	3.16613	3.31898e-17	4.57778e-16
ENSG00000255104	TBC1D26	3.16601	0.000519236	0.00170193
ENSG00000115008	IL1A	3.15745	1.77861e-112	5.83777e-110
ENSG00000104951	IL4I1	3.15742	1.31932e-05	5.62127e-05
ENSG00000159339	PADI4	3.1528	6.60518e-05	0.000251988
ENSG00000124466	LYPD3	3.14032	6.3277e-67	7.61093e-65
ENSG00000116748	AMPD1	3.13972	0.00276414	0.0078074
ENSG00000273802	HIST1H2BG	3.1359	2.32064e-29	6.79867e-28
ENSG00000056291	NPFFR2	3.12372	0.00300167	0.00841083
ENSG00000161381	PLXDC1	3.11259	3.1518e-31	1.02579e-29
ENSG00000170965	PLAC1	3.10999	1.25474e-22	2.48956e-21
ENSG00000170044	ZPLD1	3.10951	4.4149e-05	0.000173558
ENSG00000177599	ZNF491	3.10798	0.000217551	0.000759899
ENSG00000185955	C7orf61	3.10518	6.10782e-12	5.43307e-11
ENSG00000204099	NEU4	3.10145	2.27743e-14	2.48604e-13
ENSG00000100060	MFNG	3.10055	4.35004e-06	1.98022e-05
ENSG00000158296	SLC13A3	3.09978	2.31659e-07	1.25344e-06
ENSG00000127831	VIL1	3.09961	1.09935e-05	4.73717e-05
ENSG00000104760	FGL1	3.0837	0.000608128	0.0019693
ENSG00000136531	SCN2A	3.07689	8.48427e-22	1.60134e-20
ENSG00000125735	TNFSF14	3.07375	1.73242e-22	3.40937e-21
ENSG00000125531	FNDC11	3.06452	1.57899e-05	6.65879e-05
ENSG00000006047	YBX2	3.06422	8.52132e-10	6.09813e-09
ENSG00000153404	PLEKHG4B	3.06152	1.21571e-13	1.25425e-12
ENSG00000073737	DHRS9	3.03744	2.47383e-17	3.44893e-16
ENSG00000188897	CTD-3088G3.8	3.03651	2.57032e-15	3.02764e-14
ENSG00000121104	FAM117A	3.02144	1.66405e-11	1.4202e-10
ENSG00000198788	MUC2	3.01644	5.728e-06	2.57123e-05
ENSG00000102003	SYP	3.01272	8.14202e-28	2.21758e-26
ENSG00000171916	LGALS9C	3.01171	0.00068783	0.00220454
ENSG00000167207	NOD2	3.01111	0.000207952	0.000730056
ENSG00000204540	PSORS1C1	3.00667	9.48898e-44	5.13279e-42
ENSG00000239617	RP11-302B13.1	3.00033	0.000217155	0.000758844
ENSG00000215325	ASS1P10	2.99999	1.48576e-06	7.2263e-06
ENSG00000131096	PYY	2.9893	0.00238299	0.00683045
ENSG00000180155	LYNX1	2.9857	7.14411e-08	4.14208e-07
ENSG00000124116	WFDC3	2.98312	3.64195e-06	1.6768e-05
ENSG00000189280	GJB5	2.97757	5.24251e-18	7.71438e-17
ENSG00000279968	GVQW2	2.97649	0.00379276	0.0104269
ENSG00000162366	PDZK1IP1	2.97401	1.5099e-13	1.54297e-12
ENSG00000108830	RND2	2.97289	6.51938e-13	6.29979e-12
ENSG00000225101	OR52K3P	2.97256	0.00115362	0.00352754
ENSG00000177679	SRRM3	2.97218	3.29253e-07	1.74589e-06
ENSG00000144045	DQX1	2.96754	2.70102e-08	1.65053e-07
ENSG00000159713	TPPP3	2.96533	1.52128e-20	2.63503e-19
ENSG00000198336	MYL4	2.96049	0.000445308	0.00147664
ENSG00000129910	CDH15	2.95768	3.16997e-05	0.000127569
ENSG00000214814	FER1L6	2.95326	0.000313968	0.00107141
ENSG00000130287	NCAN	2.95238	0.000822782	0.00259583
ENSG00000243649	CFB	2.9432	2.32362e-52	1.69162e-50
ENSG00000250492	INTS6P1	2.94282	0.00395328	0.0108282
ENSG00000048052	HDAC9	2.93956	1.53251e-59	1.43368e-57
ENSG00000100290	BIK	2.93504	9.93284e-08	5.6424e-07
ENSG00000170454	KRT75	2.9345	5.83299e-16	7.28277e-15
ENSG00000189068	VSTM1	2.93331	3.69799e-07	1.94861e-06
ENSG00000101197	BIRC7	2.93116	2.00602e-05	8.29877e-05
ENSG00000255408	PCDHA3	2.92936	0.00267156	0.0075713
ENSG00000182782	HCAR2	2.92794	0.000372382	0.00125325
ENSG00000183171	RP11-49C9.2	2.9264	0.000130864	0.000473679
ENSG00000168481	LGI3	2.92337	9.16655e-07	4.58239e-06
ENSG00000241104	CEACAMP10	2.91868	5.7399e-06	2.57597e-05
ENSG00000106366	SERPINE1	2.91557	0	0
ENSG00000131864	USP29	2.90863	3.73073e-05	0.00014847
ENSG00000177692	DNAJC28	2.90712	4.96457e-10	3.632e-09
ENSG00000175946	KLHL38	2.90511	4.49793e-07	2.34146e-06
ENSG00000176746	MAGEB6	2.90501	1.49104e-07	8.26152e-07
ENSG00000196557	CACNA1H	2.90466	5.74875e-05	0.000221542
ENSG00000159167	STC1	2.9029	0.000118898	0.000433365
ENSG00000157873	TNFRSF14	2.90247	4.13596e-80	7.776e-78
ENSG00000184524	CEND1	2.89163	2.48395e-06	1.17064e-05
ENSG00000167210	LOXHD1	2.88977	0.00283896	0.00800357
ENSG00000124762	CDKN1A	2.8847	0	0
ENSG00000078596	ITM2A	2.88001	0.00107138	0.0032971
ENSG00000131044	TTLL9	2.8793	1.13233e-06	5.58805e-06
ENSG00000101204	CHRNA4	2.87844	0.00157845	0.00469896
ENSG00000198768	APCDD1L	2.87346	2.20434e-10	1.66877e-09
ENSG00000274810	NPHP3-ACAD11	2.86416	0.000377812	0.00127042
ENSG00000067445	TRO	2.86346	1.65314e-07	9.11274e-07
ENSG00000230882	AC005077.14	2.85671	0.000529618	0.00173273
ENSG00000160472	TMEM190	2.84492	7.03619e-05	0.000266907
ENSG00000108688	CCL7	2.84247	0.00457385	0.0123377
ENSG00000185507	IRF7	2.83782	3.14754e-28	8.70743e-27
ENSG00000273259	SERPINA3	2.83249	9.26713e-05	0.000344581
ENSG00000213937	CLDN9	2.81976	7.27531e-05	0.000275276
ENSG00000145506	NKD2	2.81861	4.41501e-11	3.59683e-10
ENSG00000205420	KRT6A	2.81483	2.19525e-12	2.02241e-11
ENSG00000165606	DRGX	2.80675	6.74882e-06	3.00301e-05
ENSG00000122133	PAEP	2.8057	1.42384e-07	7.91862e-07
ENSG00000129991	TNNI3	2.79694	0.00451352	0.0121886
ENSG00000105048	TNNT1	2.79592	2.62045e-83	5.28593e-81
ENSG00000144452	ABCA12	2.78212	3.54951e-13	3.49625e-12
ENSG00000169962	TAS1R3	2.76026	6.20206e-14	6.57018e-13
ENSG00000234498	RPL13AP20	2.75875	1.61402e-25	3.81164e-24
ENSG00000089723	OTUB2	2.75831	5.19469e-54	4.00778e-52
ENSG00000136928	GABBR2	2.75659	4.51503e-09	2.99635e-08
ENSG00000132932	ATP8A2	2.75461	0.0053159	0.0141094
ENSG00000172478	C2orf54	2.75371	3.49222e-05	0.000139754
ENSG00000188833	ENTPD8	2.74873	0.00144453	0.00433896
ENSG00000101049	SGK2	2.74562	0.00145273	0.0043591
ENSG00000101222	SPEF1	2.74275	4.90283e-05	0.000191264
ENSG00000177675	CD163L1	2.74123	3.75907e-26	9.30876e-25
ENSG00000149527	PLCH2	2.73902	0.000151813	0.000543512
ENSG00000132965	ALOX5AP	2.73858	7.564e-08	4.36853e-07
ENSG00000162148	PPP1R32	2.73697	3.65031e-07	1.92506e-06
ENSG00000137868	STRA6	2.72974	1.76039e-131	7.41086e-129
ENSG00000182021	RP11-381O7.3	2.7235	1.91553e-07	1.04697e-06
ENSG00000167680	SEMA6B	2.72147	9.51617e-11	7.47285e-10
ENSG00000116661	FBXO2	2.72136	2.28976e-06	1.08493e-05
ENSG00000179178	TMEM125	2.71726	1.00094e-07	5.67924e-07
ENSG00000169896	ITGAM	2.71545	9.27485e-07	4.63145e-06
ENSG00000146216	TTBK1	2.71327	0.000343475	0.00116344
ENSG00000165949	IFI27	2.70277	3.01265e-27	7.95906e-26
ENSG00000120659	TNFSF11	2.69939	0.00423619	0.0115216
ENSG00000243742	RPLP0P2	2.69778	1.02195e-23	2.17235e-22
ENSG00000119630	PGF	2.6956	2.78276e-21	5.05044e-20
ENSG00000176490	DIRAS1	2.68901	6.6301e-19	1.03625e-17
ENSG00000152926	ZNF117	2.6849	3.43406e-28	9.45954e-27
ENSG00000186897	C1QL4	2.68034	4.64608e-07	2.41728e-06
ENSG00000111335	OAS2	2.67682	4.32875e-28	1.18734e-26
ENSG00000179148	ALOXE3	2.67229	6.74056e-08	3.91985e-07
ENSG00000185304	RGPD2	2.66612	0.00129837	0.00392982
ENSG00000279487	AC234582.1	2.66494	0.000123945	0.000450149
ENSG00000138109	CYP2C9	2.66195	0.00480416	0.012905
ENSG00000058335	RASGRF1	2.65632	3.78726e-09	2.53422e-08
ENSG00000160161	CILP2	2.65506	1.5587e-06	7.54982e-06
ENSG00000169245	CXCL10	2.64564	0.00576808	0.0151847
ENSG00000163803	PLB1	2.64166	5.55009e-23	1.11839e-21
ENSG00000183287	CCBE1	2.64139	3.20917e-25	7.44257e-24
ENSG00000268879	IGFL1P1	2.63116	1.44871e-43	7.68608e-42
ENSG00000125998	FAM83C	2.62742	0.00525188	0.0139606
ENSG00000213462	ERV3-1	2.62631	4.50091e-42	2.24062e-40
ENSG00000243710	CFAP57	2.62443	1.65505e-11	1.41361e-10
ENSG00000126016	AMOT	2.62178	4.12507e-10	3.0408e-09
ENSG00000144596	GRIP2	2.62067	7.86638e-05	0.000296309
ENSG00000162572	SCNN1D	2.62022	5.54549e-20	9.24168e-19
ENSG00000214212	C19orf38	2.61988	0.00101971	0.00314941
ENSG00000180720	CHRM4	2.61867	0.000122978	0.000446805
ENSG00000178602	OTOS	2.61671	0.000738565	0.00235003
ENSG00000130203	APOE	2.61411	4.40835e-10	3.24468e-09
ENSG00000163017	ACTG2	2.6112	3.96248e-127	1.59861e-124
ENSG00000172748	ZNF596	2.60565	6.02971e-42	2.97113e-40
ENSG00000197249	SERPINA1	2.60555	8.03383e-06	3.53779e-05
ENSG00000167711	SERPINF2	2.588	2.34408e-16	3.01816e-15
ENSG00000221866	PLXNA4	2.58479	1.11871e-06	5.5251e-06
ENSG00000136155	SCEL	2.5818	1.08952e-14	1.21887e-13
ENSG00000197915	HRNR	2.57513	5.57322e-06	2.50581e-05
ENSG00000205426	KRT81	2.57441	9.23548e-36	3.64247e-34
ENSG00000215156	RP11-1023L17.2	2.57238	2.20342e-05	9.04966e-05
ENSG00000181333	HEPHL1	2.56697	0.00281978	0.00795298
ENSG00000254415	SIGLEC14	2.56293	8.52261e-06	3.72972e-05
ENSG00000108691	CCL2	2.55469	1.11891e-155	7.22256e-153
ENSG00000171368	TPPP	2.55277	1.52671e-60	1.44925e-58
ENSG00000136383	ALPK3	2.55187	2.6065e-24	5.73578e-23
ENSG00000172361	CFAP53	2.55049	5.16248e-05	0.000200625
ENSG00000216331	HIST1H1PS1	2.54809	4.41932e-05	0.000173696
ENSG00000104888	SLC17A7	2.54364	2.59859e-13	2.5939e-12
ENSG00000142156	COL6A1	2.54107	5.89803e-63	6.31024e-61
ENSG00000126460	PRRG2	2.5401	1.10347e-08	7.04075e-08
ENSG00000089558	KCNH4	2.53916	3.79112e-06	1.74258e-05
ENSG00000164746	C7orf57	2.5373	2.11787e-09	1.45486e-08
ENSG00000169994	MYO7B	2.53446	3.91198e-09	2.61316e-08
ENSG00000155530	LRGUK	2.53337	3.3913e-05	0.00013594
ENSG00000132274	TRIM22	2.53126	1.20849e-65	1.37661e-63
ENSG00000168427	KLHL30	2.51991	1.10163e-21	2.06071e-20
ENSG00000165887	ANKRD2	2.51952	2.69874e-05	0.000109792
ENSG00000163071	SPATA18	2.51852	0.00606944	0.0159304
ENSG00000170075	GPR37L1	2.51369	1.49454e-07	8.27851e-07
ENSG00000136274	NACAD	2.51315	9.56547e-39	4.31784e-37
ENSG00000213144	RP11-64B16.2	2.51243	1.39605e-28	3.91237e-27
ENSG00000213654	GPSM3	2.4977	1.53317e-11	1.31488e-10
ENSG00000134668	SPOCD1	2.49232	1.77335e-258	2.86174e-255
ENSG00000183729	NPBWR1	2.49232	0.000154653	0.00055327
ENSG00000105499	PLA2G4C	2.49001	1.17912e-18	1.81797e-17
ENSG00000160460	SPTBN4	2.48896	0.00019944	0.000701828
ENSG00000166924	NYAP1	2.47986	2.6815e-06	1.2555e-05
ENSG00000231274	SBK3	2.47573	0.000865355	0.00271378
ENSG00000179603	GRM8	2.47064	0.000447154	0.00148172
ENSG00000007314	SCN4A	2.47002	0.000265667	0.000915417
ENSG00000166866	MYO1A	2.46749	5.61347e-05	0.000216846
ENSG00000184574	LPAR5	2.4658	1.48763e-18	2.26834e-17
ENSG00000176428	VPS37D	2.4492	0.00693701	0.0179544
ENSG00000153233	PTPRR	2.44766	9.58612e-19	1.48746e-17
ENSG00000197635	DPP4	2.4319	0.000194716	0.000686203
ENSG00000249834	PGBD4P3	2.42531	0.00709373	0.0182989
ENSG00000283234	RP11-26H16.4	2.42068	0.00693656	0.0179544
ENSG00000164850	GPER1	2.4204	1.37291e-08	8.68271e-08
ENSG00000204866	IGFL2	2.4202	4.10404e-29	1.18974e-27
ENSG00000099399	MAGEB2	2.41979	0.00720598	0.0185564
ENSG00000041515	MYO16	2.41783	3.71256e-36	1.49779e-34
ENSG00000023445	BIRC3	2.41776	6.47536e-153	4.04501e-150
ENSG00000138622	HCN4	2.41772	0.00698541	0.0180564
ENSG00000163734	CXCL3	2.41695	9.77844e-34	3.57282e-32
ENSG00000125740	FOSB	2.41677	2.51556e-125	9.94159e-123
ENSG00000282988	RP1-34B20.21	2.41161	1.17615e-15	1.42797e-14
ENSG00000183508	FAM46C	2.41161	2.42534e-09	1.65259e-08
ENSG00000204613	TRIM10	2.40673	7.26708e-07	3.68202e-06
ENSG00000090339	ICAM1	2.40512	9.33525e-145	4.63531e-142
ENSG00000182798	MAGEB17	2.40464	0.000330431	0.00112319
ENSG00000118160	SLC8A2	2.39888	0.00115955	0.00354231
ENSG00000104870	FCGRT	2.39295	5.7174e-25	1.30256e-23
ENSG00000144671	SLC22A14	2.38252	9.61373e-05	0.000356238
ENSG00000145879	SPINK7	2.37706	0.000227716	0.000792831
ENSG00000203812	HIST2H2AA3	2.3768	4.58058e-05	0.000179488
ENSG00000123612	ACVR1C	2.37544	0.00407276	0.0111255
ENSG00000248400	ST13P12	2.36954	0.00703975	0.0181815
ENSG00000113140	SPARC	2.36942	2.71057e-32	9.40685e-31
ENSG00000197769	MAP1LC3C	2.36612	0.00208609	0.00604386
ENSG00000108018	SORCS1	2.36528	0.000340118	0.00115227
ENSG00000141524	TMC6	2.36264	2.25649e-36	9.21878e-35
ENSG00000137033	IL33	2.36219	2.66536e-07	1.42938e-06
ENSG00000136542	GALNT5	2.36145	2.83447e-07	1.51545e-06
ENSG00000103546	SLC6A2	2.35372	0.000542265	0.00177112
ENSG00000081041	CXCL2	2.34917	3.48634e-106	1.00765e-103
ENSG00000099840	IZUMO4	2.34836	2.77127e-09	1.87773e-08
ENSG00000240280	TCAM1P	2.3443	0.000130997	0.000474069
ENSG00000104892	KLC3	2.34259	1.23544e-23	2.61753e-22
ENSG00000052344	PRSS8	2.33986	9.55133e-08	5.44324e-07
ENSG00000197191	CYSRT1	2.33714	2.90525e-139	1.33953e-136
ENSG00000163751	CPA3	2.3358	0.00318343	0.00887009
ENSG00000282815	TEX13C	2.33453	0.00427716	0.0116167
ENSG00000135373	EHF	2.33218	1.6574e-09	1.15038e-08
ENSG00000058085	LAMC2	2.33112	2.926e-38	1.29365e-36
ENSG00000175084	DES	2.32114	4.17775e-19	6.60965e-18
ENSG00000164796	CSMD3	2.31827	7.41344e-12	6.5374e-11
ENSG00000126583	PRKCG	2.31492	2.22811e-05	9.14721e-05
ENSG00000110427	KIAA1549L	2.31135	2.78673e-09	1.88755e-08
ENSG00000204248	COL11A2	2.30934	1.99366e-14	2.1849e-13
ENSG00000117407	ARTN	2.30642	5.01415e-26	1.23066e-24
ENSG00000136425	CIB2	2.30239	2.20382e-13	2.2101e-12
ENSG00000062038	CDH3	2.30212	5.55117e-19	8.71671e-18
ENSG00000250770	RP5-1063M23.3	2.30138	2.95562e-19	4.71463e-18
ENSG00000128510	CPA4	2.30126	3.28688e-263	7.07228e-260
ENSG00000197380	DACT3	2.29776	1.58837e-16	2.0783e-15
ENSG00000137877	SPTBN5	2.29551	6.35503e-36	2.52183e-34
ENSG00000115705	TPO	2.29545	8.08778e-05	0.000304057
ENSG00000205777	GAGE1	2.29395	0.00823528	0.0208852
ENSG00000174600	CMKLR1	2.28574	0.00289618	0.00815183
ENSG00000139973	SYT16	2.28367	3.54125e-07	1.87009e-06
ENSG00000166046	TCP11L2	2.28142	4.03364e-28	1.10954e-26
ENSG00000073756	PTGS2	2.27924	3.08196e-115	1.06575e-112
ENSG00000169894	MUC3A	2.27697	8.2555e-06	3.62265e-05
ENSG00000140465	CYP1A1	2.27593	1.00333e-75	1.59258e-73
ENSG00000047648	ARHGAP6	2.27085	9.43994e-07	4.71267e-06
ENSG00000132718	SYT11	2.26983	1.51389e-61	1.51898e-59
ENSG00000271647	KRT8P47	2.26907	3.55038e-05	0.000141817
ENSG00000188389	PDCD1	2.26513	0.00826891	0.0209591
ENSG00000166793	YPEL4	2.26092	0.000274024	0.00094237
ENSG00000114841	DNAH1	2.25969	4.3817e-21	7.83486e-20
ENSG00000136244	IL6	2.25843	9.01747e-199	8.3154e-196
ENSG00000183580	FBXL7	2.25462	0.00813614	0.0206686
ENSG00000129009	ISLR	2.24865	2.31719e-12	2.1307e-11
ENSG00000160255	ITGB2	2.24826	5.17439e-07	2.66921e-06
ENSG00000186510	CLCNKA	2.24285	0.000464621	0.00153513
ENSG00000162444	RBP7	2.23722	1.93201e-06	9.26056e-06
ENSG00000172794	RAB37	2.23273	6.50148e-06	2.89835e-05
ENSG00000159753	CARMIL2	2.23194	5.83892e-17	7.89049e-16
ENSG00000149489	ROM1	2.22465	8.82822e-62	8.9507e-60
ENSG00000137745	MMP13	2.22351	1.75643e-05	7.35423e-05
ENSG00000204610	TRIM15	2.22253	1.79038e-09	1.23824e-08
ENSG00000167103	PIP5KL1	2.22242	1.49549e-18	2.27854e-17
ENSG00000010310	GIPR	2.21729	2.47205e-10	1.86633e-09
ENSG00000140488	CELF6	2.21526	0.000272908	0.000938865
ENSG00000149256	TENM4	2.21399	8.76017e-05	0.000327113
ENSG00000159784	FAM131B	2.21023	4.88896e-05	0.000190838
ENSG00000176092	AIM1L	2.20496	4.12533e-20	6.92262e-19
ENSG00000243566	UPK3B	2.20238	9.78605e-25	2.20357e-23
ENSG00000112077	RHAG	2.20161	0.000510158	0.00167416
ENSG00000257150	PGAM1P5	2.20134	0.000137082	0.000494521
ENSG00000146469	VIP	2.19823	0.00357968	0.0098747
ENSG00000184489	PTP4A3	2.19198	3.56591e-05	0.000142409
ENSG00000185758	CLDN24	2.18826	0.00946572	0.0237071
ENSG00000163825	RTP3	2.18019	0.00858688	0.0217025
ENSG00000100311	PDGFB	2.17851	1.64753e-63	1.78237e-61
ENSG00000171798	KNDC1	2.17771	0.00575014	0.0151396
ENSG00000124839	RAB17	2.17399	2.17929e-10	1.65044e-09
ENSG00000242550	SERPINB10	2.17368	0.000314268	0.00107201
ENSG00000069812	HES2	2.1675	4.86235e-14	5.19071e-13
ENSG00000162946	DISC1	2.16722	6.29359e-34	2.33478e-32
ENSG00000163286	ALPPL2	2.16696	7.03637e-06	3.1245e-05
ENSG00000102886	GDPD3	2.15814	6.20376e-16	7.73075e-15
ENSG00000240583	AQP1	2.15507	4.06207e-144	1.96655e-141
ENSG00000161249	DMKN	2.15433	5.94409e-06	2.66267e-05
ENSG00000160716	CHRNB2	2.14864	0.000356915	0.00120601
ENSG00000184730	APOBR	2.14818	0.000280022	0.000961801
ENSG00000092068	SLC7A8	2.14804	2.95155e-06	1.37462e-05
ENSG00000167895	TMC8	2.14186	5.10035e-05	0.00019833
ENSG00000180573	HIST1H2AC	2.13706	1.54796e-74	2.3981e-72
ENSG00000104953	TLE6	2.12572	1.23797e-05	5.29913e-05
ENSG00000261678	SCRT1	2.12564	0.0100075	0.0249254
ENSG00000225968	ELFN1	2.12363	2.01499e-07	1.09762e-06
ENSG00000104903	LYL1	2.1177	0.000183329	0.000648195
ENSG00000230666	CEACAM22P	2.11632	5.74955e-06	2.57911e-05
ENSG00000273047	RP4-583P15.14	2.11563	0.00299333	0.00838989
ENSG00000079385	CEACAM1	2.11546	4.21998e-05	0.000166333
ENSG00000185924	RTN4RL1	2.11433	0.00455845	0.0122996
ENSG00000143369	ECM1	2.11165	2.68265e-64	2.935e-62
ENSG00000119782	FKBP1B	2.11073	4.41861e-13	4.32809e-12
ENSG00000050730	TNIP3	2.11009	7.08228e-16	8.76347e-15
ENSG00000169933	FRMPD4	2.10678	1.49496e-05	6.3306e-05
ENSG00000181804	SLC9A9	2.1064	8.18763e-17	1.09272e-15
ENSG00000060718	COL11A1	2.09874	5.26686e-05	0.000204394
ENSG00000204936	CD177	2.08878	7.28759e-15	8.29166e-14
ENSG00000110492	MDK	2.08735	1.87099e-50	1.27577e-48
ENSG00000131386	GALNT15	2.08466	0.000235704	0.000818141
ENSG00000128342	LIF	2.08343	5.30228e-260	1.02679e-256
ENSG00000105523	FAM83E	2.08244	0.00450685	0.012174
ENSG00000174938	SEZ6L2	2.08086	1.67816e-117	6.13162e-115
ENSG00000250510	GPR162	2.07932	8.8734e-05	0.000330703
ENSG00000085465	OVGP1	2.07929	4.06389e-06	1.86045e-05
ENSG00000250130	RP11-616K22.1	2.07686	0.000104071	0.000383433
ENSG00000165269	AQP7	2.07034	0.00163334	0.00484151
ENSG00000174807	CD248	2.07015	0.00138638	0.00417531
ENSG00000136378	ADAMTS7	2.06726	1.53233e-24	3.42257e-23
ENSG00000104856	RELB	2.06433	8.95759e-41	4.22053e-39
ENSG00000137331	IER3	2.06051	1.62359e-116	5.82239e-114
ENSG00000125775	SDCBP2	2.05737	1.66795e-06	8.04678e-06
ENSG00000065534	MYLK	2.05511	1.21744e-95	2.91058e-93
ENSG00000165029	ABCA1	2.05092	5.67825e-91	1.2639e-88
ENSG00000163297	ANTXR2	2.04911	3.02214e-62	3.12961e-60
ENSG00000161544	CYGB	2.04904	6.12201e-06	2.74174e-05
ENSG00000171786	NHLH1	2.04621	1.28709e-07	7.187e-07
ENSG00000183153	GJD3	2.0452	0.00763131	0.0195141
ENSG00000105889	STEAP1B	2.04461	0.0109085	0.02691
ENSG00000070808	CAMK2A	2.03881	0.000523762	0.00171531
ENSG00000139200	PIANP	2.037	0.000644772	0.00207616
ENSG00000008056	SYN1	2.03373	0.00177	0.0052036
ENSG00000178031	ADAMTSL1	2.03159	0.000303915	0.00104017
ENSG00000159648	TEPP	2.03006	0.000314146	0.00107178
ENSG00000168993	CPLX1	2.02855	0.00104399	0.00321975
ENSG00000243130	PSG11	2.02797	0.00052933	0.00173209
ENSG00000180777	ANKRD30B	2.0279	2.01256e-14	2.20312e-13
ENSG00000118503	TNFAIP3	2.02769	1.65509e-214	1.88535e-211
ENSG00000254827	SLC22A18AS	2.0267	0.000109142	0.000400516
ENSG00000149418	ST14	2.02575	7.96072e-07	4.01248e-06
ENSG00000127084	FGD3	2.02129	2.95837e-09	1.99961e-08
ENSG00000233198	RNF224	2.01898	3.23033e-13	3.1916e-12
ENSG00000071203	MS4A12	2.01789	0.00196869	0.00573029
ENSG00000079931	MOXD1	2.01785	0.00160089	0.00475917
ENSG00000124249	KCNK15	2.01385	5.91664e-31	1.89695e-29
ENSG00000124145	SDC4	2.01337	4.51796e-150	2.65122e-147
ENSG00000196684	HSH2D	2.0079	1.33338e-05	5.67491e-05
ENSG00000099889	ARVCF	2.00372	8.75831e-18	1.2695e-16
ENSG00000105559	PLEKHA4	2.00177	7.64267e-20	1.26496e-18
ENSG00000064270	ATP2C2	1.99839	1.63478e-10	1.25576e-09
ENSG00000073282	TP63	1.99543	2.01381e-14	2.20325e-13
ENSG00000182870	GALNT9	1.98847	0.00782289	0.0199487
ENSG00000012779	ALOX5	1.98833	0.000369377	0.00124443
ENSG00000138316	ADAMTS14	1.98723	0.00803054	0.0204256
ENSG00000215559	ANKRD20A11P	1.98495	0.00414695	0.0113075
ENSG00000158525	CPA5	1.98369	0.000651657	0.00209658
ENSG00000113070	HBEGF	1.9785	3.73065e-69	4.8486e-67
ENSG00000067715	SYT1	1.97807	1.50917e-10	1.16342e-09
ENSG00000187122	SLIT1	1.97802	0.00252415	0.00719248
ENSG00000140511	HAPLN3	1.97285	2.7721e-18	4.14852e-17
ENSG00000186832	KRT16	1.96988	8.68257e-27	2.24483e-25
ENSG00000107984	DKK1	1.96711	1.38147e-66	1.63123e-64
ENSG00000181444	ZNF467	1.96211	0.00264165	0.00749641
ENSG00000054179	ENTPD2	1.96058	6.54107e-05	0.000249739
ENSG00000134198	TSPAN2	1.95958	4.79117e-23	9.69499e-22
ENSG00000081923	ATP8B1	1.95823	1.37185e-103	3.79513e-101
ENSG00000134070	IRAK2	1.95804	1.47189e-68	1.85085e-66
ENSG00000120051	CFAP58	1.95707	8.33593e-05	0.000312416
ENSG00000077092	RARB	1.95476	0.00161933	0.0048081
ENSG00000125637	PSD4	1.95226	1.7904e-48	1.14805e-46
ENSG00000101460	MAP1LC3A	1.94933	9.31876e-30	2.77201e-28
ENSG00000172183	ISG20	1.9488	2.90554e-22	5.64351e-21
ENSG00000050165	DKK3	1.94658	8.06021e-103	2.10927e-100
ENSG00000144460	NYAP2	1.94595	1.18346e-42	6.06288e-41
ENSG00000163701	IL17RE	1.94578	4.93735e-06	2.23653e-05
ENSG00000110900	TSPAN11	1.94432	0.00189654	0.00553442
ENSG00000204962	PCDHA8	1.93964	0.000550728	0.00179603
ENSG00000205277	MUC12	1.93943	8.75113e-20	1.44103e-18
ENSG00000137975	CLCA2	1.93518	0.000923604	0.00288245
ENSG00000267001	AC006538.4	1.92879	0.00444587	0.0120277
ENSG00000171219	CDC42BPG	1.92381	1.69782e-32	5.90273e-31
ENSG00000112297	AIM1	1.9183	5.8615e-58	5.255e-56
ENSG00000198569	SLC34A3	1.91808	3.23166e-08	1.95627e-07
ENSG00000173641	HSPB7	1.91623	3.61448e-09	2.42363e-08
ENSG00000172482	AGXT	1.91412	1.01299e-05	4.38457e-05
ENSG00000179168	GGN	1.9138	0.00314505	0.00876945
ENSG00000039068	CDH1	1.90947	5.27369e-15	6.077e-14
ENSG00000129990	SYT5	1.90815	2.12622e-05	8.75862e-05
ENSG00000174788	PCP2	1.90617	0.004645	0.0125174
ENSG00000179564	LSMEM2	1.89928	9.39925e-06	4.09118e-05
ENSG00000105327	BBC3	1.89789	9.50419e-26	2.28348e-24
ENSG00000204219	TCEA3	1.89597	3.96068e-45	2.2625e-43
ENSG00000110799	VWF	1.89199	7.08932e-06	3.14584e-05
ENSG00000173918	C1QTNF1	1.89166	1.37812e-71	1.90624e-69
ENSG00000174255	ZNF80	1.89077	0.000478729	0.00157717
ENSG00000185615	PDIA2	1.88836	4.61264e-05	0.000180634
ENSG00000167701	GPT	1.88601	6.76327e-05	0.000257817
ENSG00000038427	VCAN	1.88523	2.48437e-07	1.33787e-06
ENSG00000183066	WBP2NL	1.88179	1.78611e-05	7.46396e-05
ENSG00000100739	BDKRB1	1.88116	1.99768e-24	4.43637e-23
ENSG00000070729	CNGB1	1.87848	1.87689e-06	9.00989e-06
ENSG00000196754	S100A2	1.87746	1.34719e-99	3.43267e-97
ENSG00000178821	TMEM52	1.87696	1.83881e-05	7.67097e-05
ENSG00000213889	PPM1N	1.87048	1.62158e-07	8.95404e-07
ENSG00000041982	TNC	1.87027	1.53707e-137	6.92219e-135
ENSG00000125618	PAX8	1.86622	3.62165e-08	2.18009e-07
ENSG00000163131	CTSS	1.86343	1.08343e-16	1.43702e-15
ENSG00000173391	OLR1	1.86263	4.75823e-53	3.51691e-51
ENSG00000006071	ABCC8	1.86246	5.33596e-05	0.000206869
ENSG00000110628	SLC22A18	1.86131	9.41853e-30	2.79739e-28
ENSG00000140678	ITGAX	1.85946	3.89125e-06	1.78564e-05
ENSG00000185527	PDE6G	1.85613	0.000974627	0.00302515
ENSG00000103196	CRISPLD2	1.85299	1.7091e-50	1.17364e-48
ENSG00000211895	IGHA1	1.8525	1.65888e-18	2.52351e-17
ENSG00000217275	RP1-34B20.4	1.84907	0.00169716	0.00501303
ENSG00000224383	PRR29	1.84773	0.000637003	0.00205387
ENSG00000102032	RENBP	1.84511	5.05402e-08	2.98934e-07
ENSG00000162511	LAPTM5	1.84049	1.56971e-06	7.59938e-06
ENSG00000168243	GNG4	1.83899	8.40619e-09	5.43378e-08
ENSG00000099994	SUSD2	1.83698	1.54651e-22	3.0497e-21
ENSG00000276600	RAB7B	1.83683	4.2585e-05	0.000167716
ENSG00000170412	GPRC5C	1.83468	5.85511e-12	5.22026e-11
ENSG00000104368	PLAT	1.83207	5.80048e-24	1.25085e-22
ENSG00000229715	EEF1DP3	1.82645	0.000194683	0.000686203
ENSG00000158246	FAM46B	1.82568	1.19261e-31	4.02351e-30
ENSG00000170667	RASA4B	1.82364	1.07332e-32	3.76482e-31
ENSG00000103485	QPRT	1.82355	1.11546e-37	4.81087e-36
ENSG00000186577	C6orf1	1.82205	7.52304e-31	2.38435e-29
ENSG00000117115	PADI2	1.82161	1.48912e-07	8.25325e-07
ENSG00000198542	ITGBL1	1.81915	3.0898e-11	2.55483e-10
ENSG00000163975	MELTF	1.81897	4.40942e-51	3.07153e-49
ENSG00000267795	SMIM22	1.8168	0.000241092	0.000835793
ENSG00000136367	ZFHX2	1.8167	0.00221	0.00637328
ENSG00000163874	ZC3H12A	1.81619	9.26908e-108	2.80462e-105
ENSG00000170786	SDR16C5	1.81568	4.11876e-05	0.000162808
ENSG00000164125	FAM198B	1.81311	0.000848566	0.00266761
ENSG00000178726	THBD	1.81138	7.84688e-47	4.70448e-45
ENSG00000227158	AC073621.2	1.80944	0.00768523	0.019639
ENSG00000204956	PCDHGA1	1.80678	8.20497e-06	3.60375e-05
ENSG00000008735	MAPK8IP2	1.80315	5.0068e-10	3.65874e-09
ENSG00000244731	C4A	1.80257	1.23588e-25	2.93655e-24
ENSG00000161513	FDXR	1.79794	3.30582e-58	3.00551e-56
ENSG00000060140	STYK1	1.79439	5.67966e-12	5.0685e-11
ENSG00000128422	KRT17	1.79417	1.1888e-177	8.22179e-175
ENSG00000278558	TMEM191B	1.79318	0.0101134	0.0251504
ENSG00000204396	VWA7	1.7883	2.6011e-35	1.0014e-33
ENSG00000279152	AC129492.1	1.78612	0.00771665	0.0197066
ENSG00000125744	RTN2	1.78249	8.75114e-28	2.3768e-26
ENSG00000115598	IL1RL2	1.77937	2.05569e-11	1.73306e-10
ENSG00000111291	GPRC5D	1.77923	4.04767e-10	2.98602e-09
ENSG00000067141	NEO1	1.77715	7.77735e-18	1.12985e-16
ENSG00000188629	ZNF177	1.7763	0.00490282	0.0131446
ENSG00000189233	NUGGC	1.77539	1.83267e-07	1.00452e-06
ENSG00000102316	MAGED2	1.77457	1.1202e-235	1.54947e-232
ENSG00000167656	LY6D	1.77445	9.87315e-05	0.000365291
ENSG00000259205	PRKXP1	1.7739	0.00267456	0.00757871
ENSG00000073734	ABCB11	1.7726	0.000114126	0.000417384
ENSG00000174502	SLC26A9	1.77129	0.000190897	0.000673847
ENSG00000182902	SLC25A18	1.77093	1.70097e-06	8.20014e-06
ENSG00000105464	GRIN2D	1.7702	2.59323e-06	1.21799e-05
ENSG00000056558	TRAF1	1.76988	1.24781e-18	1.91777e-17
ENSG00000261857	MIA	1.76959	0.00673428	0.0174976
ENSG00000187017	ESPN	1.76915	0.00416689	0.0113538
ENSG00000137094	DNAJB5	1.76796	9.73603e-63	1.03026e-60
ENSG00000130176	CNN1	1.76471	1.14128e-28	3.21235e-27
ENSG00000122861	PLAU	1.76231	2.42671e-54	1.90256e-52
ENSG00000255819	KLRC4-KLRK1	1.76113	0.00872836	0.0220228
ENSG00000224321	RPL12P14	1.76087	2.23812e-15	2.65897e-14
ENSG00000082126	MPP4	1.75707	0.00045767	0.00151397
ENSG00000250644	RP11-295K3.1	1.75643	1.4737e-07	8.17714e-07
ENSG00000165548	TMEM63C	1.75238	3.07416e-22	5.95907e-21
ENSG00000136918	WDR38	1.75067	0.00309501	0.00864363
ENSG00000260799	KRT8P50	1.74972	0.00450514	0.0121711
ENSG00000028277	POU2F2	1.74753	2.95126e-05	0.000119338
ENSG00000180596	HIST1H2BC	1.7467	1.77696e-10	1.3585e-09
ENSG00000145107	TM4SF19	1.74563	1.82235e-11	1.54577e-10
ENSG00000115423	DNAH6	1.74563	0.00109097	0.00335184
ENSG00000153303	FRMD1	1.74312	0.00753864	0.0193052
ENSG00000115414	FN1	1.73949	1.03527e-258	1.82255e-255
ENSG00000187908	DMBT1	1.7376	6.67524e-31	2.12959e-29
ENSG00000135205	CCDC146	1.73148	0.000519865	0.00170342
ENSG00000204616	TRIM31	1.73134	0.00772804	0.0197257
ENSG00000198829	SUCNR1	1.72943	0.0129233	0.0312668
ENSG00000266714	MYO15B	1.72358	3.60947e-37	1.53284e-35
ENSG00000162745	OLFML2B	1.72164	1.02026e-11	8.91177e-11
ENSG00000255872	RP11-613M10.9	1.71669	0.00544451	0.0144251
ENSG00000198959	TGM2	1.71614	2.92339e-179	2.17737e-176
ENSG00000177839	PCDHB9	1.71228	8.55357e-06	3.73989e-05
ENSG00000165757	KIAA1462	1.71193	0.00107605	0.00330968
ENSG00000099834	CDHR5	1.71102	0.00402377	0.0110104
ENSG00000271680	RP11-564A8.8	1.71049	0.00907765	0.0228445
ENSG00000179862	CITED4	1.71021	6.59875e-19	1.03219e-17
ENSG00000142694	EVA1B	1.70998	1.6734e-08	1.04635e-07
ENSG00000141574	SECTM1	1.70832	2.83077e-76	4.53041e-74
ENSG00000158683	PKD1L1	1.70549	0.011232	0.0276166
ENSG00000169583	CLIC3	1.70537	7.9094e-18	1.14817e-16
ENSG00000171631	P2RY6	1.70449	8.45935e-13	8.10164e-12
ENSG00000077150	NFKB2	1.70082	3.17091e-90	6.9778e-88
ENSG00000264187	RP11-45M22.4	1.70036	0.000418664	0.00139519
ENSG00000134321	RSAD2	1.70005	6.83604e-06	3.03972e-05
ENSG00000272869	CTC-487M23.8	1.69705	1.9018e-19	3.06904e-18
ENSG00000134061	CD180	1.69599	2.16192e-05	8.89811e-05
ENSG00000167749	KLK4	1.69597	0.00475925	0.0127937
ENSG00000084628	NKAIN1	1.69463	2.57753e-09	1.7526e-08
ENSG00000271079	CTAGE15	1.69369	0.00690543	0.0178847
ENSG00000253882	RP11-61L23.2	1.69145	1.11073e-13	1.14961e-12
ENSG00000154263	ABCA10	1.6899	6.28152e-06	2.80668e-05
ENSG00000169247	SH3TC2	1.68797	9.24858e-30	2.75537e-28
ENSG00000236969	GGT8P	1.68794	7.04873e-07	3.57795e-06
ENSG00000117152	RGS4	1.68792	0.00110498	0.00339058
ENSG00000006756	ARSD	1.68668	1.7768e-05	7.42985e-05
ENSG00000259823	LYPD8	1.68185	0.00107974	0.0033205
ENSG00000185614	FAM212A	1.6785	0.000655136	0.00210651
ENSG00000160326	SLC2A6	1.67306	1.19556e-42	6.10872e-41
ENSG00000113504	SLC12A7	1.67264	3.84931e-116	1.35531e-113
ENSG00000124749	COL21A1	1.6705	0.000843204	0.00265291
ENSG00000213999	MEF2B	1.66809	0.00823115	0.0208798
ENSG00000175482	POLD4	1.66782	2.03366e-35	7.90799e-34
ENSG00000188766	SPRED3	1.66657	1.149e-05	4.94013e-05
ENSG00000139679	LPAR6	1.66341	0.00071238	0.00227419
ENSG00000071282	LMCD1	1.66315	3.53111e-11	2.90361e-10
ENSG00000162241	SLC25A45	1.65727	7.38606e-49	4.84851e-47
ENSG00000179954	SSC5D	1.65571	3.14971e-52	2.2759e-50
ENSG00000275342	SGK223	1.65529	5.74557e-92	1.30898e-89
ENSG00000196132	MYT1	1.65445	0.00987817	0.024635
ENSG00000262655	SPON1	1.65384	5.00186e-05	0.00019493
ENSG00000099377	HSD3B7	1.65362	8.94911e-65	9.95975e-63
ENSG00000164520	RAET1E	1.65308	1.0235e-76	1.69402e-74
ENSG00000163376	KBTBD8	1.65021	1.69153e-16	2.21029e-15
ENSG00000186481	ANKRD20A5P	1.64984	3.5974e-05	0.000143548
ENSG00000006659	LGALS14	1.64945	0.00866754	0.0218768
ENSG00000142173	COL6A2	1.64785	1.85605e-10	1.41729e-09
ENSG00000144063	MALL	1.64665	2.75099e-63	2.9596e-61
ENSG00000187689	AMTN	1.64485	3.34092e-12	3.02888e-11
ENSG00000130518	KIAA1683	1.64193	4.4436e-07	2.31442e-06
ENSG00000142621	FHAD1	1.63827	0.000238351	0.000826885
ENSG00000151490	PTPRO	1.63703	5.08713e-06	2.29847e-05
ENSG00000124140	SLC12A5	1.63652	0.000125675	0.000455835
ENSG00000011083	SLC6A7	1.63451	0.00120289	0.00366258
ENSG00000175938	ORAI3	1.63448	1.0418e-15	1.26963e-14
ENSG00000198753	PLXNB3	1.63413	5.24514e-29	1.50477e-27
ENSG00000186300	ZNF555	1.6328	1.85239e-23	3.87381e-22
ENSG00000213928	IRF9	1.6327	4.62414e-31	1.48748e-29
ENSG00000175003	SLC22A1	1.63215	2.43917e-06	1.15066e-05
ENSG00000125966	MMP24	1.62481	3.57958e-08	2.1561e-07
ENSG00000099785	MARCH2	1.62409	1.63217e-19	2.64494e-18
ENSG00000214940	NPIPA8	1.62287	0.00115982	0.00354258
ENSG00000214223	HNRNPA1P10	1.62112	0.00821185	0.0208335
ENSG00000165507	C10orf10	1.6204	3.93881e-07	2.06596e-06
ENSG00000161921	CXCL16	1.61906	1.20844e-15	1.46625e-14
ENSG00000169169	CPT1C	1.61791	9.55023e-08	5.44324e-07
ENSG00000070182	SPTB	1.61654	3.06157e-07	1.62967e-06
ENSG00000117245	KIF17	1.61445	0.00130065	0.00393547
ENSG00000213030	CGB8	1.61384	0.000366284	0.0012353
ENSG00000197714	ZNF460	1.61284	1.35516e-21	2.51607e-20
ENSG00000106665	CLIP2	1.611	1.7765e-46	1.05527e-44
ENSG00000118046	STK11	1.61044	2.2833e-08	1.40458e-07
ENSG00000225950	NTF4	1.60994	0.00814647	0.0206894
ENSG00000119714	GPR68	1.60867	0.00599328	0.0157476
ENSG00000127129	EDN2	1.60324	1.14756e-17	1.64246e-16
ENSG00000188818	ZDHHC11	1.60254	7.41516e-16	9.15782e-15
ENSG00000184292	TACSTD2	1.60229	9.47841e-83	1.87295e-80
ENSG00000148677	ANKRD1	1.60171	6.55906e-49	4.32028e-47
ENSG00000145936	KCNMB1	1.60133	1.19444e-09	8.41103e-09
ENSG00000062524	LTK	1.59929	0.00563719	0.0148824
ENSG00000084636	COL16A1	1.59901	5.14965e-66	5.93589e-64
ENSG00000162078	ZG16B	1.59826	2.38301e-09	1.62546e-08
ENSG00000099365	STX1B	1.59808	5.71135e-10	4.15634e-09
ENSG00000197903	HIST1H2BK	1.59771	2.42387e-43	1.28247e-41
ENSG00000137573	SULF1	1.59648	7.87883e-21	1.38956e-19
ENSG00000262576	PCDHGA4	1.59619	0.00205253	0.00595355
ENSG00000179630	LACC1	1.59277	2.44485e-22	4.77746e-21
ENSG00000106952	TNFSF8	1.59054	0.0153967	0.0364762
ENSG00000248769	RP11-974F13.5	1.59037	0.0112508	0.0276593
ENSG00000187688	TRPV2	1.58995	0.00677071	0.0175757
ENSG00000168477	TNXB	1.5893	2.2986e-37	9.82614e-36
ENSG00000163909	HEYL	1.58866	0.00330962	0.00918997
ENSG00000132688	NES	1.5885	4.58599e-71	6.16719e-69
ENSG00000181885	CLDN7	1.58795	8.3352e-09	5.39115e-08
ENSG00000271503	CCL5	1.58767	2.04398e-12	1.88754e-11
ENSG00000228206	AC016717.1	1.58627	3.15454e-06	1.46353e-05
ENSG00000124102	PI3	1.58489	3.92175e-09	2.61878e-08
ENSG00000197457	STMN3	1.58256	1.28893e-73	1.92001e-71
ENSG00000109321	AREG	1.58176	7.39266e-12	6.52204e-11
ENSG00000145358	DDIT4L	1.5817	1.93245e-06	9.26056e-06
ENSG00000184564	SLITRK6	1.5805	6.8241e-12	6.0397e-11
ENSG00000130589	HELZ2	1.57823	3.94183e-33	1.39805e-31
ENSG00000130066	SAT1	1.57822	1.22861e-94	2.90147e-92
ENSG00000112499	SLC22A2	1.57761	1.8089e-05	7.55267e-05
ENSG00000172000	ZNF556	1.57673	4.84768e-42	2.40706e-40
ENSG00000242252	BGLAP	1.57654	0.00559964	0.0147976
ENSG00000095303	PTGS1	1.57601	1.52054e-21	2.80164e-20
ENSG00000279718	SNX18P12	1.57559	0.00047757	0.00157388
ENSG00000126353	CCR7	1.57309	0.00256769	0.00730064
ENSG00000143632	ACTA1	1.57264	0.00703611	0.0181745
ENSG00000204538	PSORS1C2	1.57248	0.00539477	0.014307
ENSG00000114378	HYAL1	1.57156	7.64578e-30	2.29551e-28
ENSG00000176749	CDK5R1	1.56774	1.56488e-12	1.45832e-11
ENSG00000153531	ADPRHL1	1.56726	1.38172e-36	5.68088e-35
ENSG00000135094	SDS	1.56225	0.00176114	0.00518069
ENSG00000250011	HMGB1P3	1.56188	0.000203019	0.000713257
ENSG00000183018	SPNS2	1.56032	2.99967e-06	1.39569e-05
ENSG00000008323	PLEKHG6	1.55992	1.39371e-05	5.92517e-05
ENSG00000172006	ZNF554	1.55946	8.40972e-22	1.58882e-20
ENSG00000143469	SYT14	1.5583	0.00123002	0.00373872
ENSG00000182162	P2RY8	1.55592	0.000525309	0.0017198
ENSG00000270149	RP11-544M22.13	1.55558	8.02502e-16	9.8795e-15
ENSG00000169885	CALML6	1.55539	0.00710396	0.0183204
ENSG00000131037	EPS8L1	1.55313	1.22821e-08	7.79301e-08
ENSG00000144488	ESPNL	1.55244	5.58804e-11	4.50885e-10
ENSG00000115112	TFCP2L1	1.552	0.00237076	0.00679825
ENSG00000274143	KIR2DL5A	1.55151	9.46376e-05	0.000351218
ENSG00000112096	SOD2	1.55141	2.51456e-198	2.21338e-195
ENSG00000183260	ABHD16B	1.54759	0.00010859	0.00039887
ENSG00000100271	TTLL1	1.54464	6.35706e-05	0.000243242
ENSG00000047457	CP	1.54449	0.00474726	0.0127699
ENSG00000054392	HHAT	1.54224	2.29224e-27	6.13111e-26
ENSG00000223572	CKMT1A	1.54064	3.10243e-09	2.09333e-08
ENSG00000172264	MACROD2	1.53982	6.80751e-07	3.46368e-06
ENSG00000105767	CADM4	1.53831	5.1945e-17	7.05905e-16
ENSG00000171443	ZNF524	1.53812	9.40328e-09	6.04363e-08
ENSG00000128917	DLL4	1.53794	0.0150183	0.0357065
ENSG00000188015	S100A3	1.53653	1.09989e-42	5.64971e-41
ENSG00000184939	ZFP90	1.53555	3.35836e-28	9.26421e-27
ENSG00000153029	MR1	1.53383	6.38011e-47	3.83698e-45
ENSG00000188760	TMEM198	1.53146	2.21577e-09	1.51781e-08
ENSG00000164638	SLC29A4	1.53082	4.46798e-08	2.65896e-07
ENSG00000181031	RPH3AL	1.53003	1.75555e-17	2.47605e-16
ENSG00000184545	DUSP8	1.5296	6.35723e-16	7.90672e-15
ENSG00000100181	TPTEP1	1.52922	2.54248e-15	3.00214e-14
ENSG00000259381	RP11-192M23.1	1.52909	0.0130309	0.03148
ENSG00000186326	RGS9BP	1.52712	0.00633321	0.0165487
ENSG00000135636	DYSF	1.52662	6.04649e-08	3.53961e-07
ENSG00000263020	XXbac-BPG32J3.22	1.52609	0.00752282	0.0192698
ENSG00000145526	CDH18	1.52486	0.00153446	0.0045828
ENSG00000186529	CYP4F3	1.52484	1.41252e-16	1.85825e-15
ENSG00000179362	HMGN2P46	1.52469	0.000983804	0.00305066
ENSG00000125730	C3	1.5233	4.76266e-168	3.1803e-165
ENSG00000130775	THEMIS2	1.52245	1.85862e-05	7.74525e-05
ENSG00000129226	CD68	1.52116	4.30576e-39	1.96653e-37
ENSG00000143365	RORC	1.52105	1.44027e-10	1.11296e-09
ENSG00000277224	HIST1H2BF	1.51748	0.000118381	0.000431722
ENSG00000147488	ST18	1.51656	0.00010886	0.000399785
ENSG00000196092	PAX5	1.51603	0.000626544	0.00202318
ENSG00000054938	CHRDL2	1.51412	8.69597e-05	0.000324917
ENSG00000214787	MS4A4E	1.5125	0.000933985	0.00290893
ENSG00000184206	GOLGA6L4	1.51204	1.13682e-05	4.89103e-05
ENSG00000142552	RCN3	1.51078	3.02331e-12	2.75383e-11
ENSG00000160678	S100A1	1.51072	1.665e-05	6.99713e-05
ENSG00000168140	VASN	1.50952	1.88709e-67	2.31288e-65
ENSG00000140481	CCDC33	1.50799	0.00244624	0.0069921
ENSG00000150471	ADGRL3	1.50751	0.000162324	0.000579001
ENSG00000198626	RYR2	1.50643	1.80152e-05	7.52513e-05
ENSG00000137501	SYTL2	1.50508	4.99906e-06	2.26131e-05
ENSG00000132334	PTPRE	1.50465	3.91419e-21	7.01837e-20
ENSG00000261150	EPPK1	1.50228	4.24775e-12	3.81883e-11
ENSG00000234289	H2BFS	1.49497	4.53645e-23	9.19878e-22
ENSG00000168016	TRANK1	1.49475	7.44178e-49	4.86858e-47
ENSG00000260458	KCNJ18	1.49207	0.000468678	0.00154721
ENSG00000185269	NOTUM	1.4917	0.000752625	0.00239123
ENSG00000169442	CD52	1.49003	0.00634963	0.0165894
ENSG00000149591	TAGLN	1.49002	1.21967e-132	5.24865e-130
ENSG00000153294	ADGRF4	1.48924	7.17413e-07	3.63874e-06
ENSG00000027075	PRKCH	1.48751	4.90867e-26	1.20783e-24
ENSG00000178685	PARP10	1.48591	8.27149e-35	3.14073e-33
ENSG00000135423	GLS2	1.48548	0.00329638	0.00915975
ENSG00000183486	MX2	1.48424	9.26809e-08	5.2865e-07
ENSG00000118194	TNNT2	1.48374	1.46026e-08	9.20808e-08
ENSG00000196967	ZNF585A	1.48298	6.40815e-36	2.5377e-34
ENSG00000237289	CKMT1B	1.48202	8.35046e-10	5.98913e-09
ENSG00000182578	CSF1R	1.48118	0.00132326	0.00399765
ENSG00000120324	PCDHB10	1.48057	2.55191e-06	1.19975e-05
ENSG00000092969	TGFB2	1.48011	1.05232e-76	1.72697e-74
ENSG00000172927	MYEOV	1.48005	8.97751e-33	3.1609e-31
ENSG00000116663	FBXO6	1.47803	0.00113277	0.00346817
ENSG00000205867	KRTAP5-2	1.47684	0.0156984	0.0371184
ENSG00000181856	SLC2A4	1.47669	0.00115946	0.00354231
ENSG00000175793	SFN	1.47384	1.19774e-146	6.10377e-144
ENSG00000244482	LILRA6	1.47236	0.000395936	0.00132606
ENSG00000187837	HIST1H1C	1.4682	3.51673e-56	2.86141e-54
ENSG00000184584	TMEM173	1.46676	3.57584e-54	2.78097e-52
ENSG00000132109	TRIM21	1.46675	8.03797e-54	6.08028e-52
ENSG00000173702	MUC13	1.46665	0.000120346	0.000438146
ENSG00000163888	CAMK2N2	1.4658	0.00329399	0.00915445
ENSG00000105808	RASA4	1.46466	3.11924e-32	1.07679e-30
ENSG00000137752	CASP1	1.46133	2.78755e-07	1.49201e-06
ENSG00000180251	SLC9A4	1.45972	0.00184344	0.00539328
ENSG00000085741	WNT11	1.45927	0.00051969	0.00170313
ENSG00000070540	WIPI1	1.45762	8.55455e-30	2.56041e-28
ENSG00000172638	EFEMP2	1.45695	5.00572e-07	2.58771e-06
ENSG00000135477	KRT87P	1.45632	1.58286e-11	1.35509e-10
ENSG00000117020	AKT3	1.45532	1.30056e-05	5.5482e-05
ENSG00000244242	IFITM10	1.45499	0.00417676	0.0113775
ENSG00000205078	SYCE1L	1.45445	0.00393138	0.0107758
ENSG00000129295	LRRC6	1.45372	1.6725e-05	7.02557e-05
ENSG00000170271	FAXDC2	1.45225	4.01054e-13	3.93435e-12
ENSG00000155749	ALS2CR12	1.44977	1.00201e-05	4.34188e-05
ENSG00000204592	HLA-E	1.44928	6.49679e-104	1.82334e-101
ENSG00000242574	HLA-DMB	1.44701	0.000998956	0.00309269
ENSG00000128849	CGNL1	1.44687	1.4813e-07	8.21457e-07
ENSG00000171970	ZNF57	1.44531	3.89715e-20	6.55675e-19
ENSG00000163814	CDCP1	1.44496	3.23659e-135	1.42447e-132
ENSG00000204965	PCDHA5	1.4442	0.0135576	0.032614
ENSG00000100253	MIOX	1.44391	0.00850612	0.0215125
ENSG00000164867	NOS3	1.44197	0.00156785	0.00467171
ENSG00000198517	MAFK	1.43812	5.01002e-36	2.00452e-34
ENSG00000170381	SEMA3E	1.43797	0.003022	0.00846168
ENSG00000213033	AURKAPS1	1.43706	0.00162739	0.0048261
ENSG00000223703	AC027612.4	1.43312	1.94171e-05	8.06028e-05
ENSG00000138131	LOXL4	1.43265	4.54897e-29	1.30893e-27
ENSG00000114670	NEK11	1.42965	2.19291e-05	9.01416e-05
ENSG00000241157	RP11-3K24.1	1.42945	0.010868	0.0268178
ENSG00000119632	IFI27L2	1.42816	7.62038e-22	1.44251e-20
ENSG00000013588	GPRC5A	1.42779	3.11719e-103	8.50203e-101
ENSG00000141968	VAV1	1.4255	0.00270534	0.00765808
ENSG00000124313	IQSEC2	1.42498	1.53643e-42	7.80917e-41
ENSG00000187608	ISG15	1.42416	3.67589e-43	1.92388e-41
ENSG00000161677	JOSD2	1.42133	1.73868e-10	1.33029e-09
ENSG00000118292	C1orf54	1.41841	0.000100614	0.000371619
ENSG00000197406	DIO3	1.41455	0.0126754	0.0307236
ENSG00000278704	BX004987.1	1.41442	5.23993e-16	6.57999e-15
ENSG00000132297	HHLA1	1.41235	2.22176e-85	4.57706e-83
ENSG00000173530	TNFRSF10D	1.41074	1.03549e-68	1.3106e-66
ENSG00000167608	TMC4	1.40897	1.78929e-05	7.47565e-05
ENSG00000263155	MYZAP	1.40868	7.82162e-08	4.51194e-07
ENSG00000228767	KRT8P18	1.40823	0.0125465	0.0304522
ENSG00000126709	IFI6	1.40801	2.54827e-05	0.000103911
ENSG00000158373	HIST1H2BD	1.40716	5.35562e-17	7.26271e-16
ENSG00000249072	RP11-777B9.5	1.40623	0.00158526	0.00471777
ENSG00000132464	ENAM	1.40571	0.00766964	0.0196069
ENSG00000173267	SNCG	1.4043	5.29864e-73	7.7149e-71
ENSG00000148180	GSN	1.4034	1.14005e-108	3.61919e-106
ENSG00000006837	CDKL3	1.40314	7.51262e-09	4.89673e-08
ENSG00000174871	CNIH2	1.40218	0.00219801	0.00634155
ENSG00000174343	CHRNA9	1.40197	2.89359e-05	0.000117129
ENSG00000178078	STAP2	1.40035	4.01977e-05	0.000159058
ENSG00000256566	RP4-734P14.4	1.3989	0.0125488	0.0304522
ENSG00000179284	DAND5	1.39689	0.00143948	0.00432448
ENSG00000205176	REXO1L1P	1.39648	9.38824e-06	4.0873e-05
ENSG00000109743	BST1	1.39594	1.38288e-05	5.88043e-05
ENSG00000130208	APOC1	1.39068	0.000119542	0.000435413
ENSG00000232815	DUX4L50	1.39033	0.00273749	0.00774005
ENSG00000010295	IFFO1	1.38979	0.00188897	0.00551674
ENSG00000256514	AP003419.11	1.38633	1.41951e-17	2.01678e-16
ENSG00000159166	LAD1	1.38487	0.00803304	0.0204281
ENSG00000101335	MYL9	1.3846	5.22724e-113	1.77589e-110
ENSG00000169220	RGS14	1.38187	2.47425e-11	2.06614e-10
ENSG00000188549	C15orf52	1.38069	2.49642e-77	4.16752e-75
ENSG00000117016	RIMS3	1.37944	8.26738e-05	0.000310027
ENSG00000104381	GDAP1	1.37916	2.58559e-47	1.58449e-45
ENSG00000139287	TPH2	1.37911	3.404e-07	1.80154e-06
ENSG00000275395	FCGBP	1.37897	0.0018127	0.00531358
ENSG00000142765	SYTL1	1.3779	8.87309e-05	0.000330703
ENSG00000162772	ATF3	1.37777	2.89592e-79	5.19255e-77
ENSG00000217733	CCT7P1	1.37699	0.00367935	0.0101323
ENSG00000132000	PODNL1	1.3764	3.80558e-08	2.28441e-07
ENSG00000213760	ATP6V1G2	1.37425	0.000427134	0.00142219
ENSG00000213213	CCDC183	1.3727	1.2223e-09	8.58845e-09
ENSG00000185291	IL3RA	1.37141	0.00199384	0.00579567
ENSG00000197753	LHFPL5	1.37105	0.000433363	0.0014407
ENSG00000108370	RGS9	1.36995	0.000471057	0.00155427
ENSG00000103227	LMF1	1.36894	0.0120895	0.0294778
ENSG00000101076	HNF4A	1.36711	0.00141054	0.00424478
ENSG00000132010	ZNF20	1.36627	8.47157e-05	0.000317131
ENSG00000117226	GBP3	1.36539	2.38136e-35	9.2046e-34
ENSG00000168079	SCARA5	1.3621	0.00142471	0.00428474
ENSG00000176761	ZNF285B	1.36184	0.0133892	0.032249
ENSG00000105699	LSR	1.36112	2.14837e-17	3.00601e-16
ENSG00000144730	IL17RD	1.36024	3.81635e-05	0.000151691
ENSG00000085063	CD59	1.35884	2.31996e-122	8.80901e-120
ENSG00000094755	GABRP	1.35882	8.50592e-62	8.66932e-60
ENSG00000222046	DCDC2B	1.35725	0.0123286	0.0300042
ENSG00000079435	LIPE	1.35605	5.1919e-07	2.67681e-06
ENSG00000219891	ZSCAN12P1	1.35585	0.00285707	0.00804992
ENSG00000196878	LAMB3	1.35284	5.68977e-123	2.20365e-120
ENSG00000100031	GGT1	1.35181	3.8006e-57	3.22801e-55
ENSG00000104327	CALB1	1.35151	4.71352e-38	2.0558e-36
ENSG00000107159	CA9	1.35097	4.47289e-06	2.03375e-05
ENSG00000187601	MAGEH1	1.35043	0.0118214	0.0289005
ENSG00000025708	TYMP	1.35029	2.78351e-23	5.72823e-22
ENSG00000168899	VAMP5	1.34997	0.00255662	0.00727538
ENSG00000198121	LPAR1	1.34952	3.57611e-16	4.55301e-15
ENSG00000273597	RP11-392A14.9	1.34826	0.00741648	0.0190259
ENSG00000137801	THBS1	1.34741	1.25115e-106	3.67099e-104
ENSG00000126231	PROZ	1.34735	0.00414052	0.0112915
ENSG00000161642	ZNF385A	1.34621	9.11987e-44	4.96085e-42
ENSG00000256087	ZNF432	1.34598	4.77456e-31	1.53332e-29
ENSG00000103145	HCFC1R1	1.34506	3.36411e-85	6.85748e-83
ENSG00000135951	TSGA10	1.34475	5.86173e-06	2.62699e-05
ENSG00000174827	PDZK1	1.34319	6.37562e-08	3.7244e-07
ENSG00000008517	IL32	1.34243	3.59506e-57	3.06689e-55
ENSG00000170634	ACYP2	1.34139	3.85072e-12	3.48129e-11
ENSG00000203722	RAET1G	1.34098	1.22003e-52	8.94917e-51
ENSG00000100918	REC8	1.34062	5.46212e-10	3.98395e-09
ENSG00000204524	ZNF805	1.34044	2.93494e-11	2.43405e-10
ENSG00000168497	SDPR	1.33943	2.86537e-12	2.61612e-11
ENSG00000133195	SLC39A11	1.33793	8.64663e-20	1.42625e-18
ENSG00000171608	PIK3CD	1.33695	4.355e-15	5.05603e-14
ENSG00000083799	CYLD	1.33681	1.20952e-96	2.9278e-94
ENSG00000142609	CFAP74	1.33674	0.000100666	0.000371739
ENSG00000213376	GAPDHP71	1.33593	0.0026018	0.00738926
ENSG00000028137	TNFRSF1B	1.33556	4.12964e-06	1.88832e-05
ENSG00000142920	AZIN2	1.33487	0.00021887	0.000764228
ENSG00000163545	NUAK2	1.33421	2.60468e-20	4.44794e-19
ENSG00000182866	LCK	1.33398	0.00418003	0.0113849
ENSG00000182612	TSPAN10	1.33118	4.79787e-05	0.000187471
ENSG00000164171	ITGA2	1.33099	1.03425e-68	1.3106e-66
ENSG00000102466	FGF14	1.33098	0.00436009	0.011822
ENSG00000103942	HOMER2	1.33083	9.29493e-08	5.30024e-07
ENSG00000019186	CYP24A1	1.33075	4.37669e-29	1.26499e-27
ENSG00000137440	FGFBP1	1.32859	0.000397611	0.00133052
ENSG00000147082	CCNB3	1.32771	0.00688332	0.0178369
ENSG00000158769	F11R	1.3273	3.18546e-42	1.59051e-40
ENSG00000274290	HIST1H2BE	1.3261	0.0007848	0.00248409
ENSG00000142677	IL22RA1	1.32502	1.03268e-07	5.84389e-07
ENSG00000089356	FXYD3	1.32365	0.000227618	0.00079263
ENSG00000135679	MDM2	1.32346	2.91533e-149	1.66045e-146
ENSG00000259207	ITGB3	1.32267	1.61782e-26	4.08462e-25
ENSG00000260325	HSPB9	1.32134	0.00994366	0.0247861
ENSG00000276180	HIST1H4I	1.32034	2.33642e-18	3.51825e-17
ENSG00000170917	NUDT6	1.31972	8.64771e-29	2.45907e-27
ENSG00000280013	CH507-42P11.2	1.31867	0.0109985	0.0271078
ENSG00000182179	UBA7	1.31859	4.83174e-07	2.5058e-06
ENSG00000280004	AC005086.2	1.3175	0.0153426	0.0363569
ENSG00000206140	TMEM191C	1.317	0.00448283	0.0121209
ENSG00000134574	DDB2	1.31603	1.29992e-129	5.35594e-127
ENSG00000272896	RP11-216L13.17	1.31511	0.015326	0.0363354
ENSG00000115604	IL18R1	1.31393	0.00387303	0.0106264
ENSG00000053108	FSTL4	1.31322	1.37653e-57	1.20618e-55
ENSG00000182310	SPACA6	1.31094	2.04233e-22	4.00706e-21
ENSG00000162576	MXRA8	1.31087	1.97053e-08	1.22227e-07
ENSG00000161638	ITGA5	1.30918	1.23041e-148	6.61857e-146
ENSG00000108823	SGCA	1.30889	0.00905083	0.022783
ENSG00000241278	ENPP7P4	1.308	0.00162234	0.00481481
ENSG00000204257	HLA-DMA	1.30775	6.93428e-09	4.53198e-08
ENSG00000110013	SIAE	1.30733	1.44748e-29	4.27946e-28
ENSG00000173805	HAP1	1.30643	5.16369e-07	2.66511e-06
ENSG00000188910	GJB3	1.3028	1.19391e-26	3.04611e-25
ENSG00000087074	PPP1R15A	1.30162	2.83982e-69	3.71575e-67
ENSG00000234409	CCDC188	1.30098	0.0072374	0.0186274
ENSG00000157542	KCNJ6	1.29883	6.56567e-05	0.00025058
ENSG00000010438	PRSS3	1.29711	0.00455615	0.0122965
ENSG00000159618	ADGRG5	1.29538	0.010978	0.0270676
ENSG00000090238	YPEL3	1.29503	4.68153e-12	4.20101e-11
ENSG00000108551	RASD1	1.29352	0.00276025	0.00779755
ENSG00000154451	GBP5	1.29327	0.000518833	0.0017009
ENSG00000185972	CCIN	1.29172	3.43853e-07	1.81783e-06
ENSG00000105520	PLPPR2	1.29124	4.10423e-41	1.95279e-39
ENSG00000144339	TMEFF2	1.29093	0.00189419	0.00552924
ENSG00000154175	ABI3BP	1.29021	9.56683e-06	4.15944e-05
ENSG00000131650	KREMEN2	1.28974	0.000289508	0.000992797
ENSG00000149131	SERPING1	1.2889	0.00101019	0.00312199
ENSG00000178776	C5orf46	1.28749	2.7862e-20	4.74119e-19
ENSG00000116690	PRG4	1.28695	4.0906e-12	3.68611e-11
ENSG00000155918	RAET1L	1.28619	0.000224839	0.0007838
ENSG00000169026	MFSD7	1.28558	0.0063934	0.0166992
ENSG00000023608	SNAPC1	1.28523	1.01817e-49	6.82247e-48
ENSG00000164181	ELOVL7	1.28429	1.04083e-06	5.16019e-06
ENSG00000076864	RAP1GAP	1.28359	3.17795e-32	1.09504e-30
ENSG00000076344	RGS11	1.28334	9.96156e-05	0.000368281
ENSG00000063127	SLC6A16	1.28153	0.00625116	0.0163697
ENSG00000064205	WISP2	1.27745	5.77533e-109	1.86399e-106
ENSG00000100284	TOM1	1.27712	3.3175e-57	2.84263e-55
ENSG00000153487	ING1	1.27531	2.51732e-41	1.20663e-39
ENSG00000224081	LINC01057	1.27358	8.7767e-29	2.48845e-27
ENSG00000185101	ANO9	1.27314	8.01845e-05	0.000301685
ENSG00000168398	BDKRB2	1.27235	2.13879e-13	2.14711e-12
ENSG00000176597	B3GNT5	1.27138	1.95407e-18	2.95168e-17
ENSG00000144331	ZNF385B	1.26909	0.006595	0.0171633
ENSG00000243279	PRAF2	1.26869	1.44913e-72	2.0787e-70
ENSG00000174521	TTC9B	1.26851	0.0141026	0.0337448
ENSG00000001461	NIPAL3	1.26829	2.6581e-87	5.65649e-85
ENSG00000164877	MICALL2	1.26826	6.91318e-25	1.57129e-23
ENSG00000167772	ANGPTL4	1.2678	2.56576e-06	1.20568e-05
ENSG00000178404	CEP295NL	1.26778	0.0021866	0.00631146
ENSG00000172575	RASGRP1	1.26646	9.06084e-13	8.62651e-12
ENSG00000203814	HIST2H2BF	1.26548	0.000233934	0.000812436
ENSG00000101213	PTK6	1.26511	1.06795e-18	1.65051e-17
ENSG00000124508	BTN2A2	1.26392	4.44928e-29	1.28406e-27
ENSG00000185670	ZBTB3	1.26359	1.57336e-16	2.06005e-15
ENSG00000198125	MB	1.26251	0.00221692	0.00639039
ENSG00000117472	TSPAN1	1.26249	3.10953e-05	0.000125267
ENSG00000100100	PIK3IP1	1.26044	1.68547e-07	9.28301e-07
ENSG00000117595	IRF6	1.25881	0.0119621	0.0292076
ENSG00000159214	CCDC24	1.25834	3.1307e-11	2.58643e-10
ENSG00000172831	CES2	1.2576	2.88136e-56	2.3643e-54
ENSG00000103742	IGDCC4	1.25273	0.0130057	0.0314348
ENSG00000147100	SLC16A2	1.25235	1.26849e-06	6.21252e-06
ENSG00000156500	FAM122C	1.25219	8.24686e-12	7.24593e-11
ENSG00000173546	CSPG4	1.25065	1.17072e-47	7.24311e-46
ENSG00000174640	SLCO2A1	1.25034	8.50869e-48	5.31518e-46
ENSG00000243207	PPAN-P2RY11	1.24959	0.00198692	0.00577643
ENSG00000171557	FGG	1.24896	0.00326799	0.00908609
ENSG00000188916	FAM196A	1.24797	0.0147572	0.0351807
ENSG00000181722	ZBTB20	1.24787	1.67553e-25	3.94247e-24
ENSG00000197943	PLCG2	1.24712	4.57577e-12	4.10801e-11
ENSG00000237977	EIF4HP2	1.24664	0.00156443	0.00466295
ENSG00000238072	RP11-305M3.2	1.24654	0.00654388	0.0170417
ENSG00000117971	CHRNB4	1.24622	0.000260572	0.00089914
ENSG00000151715	TMEM45B	1.24585	1.57014e-06	7.59955e-06
ENSG00000155761	SPAG17	1.24547	0.0136671	0.0328408
ENSG00000148143	ZNF462	1.24535	1.09106e-22	2.17593e-21
ENSG00000103184	SEC14L5	1.24435	0.00154221	0.00460382
ENSG00000170379	TCAF2	1.24218	1.2805e-08	8.11151e-08
ENSG00000115616	SLC9A2	1.24021	1.0198e-19	1.67219e-18
ENSG00000171462	DLK2	1.2394	0.000775281	0.00245798
ENSG00000114268	PFKFB4	1.23921	5.83497e-45	3.29429e-43
ENSG00000101096	NFATC2	1.23908	8.42589e-31	2.66613e-29
ENSG00000168000	BSCL2	1.2387	5.53614e-30	1.67511e-28
ENSG00000120217	CD274	1.23749	2.82913e-05	0.000114687
ENSG00000237441	RGL2	1.23705	1.37561e-43	7.33849e-42
ENSG00000111863	ADTRP	1.23651	0.000373913	0.00125796
ENSG00000104691	UBXN8	1.23643	2.60943e-37	1.11303e-35
ENSG00000074527	NTN4	1.23632	1.83636e-57	1.60186e-55
ENSG00000203734	ECT2L	1.23444	0.0115006	0.0282268
ENSG00000179361	ARID3B	1.23341	6.21986e-22	1.18551e-20
ENSG00000258947	TUBB3	1.23229	5.37293e-46	3.13394e-44
ENSG00000248905	FMN1	1.23138	8.82627e-37	3.65997e-35
ENSG00000222009	BTBD19	1.23079	4.78713e-07	2.48467e-06
ENSG00000008516	MMP25	1.23026	0.00197316	0.00574073
ENSG00000133048	CHI3L1	1.22856	0.00746373	0.0191361
ENSG00000233902	XXbac-BPG181B23.6	1.22854	9.30132e-05	0.000345654
ENSG00000186866	POFUT2	1.22834	4.54138e-57	3.82365e-55
ENSG00000125746	EML2	1.22789	5.65486e-52	4.04083e-50
ENSG00000010030	ETV7	1.22708	0.00924281	0.0232029
ENSG00000176907	C8orf4	1.22498	2.51028e-88	5.40129e-86
ENSG00000185499	MUC1	1.22418	4.68756e-83	9.3582e-81
ENSG00000148154	UGCG	1.224	2.85525e-57	2.46839e-55
ENSG00000124224	PPP4R1L	1.22293	7.06269e-27	1.84077e-25
ENSG00000205464	ATP6AP1L	1.22248	2.20261e-05	9.04829e-05
ENSG00000169605	GKN1	1.22158	0.00323797	0.0090065
ENSG00000184678	HIST2H2BE	1.22011	8.86569e-22	1.66684e-20
ENSG00000064547	LPAR2	1.2187	5.30507e-09	3.49907e-08
ENSG00000124635	HIST1H2BJ	1.21825	1.66706e-09	1.15657e-08
ENSG00000047617	ANO2	1.21811	1.04287e-06	5.16763e-06
ENSG00000187775	DNAH17	1.2174	2.58997e-35	9.99099e-34
ENSG00000100906	NFKBIA	1.21704	1.00268e-45	5.79607e-44
ENSG00000136048	DRAM1	1.21596	1.03733e-74	1.63316e-72
ENSG00000181026	AEN	1.21401	3.37934e-108	1.0555e-105
ENSG00000064989	CALCRL	1.21323	0.00407934	0.011142
ENSG00000163346	PBXIP1	1.21281	1.50777e-56	1.24247e-54
ENSG00000255367	RP13-726E6.2	1.21144	0.0125907	0.0305346
ENSG00000177138	FAM9B	1.21066	0.000895147	0.0027977
ENSG00000157927	RADIL	1.2079	0.00742723	0.0190501
ENSG00000109193	SULT1E1	1.20697	0.000174108	0.000617622
ENSG00000157601	MX1	1.20357	3.70304e-20	6.24647e-19
ENSG00000211445	GPX3	1.20244	2.94699e-12	2.68811e-11
ENSG00000130733	YIPF2	1.20234	1.57551e-35	6.15117e-34
ENSG00000181418	DDN	1.20181	3.17465e-05	0.000127731
ENSG00000131620	ANO1	1.20166	0.0130985	0.0316236
ENSG00000184985	SORCS2	1.19895	6.61984e-13	6.39367e-12
ENSG00000144802	NFKBIZ	1.19562	6.84773e-39	3.09828e-37
ENSG00000099203	TMED1	1.19268	4.04458e-26	9.99023e-25
ENSG00000136235	GPNMB	1.19253	7.07623e-31	2.2501e-29
ENSG00000089916	GPATCH2L	1.19227	6.91421e-80	1.27518e-77
ENSG00000256664	RP11-611O2.3	1.19044	4.99835e-13	4.87622e-12
ENSG00000167588	GPD1	1.19034	0.00292805	0.00822955
ENSG00000273079	GRIN2B	1.19032	0.0140452	0.033645
ENSG00000162894	FCMR	1.18899	2.65327e-19	4.24984e-18
ENSG00000173175	ADCY5	1.18794	0.0102083	0.0253729
ENSG00000149926	FAM57B	1.18758	0.00214577	0.006201
ENSG00000187583	PLEKHN1	1.18729	8.80395e-09	5.67916e-08
ENSG00000073605	GSDMB	1.18327	2.59941e-06	1.2203e-05
ENSG00000134830	C5AR2	1.18245	9.55734e-15	1.07541e-13
ENSG00000143387	CTSK	1.1824	0.000492331	0.00161977
ENSG00000168685	IL7R	1.18094	2.29866e-70	3.02814e-68
ENSG00000204386	NEU1	1.17988	3.63957e-47	2.21636e-45
ENSG00000215644	GCGR	1.17942	0.00175377	0.00516294
ENSG00000104324	CPQ	1.17755	6.42515e-11	5.15423e-10
ENSG00000166922	SCG5	1.17537	9.2574e-14	9.66412e-13
ENSG00000136286	MYO1G	1.17531	3.31417e-11	2.73369e-10
ENSG00000125551	PLGLB2	1.17453	0.000865603	0.00271412
ENSG00000173281	PPP1R3B	1.17451	5.79927e-16	7.24535e-15
ENSG00000018625	ATP1A2	1.17374	0.00828479	0.0209938
ENSG00000185338	SOCS1	1.17321	0.017281	0.0403675
ENSG00000170458	CD14	1.1729	0.0125242	0.0304115
ENSG00000171766	GATM	1.17232	0.00433718	0.0117715
ENSG00000183248	PRR36	1.17197	0.0134815	0.0324432
ENSG00000258417	RP11-240B13.2	1.17125	0.0131649	0.03176
ENSG00000108622	ICAM2	1.17093	8.83965e-10	6.30961e-09
ENSG00000260103	RP11-10O17.1	1.17087	3.78566e-10	2.80556e-09
ENSG00000132026	RTBDN	1.17065	0.00809552	0.0205762
ENSG00000141933	TPGS1	1.17047	0.00117436	0.00358135
ENSG00000142235	LMTK3	1.17035	0.0026298	0.00746497
ENSG00000013563	DNASE1L1	1.17016	1.75402e-44	9.76054e-43
ENSG00000123338	NCKAP1L	1.16873	0.00420044	0.0114308
ENSG00000170745	KCNS3	1.16819	0.00639626	0.0167045
ENSG00000165905	LARGE2	1.16716	2.87274e-07	1.53379e-06
ENSG00000131095	GFAP	1.16697	0.010945	0.0269965
ENSG00000173727	CMB9-22P13.1	1.1669	1.13552e-13	1.17465e-12
ENSG00000205593	DENND6B	1.16685	3.45623e-07	1.82669e-06
ENSG00000182795	C1orf116	1.16625	2.60784e-09	1.77258e-08
ENSG00000101940	WDR13	1.16571	9.77235e-58	8.60189e-56
ENSG00000151617	EDNRA	1.16523	1.09163e-13	1.13166e-12
ENSG00000163141	BNIPL	1.16465	0.000367693	0.00123938
ENSG00000156711	MAPK13	1.16354	5.53135e-08	3.24984e-07
ENSG00000181450	ZNF678	1.16327	7.84535e-21	1.38491e-19
ENSG00000211892	IGHG4	1.16301	0.0119418	0.0291652
ENSG00000174945	AMZ1	1.163	1.64875e-06	7.96012e-06
ENSG00000119917	IFIT3	1.16187	2.21071e-39	1.01687e-37
ENSG00000181409	AATK	1.16149	0.00158719	0.00472257
ENSG00000204301	NOTCH4	1.16111	0.00338604	0.00938505
ENSG00000125864	BFSP1	1.16004	0.000718497	0.00229145
ENSG00000179820	MYADM	1.15821	7.74415e-63	8.23986e-61
ENSG00000198794	SCAMP5	1.15601	4.44055e-07	2.31346e-06
ENSG00000167646	DNAAF3	1.15179	0.00201385	0.00585119
ENSG00000162777	DENND2D	1.1503	5.19844e-14	5.53431e-13
ENSG00000171346	KRT15	1.14858	7.79749e-08	4.49936e-07
ENSG00000213413	PVRIG	1.14817	0.00131791	0.00398335
ENSG00000078401	EDN1	1.14795	2.8704e-19	4.58246e-18
ENSG00000196872	KIAA1211L	1.14721	0.00921141	0.0231331
ENSG00000137699	TRIM29	1.14708	3.20079e-57	2.75482e-55
ENSG00000132031	MATN3	1.14703	1.13659e-09	8.02872e-09
ENSG00000163806	SPDYA	1.14701	0.00162339	0.00481717
ENSG00000215375	MYL5	1.14551	1.99518e-08	1.23598e-07
ENSG00000176723	ZNF843	1.14407	0.0091422	0.0229771
ENSG00000101198	NKAIN4	1.14293	0.0177438	0.0412595
ENSG00000188505	NCCRP1	1.14265	0.00056058	0.00182601
ENSG00000104237	RP1	1.14209	0.00709795	0.0183074
ENSG00000156804	FBXO32	1.14205	1.29563e-76	2.10839e-74
ENSG00000189221	MAOA	1.1417	3.04207e-08	1.84496e-07
ENSG00000124216	SNAI1	1.14149	5.10587e-16	6.4163e-15
ENSG00000185339	TCN2	1.14111	2.84822e-05	0.000115413
ENSG00000177409	SAMD9L	1.14101	8.96695e-13	8.54552e-12
ENSG00000253910	PCDHGB2	1.14099	0.00124661	0.00378497
ENSG00000183833	MAATS1	1.14034	0.0165607	0.0388677
ENSG00000172602	RND1	1.1399	0.000938308	0.00292128
ENSG00000123095	BHLHE41	1.13976	0.00184808	0.00540524
ENSG00000057294	PKP2	1.13942	4.03277e-20	6.77904e-19
ENSG00000078814	MYH7B	1.13937	0.00227067	0.00652978
ENSG00000131016	AKAP12	1.13744	1.22924e-56	1.02164e-54
ENSG00000149798	CDC42EP2	1.13709	9.69398e-49	6.27839e-47
ENSG00000187642	PERM1	1.137	0.000151255	0.000541814
ENSG00000186847	KRT14	1.13669	5.8323e-24	1.25492e-22
ENSG00000111859	NEDD9	1.13609	1.97686e-48	1.26343e-46
ENSG00000165861	ZFYVE1	1.13599	1.23567e-25	2.93655e-24
ENSG00000173210	ABLIM3	1.13473	1.60048e-50	1.10296e-48
ENSG00000172081	MOB3A	1.13452	3.61151e-30	1.10485e-28
ENSG00000185561	TLCD2	1.13303	2.86627e-14	3.10433e-13
ENSG00000109066	TMEM104	1.13288	1.77674e-42	8.98345e-41
ENSG00000183778	B3GALT5	1.13256	0.00246332	0.00703779
ENSG00000172667	ZMAT3	1.13234	6.81913e-46	3.96554e-44
ENSG00000242299	RP11-234A1.1	1.13101	0.00465272	0.0125365
ENSG00000138623	SEMA7A	1.13008	1.59205e-13	1.62093e-12
ENSG00000264257	KIR3DP1	1.12976	3.97371e-09	2.65073e-08
ENSG00000103381	CPPED1	1.12926	2.58194e-36	1.0504e-34
ENSG00000110031	LPXN	1.12917	1.32889e-05	5.65832e-05
ENSG00000147421	HMBOX1	1.12894	2.16422e-27	5.7967e-26
ENSG00000182687	GALR2	1.12824	0.0136768	0.0328592
ENSG00000275591	XKR5	1.12813	0.00503011	0.0134374
ENSG00000168591	TMUB2	1.12799	1.75137e-50	1.19842e-48
ENSG00000183828	NUDT14	1.12788	2.21051e-09	1.51474e-08
ENSG00000198003	CCDC151	1.12771	0.015023	0.0357133
ENSG00000174125	TLR1	1.12725	0.00293646	0.00824962
ENSG00000115461	IGFBP5	1.12671	8.14509e-51	5.6332e-49
ENSG00000184408	KCND2	1.1265	0.0166959	0.0391423
ENSG00000278277	GU182355.5	1.126	3.95223e-05	0.000156673
ENSG00000109065	NAT9	1.12511	1.14637e-43	6.14944e-42
ENSG00000198053	SIRPA	1.12454	4.30886e-38	1.88781e-36
ENSG00000003989	SLC7A2	1.12302	8.92411e-73	1.28967e-70
ENSG00000182318	ZSCAN22	1.12292	1.53775e-21	2.83066e-20
ENSG00000182472	CAPN12	1.12285	0.00124295	0.00377505
ENSG00000117983	MUC5B	1.12202	0.0163606	0.0384728
ENSG00000122574	WIPF3	1.12105	0.0081246	0.0206419
ENSG00000120211	INSL4	1.12077	7.36423e-05	0.000278423
ENSG00000135318	NT5E	1.12002	2.58521e-33	9.23663e-32
ENSG00000197483	ZNF628	1.11954	6.72029e-08	3.90924e-07
ENSG00000274750	HIST1H3E	1.11845	0.00494142	0.0132316
ENSG00000163359	COL6A3	1.11843	8.69633e-05	0.000324917
ENSG00000125398	SOX9	1.11729	1.4706e-18	2.24591e-17
ENSG00000163328	GPR155	1.11701	1.43234e-12	1.34003e-11
ENSG00000181523	SGSH	1.11565	2.86408e-25	6.67424e-24
ENSG00000205669	ACOT6	1.11478	0.0164169	0.0385911
ENSG00000162461	SLC25A34	1.11407	0.00160008	0.00475748
ENSG00000139192	TAPBPL	1.11264	6.60529e-10	4.78532e-09
ENSG00000115129	TP53I3	1.11247	4.25466e-37	1.79502e-35
ENSG00000060642	PIGV	1.11203	5.02258e-17	6.83982e-16
ENSG00000066230	SLC9A3	1.11011	1.22069e-07	6.85375e-07
ENSG00000088726	TMEM40	1.10976	0.00242418	0.00693622
ENSG00000135452	TSPAN31	1.10918	2.22756e-31	7.37381e-30
ENSG00000131969	ABHD12B	1.10753	2.05266e-23	4.26957e-22
ENSG00000103089	FA2H	1.10617	0.00027953	0.000960278
ENSG00000179085	DPM3	1.10537	1.16724e-10	9.10337e-10
ENSG00000131196	NFATC1	1.10512	1.78121e-06	8.57397e-06
ENSG00000182752	PAPPA	1.1046	5.29418e-89	1.15193e-86
ENSG00000139656	SMIM2	1.10418	0.00564433	0.0148974
ENSG00000142910	TINAGL1	1.10418	8.90476e-59	8.21146e-57
ENSG00000257512	RP11-486A14.1	1.10248	0.0100939	0.0251083
ENSG00000099992	TBC1D10A	1.10089	3.96036e-15	4.60615e-14
ENSG00000175591	P2RY2	1.10087	3.0506e-06	1.417e-05
ENSG00000267419	CTC-559E9.6	1.10001	0.00304902	0.00853117
ENSG00000138639	ARHGAP24	1.09965	0.00471975	0.0127047
ENSG00000221994	ZNF630	1.09794	8.28591e-05	0.000310661
ENSG00000007255	TRAPPC6A	1.09776	0.011537	0.0283054
ENSG00000107738	C10orf54	1.09625	1.4605e-27	3.91724e-26
ENSG00000139292	LGR5	1.09606	5.37623e-11	4.34519e-10
ENSG00000122877	EGR2	1.0946	0.000967288	0.00300581
ENSG00000177614	PGBD5	1.09429	0.00554037	0.014653
ENSG00000005238	FAM214B	1.09295	7.26788e-40	3.35901e-38
ENSG00000205403	CFI	1.0929	0.00285266	0.00803866
ENSG00000182545	RNASE10	1.09273	0.00106408	0.00327805
ENSG00000164265	SCGB3A2	1.08998	2.70464e-18	4.05068e-17
ENSG00000181143	MUC16	1.08962	1.87183e-08	1.16366e-07
ENSG00000173013	CCDC96	1.08913	0.000770769	0.00244521
ENSG00000164056	SPRY1	1.08847	0.00796394	0.0202683
ENSG00000267281	RP11-793H13.10	1.08741	0.000173683	0.000616227
ENSG00000227827	RP11-958N24.2	1.08609	0.00492563	0.0131958
ENSG00000232434	C9orf172	1.08595	2.32261e-08	1.4274e-07
ENSG00000204920	ZNF155	1.08573	3.25481e-15	3.81534e-14
ENSG00000283511	RP11-456N14.6	1.08562	0.00319004	0.00888341
ENSG00000267323	SLC25A1P5	1.08406	2.99583e-06	1.39424e-05
ENSG00000146232	NFKBIE	1.08361	3.3146e-11	2.73369e-10
ENSG00000196152	ZNF79	1.08176	2.66276e-17	3.69903e-16
ENSG00000143322	ABL2	1.08137	3.37099e-79	5.98892e-77
ENSG00000162458	FBLIM1	1.08042	9.08585e-29	2.57233e-27
ENSG00000140450	ARRDC4	1.07864	7.31862e-22	1.3881e-20
ENSG00000162129	CLPB	1.07855	3.44886e-50	2.32708e-48
ENSG00000167378	IRGQ	1.07817	2.46895e-31	8.14501e-30
ENSG00000115594	IL1R1	1.07749	3.68452e-23	7.51853e-22
ENSG00000086730	LAT2	1.07747	3.84275e-06	1.76548e-05
ENSG00000197808	ZNF461	1.07506	0.000963079	0.00299503
ENSG00000250138	RP11-848G14.5	1.07446	0.0175154	0.0408412
ENSG00000139629	GALNT6	1.07433	1.29968e-09	9.10904e-09
ENSG00000175984	DENND2C	1.07247	3.49673e-08	2.10948e-07
ENSG00000157423	HYDIN	1.07246	0.0193909	0.0445545
ENSG00000145945	FAM50B	1.07066	1.00635e-23	2.14153e-22
ENSG00000205045	SLFN12L	1.07048	0.00126438	0.00383472
ENSG00000184281	TSSC4	1.0702	4.45927e-18	6.60197e-17
ENSG00000047936	ROS1	1.06629	6.13069e-14	6.49812e-13
ENSG00000180209	MYLPF	1.0661	0.013154	0.0317417
ENSG00000128881	TTBK2	1.06549	9.41311e-32	3.19238e-30
ENSG00000111644	ACRBP	1.06453	0.017245	0.0402912
ENSG00000163795	ZNF513	1.06449	3.19453e-10	2.38206e-09
ENSG00000066427	ATXN3	1.06389	4.05095e-47	2.45914e-45
ENSG00000145901	TNIP1	1.06273	1.19213e-58	1.09411e-56
ENSG00000116717	GADD45A	1.06236	3.67805e-39	1.68382e-37
ENSG00000132530	XAF1	1.06206	8.26436e-05	0.000309974
ENSG00000126005	MMP24-AS1	1.06179	2.00069e-23	4.16595e-22
ENSG00000126259	KIRREL2	1.06101	0.018541	0.0428815
ENSG00000148671	ADIRF	1.06097	2.34008e-07	1.26509e-06
ENSG00000144810	COL8A1	1.06024	1.21424e-51	8.58169e-50
ENSG00000229859	PGA3	1.05984	0.0144527	0.0345017
ENSG00000280273	AF131216.1	1.0585	0.0191998	0.0441624
ENSG00000091592	NLRP1	1.05705	8.78073e-31	2.76936e-29
ENSG00000278384	AL354822.1	1.05698	9.62011e-07	4.7989e-06
ENSG00000057657	PRDM1	1.05573	1.45161e-08	9.15647e-08
ENSG00000196083	IL1RAP	1.05563	7.34443e-38	3.17466e-36
ENSG00000166839	ANKDD1A	1.05527	2.20329e-06	1.04626e-05
ENSG00000221972	C3orf36	1.05524	0.013469	0.0324211
ENSG00000182326	C1S	1.05477	3.13455e-36	1.26989e-34
ENSG00000197646	PDCD1LG2	1.05465	0.00857053	0.0216641
ENSG00000231738	TSPAN19	1.05453	0.0196493	0.045052
ENSG00000143507	DUSP10	1.05391	1.052e-11	9.16833e-11
ENSG00000100036	SLC35E4	1.0519	2.1111e-11	1.77823e-10
ENSG00000198182	ZNF607	1.05132	1.03356e-17	1.4881e-16
ENSG00000150967	ABCB9	1.05057	1.76325e-11	1.49826e-10
ENSG00000184925	LCN12	1.05023	0.00455388	0.0122924
ENSG00000117480	FAAH	1.04967	0.0126866	0.0307402
ENSG00000177380	PPFIA3	1.04939	1.991e-10	1.51555e-09
ENSG00000185296	CTD-2139B15.1	1.04837	0.0195946	0.0449425
ENSG00000232022	FAAHP1	1.04818	0.0189083	0.0435826
ENSG00000171680	PLEKHG5	1.04661	2.22552e-18	3.35648e-17
ENSG00000177595	PIDD1	1.0466	7.69627e-11	6.10562e-10
ENSG00000230071	RPL4P6	1.04612	0.00707662	0.0182597
ENSG00000102996	MMP15	1.04582	2.60398e-17	3.62257e-16
ENSG00000145147	SLIT2	1.04515	8.40952e-09	5.43378e-08
ENSG00000006638	TBXA2R	1.0448	3.10963e-15	3.65179e-14
ENSG00000130940	CASZ1	1.04354	5.95843e-15	6.81944e-14
ENSG00000164849	GPR146	1.04285	0.00614683	0.0161161
ENSG00000145022	TCTA	1.04262	3.01891e-28	8.36354e-27
ENSG00000230510	PPP5D1	1.04223	0.00381633	0.0104872
ENSG00000131459	GFPT2	1.0419	3.21794e-36	1.30095e-34
ENSG00000157227	MMP14	1.04052	2.02661e-14	2.216e-13
ENSG00000101194	SLC17A9	1.04006	2.02552e-16	2.62194e-15
ENSG00000206077	ZDHHC11B	1.03874	0.000899413	0.00280928
ENSG00000145020	AMT	1.03785	0.000446705	0.00148048
ENSG00000147119	CHST7	1.03706	0.00154076	0.0046009
ENSG00000125931	CITED1	1.03664	0.0198988	0.0455439
ENSG00000188033	ZNF490	1.03471	1.98673e-05	8.22951e-05
ENSG00000260238	PMF1-BGLAP	1.03436	6.74483e-07	3.4363e-06
ENSG00000105355	PLIN3	1.03345	5.05343e-45	2.86139e-43
ENSG00000123240	OPTN	1.03319	2.91902e-62	3.03907e-60
ENSG00000064489	BORCS8-MEF2B	1.03255	0.00119363	0.00363608
ENSG00000005102	MEOX1	1.03223	1.11227e-17	1.59549e-16
ENSG00000197019	SERTAD1	1.03073	3.78342e-09	2.53252e-08
ENSG00000171872	KLF17	1.02952	0.0019273	0.00561827
ENSG00000182261	NLRP10	1.02914	0.0195686	0.0448937
ENSG00000103034	NDRG4	1.02677	8.78678e-11	6.92818e-10
ENSG00000175213	ZNF408	1.02671	3.01718e-21	5.45544e-20
ENSG00000135519	KCNH3	1.02582	0.01594	0.0375932
ENSG00000099330	OCEL1	1.02403	7.83015e-10	5.63474e-09
ENSG00000243902	ELFN2	1.02383	1.88296e-24	4.19121e-23
ENSG00000067221	STOML1	1.02271	1.70326e-14	1.87407e-13
ENSG00000152137	HSPB8	1.02199	2.47487e-54	1.93249e-52
ENSG00000114993	RTKN	1.02194	2.88236e-08	1.75525e-07
ENSG00000133107	TRPC4	1.01908	9.49099e-11	7.4561e-10
ENSG00000125657	TNFSF9	1.01714	4.32139e-30	1.31166e-28
ENSG00000122986	HVCN1	1.01666	0.0127569	0.0308989
ENSG00000120215	MLANA	1.01573	0.00109519	0.00336266
ENSG00000196544	BORCS6	1.01534	4.67473e-11	3.79564e-10
ENSG00000088992	TESC	1.0136	9.22586e-14	9.6364e-13
ENSG00000105419	MEIS3	1.01342	3.12808e-15	3.669e-14
ENSG00000204642	HLA-F	1.01296	1.79467e-16	2.33875e-15
ENSG00000141376	BCAS3	1.01186	4.10689e-20	6.89765e-19
ENSG00000123610	TNFAIP6	1.01089	0.000886936	0.00277517
ENSG00000080189	SLC35C2	1.01041	2.5353e-53	1.88831e-51
ENSG00000117425	PTCH2	1.01004	0.00631205	0.0165046
ENSG00000105404	RABAC1	1.00992	1.12428e-19	1.83728e-18
ENSG00000167232	ZNF91	1.00973	3.39748e-17	4.68271e-16
ENSG00000115267	IFIH1	1.00944	1.18572e-09	8.35572e-09
ENSG00000135048	TMEM2	1.00848	5.61904e-59	5.20635e-57
ENSG00000100246	DNAL4	1.00846	3.5489e-08	2.13962e-07
ENSG00000197324	LRP10	1.00784	5.44131e-58	4.90098e-56
ENSG00000261582	RP4-614O4.11	1.00765	0.0176324	0.0410497
ENSG00000101298	SNPH	1.00702	0.000335327	0.00113843
ENSG00000158825	CDA	1.007	1.18496e-51	8.40543e-50
ENSG00000244509	APOBEC3C	1.00655	6.71747e-07	3.42326e-06
ENSG00000100592	DAAM1	1.00632	1.51061e-35	5.90971e-34
ENSG00000108700	CCL8	1.00611	0.0206214	0.0469363
ENSG00000146950	SHROOM2	1.00601	0.00412132	0.0112407
ENSG00000109846	CRYAB	1.00531	4.2647e-29	1.23447e-27
ENSG00000189143	CLDN4	1.00437	1.32978e-25	3.15579e-24
ENSG00000181826	RELL1	1.00436	2.18559e-05	8.98597e-05
ENSG00000152784	PRDM8	1.00292	0.0165187	0.0387833
ENSG00000126878	AIF1L	1.00275	3.75709e-19	5.96851e-18
ENSG00000186472	PCLO	1.00272	5.01368e-17	6.83251e-16
ENSG00000044090	CUL7	1.00222	6.31124e-40	2.92386e-38
ENSG00000204767	FAM196B	1.00166	1.96093e-16	2.54344e-15
ENSG00000283189	RP11-949J7.8	1.00164	8.39187e-10	6.01661e-09
ENSG00000089060	SLC8B1	1.00137	1.39476e-26	3.54456e-25
ENSG00000173662	TAS1R1	1.00125	0.019007	0.0437814
ENSG00000136630	HLX	1.00101	2.8145e-05	0.000114166
ENSG00000158480	SPATA2	0.999317	3.90762e-24	8.53112e-23
ENSG00000227766	HCG4P5	0.997961	0.0186376	0.0430689
ENSG00000103642	LACTB	0.9978	1.04138e-33	3.79067e-32
ENSG00000160284	SPATC1L	0.99618	1.16707e-05	5.00785e-05
ENSG00000186480	INSIG1	0.995714	1.52333e-60	1.44925e-58
ENSG00000158023	WDR66	0.995295	6.39283e-12	5.67356e-11
ENSG00000155366	RHOC	0.992123	1.15013e-64	1.2727e-62
ENSG00000126785	RHOJ	0.992119	0.0217932	0.0492962
ENSG00000013364	MVP	0.991527	1.12412e-52	8.27704e-51
ENSG00000253731	PCDHGA6	0.99116	0.000901569	0.0028155
ENSG00000197948	FCHSD1	0.991088	6.5723e-24	1.40788e-22
ENSG00000187984	ANKRD19P	0.990612	0.0179146	0.0416068
ENSG00000167578	RAB4B	0.989961	1.31182e-08	8.3045e-08
ENSG00000128274	A4GALT	0.989819	1.41804e-26	3.59899e-25
ENSG00000119681	LTBP2	0.988771	3.73994e-52	2.68237e-50
ENSG00000124067	SLC12A4	0.987858	1.04113e-44	5.86089e-43
ENSG00000167637	ZNF283	0.987455	5.62577e-20	9.36741e-19
ENSG00000012822	CALCOCO1	0.987004	1.39433e-43	7.4179e-42
ENSG00000171403	KRT9	0.985528	2.10161e-05	8.66462e-05
ENSG00000253846	PCDHGA10	0.985277	0.000532711	0.00174246
ENSG00000126368	NR1D1	0.985157	1.77796e-18	2.69829e-17
ENSG00000109667	SLC2A9	0.985144	0.00451206	0.0121863
ENSG00000105371	ICAM4	0.984754	0.0220821	0.0498682
ENSG00000167619	TMEM145	0.984615	0.000407013	0.0013594
ENSG00000123384	LRP1	0.983733	1.0925e-44	6.1145e-43
ENSG00000117215	PLA2G2D	0.982637	0.0200826	0.0459095
ENSG00000183087	GAS6	0.982408	4.84316e-22	9.31358e-21
ENSG00000168811	IL12A	0.982181	0.00511105	0.0136367
ENSG00000145040	UCN2	0.981469	5.13571e-21	9.1409e-20
ENSG00000163293	NIPAL1	0.980603	0.00182507	0.005346
ENSG00000175544	CABP4	0.980443	6.48075e-08	3.78125e-07
ENSG00000130202	NECTIN2	0.980105	7.78821e-32	2.65526e-30
ENSG00000196335	STK31	0.979364	0.00312456	0.00871735
ENSG00000187244	BCAM	0.979223	1.15383e-23	2.44999e-22
ENSG00000140323	DISP2	0.978638	2.37336e-08	1.45674e-07
ENSG00000170175	CHRNB1	0.978213	1.02209e-08	6.54524e-08
ENSG00000187556	NANOS3	0.976612	0.0203324	0.0463875
ENSG00000164951	PDP1	0.976046	7.57869e-30	2.2789e-28
ENSG00000179242	CDH4	0.975608	0.00809502	0.0205762
ENSG00000196110	ZNF699	0.975491	1.34544e-06	6.56613e-06
ENSG00000265190	ANXA8	0.975134	1.17436e-54	9.28224e-53
ENSG00000154237	LRRK1	0.975056	1.0823e-67	1.34351e-65
ENSG00000228672	PROB1	0.974833	3.3065e-10	2.46176e-09
ENSG00000111348	ARHGDIB	0.9723	4.96633e-09	3.28347e-08
ENSG00000198223	CSF2RA	0.971905	5.88984e-15	6.75692e-14
ENSG00000127533	F2RL3	0.971766	0.00211589	0.00612195
ENSG00000073670	ADAM11	0.971119	0.000502329	0.00164986
ENSG00000261587	TMEM249	0.969985	0.0130241	0.0314715
ENSG00000142408	CACNG8	0.969604	0.00022885	0.000796349
ENSG00000184319	RPL23AP82	0.969202	7.83202e-26	1.89111e-24
ENSG00000184924	PTRHD1	0.967751	5.37445e-15	6.18397e-14
ENSG00000245680	ZNF585B	0.96706	1.07081e-15	1.30417e-14
ENSG00000006283	CACNA1G	0.96702	9.08838e-06	3.96121e-05
ENSG00000181126	HLA-V	0.966797	0.000713127	0.00227545
ENSG00000131979	GCH1	0.966615	8.09499e-08	4.65853e-07
ENSG00000244270	RPL32P29	0.965798	0.0118261	0.0289085
ENSG00000235944	ZNF815P	0.965738	5.0337e-05	0.000195974
ENSG00000164938	TP53INP1	0.965449	7.4897e-13	7.20149e-12
ENSG00000177000	MTHFR	0.964882	6.24322e-26	1.52075e-24
ENSG00000150347	ARID5B	0.964662	9.16513e-30	2.73471e-28
ENSG00000024862	CCDC28A	0.964545	2.28966e-14	2.49799e-13
ENSG00000124374	PAIP2B	0.964231	0.000693864	0.00222131
ENSG00000169403	PTAFR	0.963879	0.013457	0.0323962
ENSG00000255526	NEDD8-MDP1	0.963441	0.0198544	0.0454685
ENSG00000140950	TLDC1	0.95893	9.1797e-46	5.3223e-44
ENSG00000073910	FRY	0.956853	6.9785e-12	6.17072e-11
ENSG00000172828	CES3	0.95562	0.000451306	0.00149471
ENSG00000147697	GSDMC	0.955374	0.00368123	0.0101361
ENSG00000163347	CLDN1	0.954683	2.97592e-48	1.88329e-46
ENSG00000078114	NEBL	0.954041	1.02641e-11	8.95734e-11
ENSG00000164010	ERMAP	0.953105	5.97317e-16	7.45299e-15
ENSG00000160360	GPSM1	0.951897	9.30377e-16	1.13914e-14
ENSG00000115194	SLC30A3	0.951838	0.00533675	0.014159
ENSG00000174327	SLC16A13	0.951673	0.0028696	0.00808053
ENSG00000184792	OSBP2	0.951056	2.16115e-71	2.94723e-69
ENSG00000164331	ANKRA2	0.950506	7.93224e-10	5.70396e-09
ENSG00000163817	SLC6A20	0.950455	0.00266043	0.00754197
ENSG00000143590	EFNA3	0.949924	2.4527e-05	0.00010014
ENSG00000105427	CNFN	0.949748	0.0117508	0.0287542
ENSG00000183876	ARSI	0.949619	1.8722e-05	7.80018e-05
ENSG00000063180	CA11	0.948776	7.60348e-07	3.84342e-06
ENSG00000128713	HOXD11	0.948643	0.0189266	0.0436169
ENSG00000221995	TIAF1	0.947873	5.74749e-05	0.000221537
ENSG00000172421	EFCAB3	0.947499	0.00518942	0.0138156
ENSG00000158792	SPATA2L	0.946984	8.90405e-05	0.000331782
ENSG00000178209	PLEC	0.946758	3.82874e-07	2.01149e-06
ENSG00000049089	COL9A2	0.946605	0.0165789	0.0389004
ENSG00000125731	SH2D3A	0.946436	7.92313e-14	8.32961e-13
ENSG00000213221	DNLZ	0.942701	1.52711e-07	8.4541e-07
ENSG00000179750	APOBEC3B	0.942004	6.15123e-10	4.46639e-09
ENSG00000100299	ARSA	0.94178	2.85673e-13	2.83404e-12
ENSG00000142227	EMP3	0.941613	9.03666e-55	7.17192e-53
ENSG00000119922	IFIT2	0.940863	9.541e-37	3.94789e-35
ENSG00000153237	CCDC148	0.940563	0.0186038	0.043001
ENSG00000174939	ASPHD1	0.940095	6.79249e-15	7.75113e-14
ENSG00000173801	JUP	0.939187	4.01264e-61	3.94441e-59
ENSG00000137825	ITPKA	0.938012	0.000927243	0.00289114
ENSG00000135480	KRT7	0.937985	1.4455e-66	1.69649e-64
ENSG00000176531	PHLDB3	0.937939	1.17739e-07	6.62216e-07
ENSG00000168528	SERINC2	0.937773	3.4173e-22	6.6176e-21
ENSG00000173237	C11orf86	0.937024	5.66883e-05	0.000218766
ENSG00000114455	HHLA2	0.936998	0.00281033	0.00792862
ENSG00000162520	SYNC	0.936618	4.79619e-20	8.02057e-19
ENSG00000164122	ASB5	0.935669	0.0211968	0.0481272
ENSG00000137819	PAQR5	0.935168	2.73071e-13	2.71459e-12
ENSG00000196220	SRGAP3	0.933674	4.97627e-05	0.000193972
ENSG00000171606	ZNF274	0.933558	2.40778e-30	7.44835e-29
ENSG00000178093	TSSK6	0.933083	0.00902125	0.0227144
ENSG00000172901	LVRN	0.932616	0.00980093	0.0244613
ENSG00000165312	OTUD1	0.932495	9.3448e-13	8.88812e-12
ENSG00000169891	REPS2	0.93219	6.09319e-12	5.42255e-11
ENSG00000197150	ABCB8	0.931047	4.94662e-30	1.49908e-28
ENSG00000250517	LDHAL6CP	0.930071	0.0197547	0.0452712
ENSG00000123977	DAW1	0.929663	0.0121956	0.0297103
ENSG00000267796	LIN37	0.929546	1.03874e-09	7.36015e-09
ENSG00000175602	CCDC85B	0.929212	3.89579e-09	2.60324e-08
ENSG00000185565	LSAMP	0.929097	0.0117422	0.0287395
ENSG00000134245	WNT2B	0.928965	2.73974e-05	0.00011132
ENSG00000185885	IFITM1	0.928764	8.43723e-15	9.54921e-14
ENSG00000107290	SETX	0.92863	1.17454e-77	2.03081e-75
ENSG00000132692	BCAN	0.928097	1.65447e-06	7.98574e-06
ENSG00000248672	LY75-CD302	0.928052	0.0123321	0.0300089
ENSG00000259726	CSPG4P11	0.928018	0.0221235	0.0499558
ENSG00000171223	JUNB	0.928012	1.48426e-18	2.26498e-17
ENSG00000167074	TEF	0.9277	1.27416e-14	1.41805e-13
ENSG00000180481	GLIPR1L2	0.925533	0.0136244	0.0327504
ENSG00000144843	ADPRH	0.924554	0.00116342	0.00355246
ENSG00000150722	PPP1R1C	0.924459	0.00449096	0.0121378
ENSG00000163898	LIPH	0.924438	3.77179e-05	0.000150012
ENSG00000163517	HDAC11	0.924314	3.36773e-05	0.000135079
ENSG00000169193	CCDC126	0.924023	1.68826e-05	7.0841e-05
ENSG00000198520	C1orf228	0.923547	0.00963905	0.0241132
ENSG00000188290	HES4	0.922749	0.000300722	0.00102961
ENSG00000183831	ANKRD45	0.922335	0.0095431	0.0238855
ENSG00000052841	TTC17	0.92188	1.98401e-50	1.34808e-48
ENSG00000101443	WFDC2	0.92134	0.0203846	0.0464957
ENSG00000260266	CTD-2311M21.2	0.921055	4.15082e-05	0.000163842
ENSG00000184185	KCNJ12	0.920957	3.88772e-19	6.16087e-18
ENSG00000131746	TNS4	0.920582	1.17193e-64	1.28945e-62
ENSG00000027869	SH2D2A	0.920088	0.000349998	0.00118367
ENSG00000008083	JARID2	0.919242	2.82983e-31	9.28809e-30
ENSG00000133110	POSTN	0.919105	0.000136441	0.000492302
ENSG00000020577	SAMD4A	0.917391	5.76719e-27	1.51535e-25
ENSG00000170442	KRT86	0.917278	2.05174e-05	8.47887e-05
ENSG00000113742	CPEB4	0.91708	1.09385e-48	7.06082e-47
ENSG00000204428	LY6G5C	0.917051	0.00403692	0.0110417
ENSG00000118997	DNAH7	0.916469	0.0008609	0.00270112
ENSG00000225663	MCRIP1	0.916015	1.73032e-10	1.32441e-09
ENSG00000068831	RASGRP2	0.915515	0.0160615	0.0378589
ENSG00000257800	FNBP1P1	0.914569	0.00229998	0.00660819
ENSG00000185278	ZBTB37	0.914067	4.18264e-17	5.72821e-16
ENSG00000170876	TMEM43	0.913943	5.32251e-81	1.01049e-78
ENSG00000010319	SEMA3G	0.913136	0.00952346	0.0238425
ENSG00000134827	TCN1	0.912383	0.0183893	0.042561
ENSG00000130164	LDLR	0.912269	2.7332e-53	2.02791e-51
ENSG00000165171	WBSCR27	0.912039	0.000108128	0.000397552
ENSG00000257315	ZBED6	0.911786	2.05945e-20	3.53557e-19
ENSG00000197261	C6orf141	0.910992	1.71586e-10	1.31491e-09
ENSG00000060656	PTPRU	0.910558	9.22358e-16	1.13047e-14
ENSG00000198074	AKR1B10	0.910439	0.000209576	0.000734958
ENSG00000136002	ARHGEF4	0.908422	8.22513e-28	2.23707e-26
ENSG00000197872	FAM49A	0.908363	0.0169897	0.0397782
ENSG00000144824	PHLDB2	0.907903	4.58194e-61	4.48127e-59
ENSG00000165474	GJB2	0.907787	0.0204029	0.0465318
ENSG00000164855	TMEM184A	0.907267	1.46212e-19	2.37533e-18
ENSG00000126561	STAT5A	0.90699	1.81482e-16	2.36341e-15
ENSG00000165915	SLC39A13	0.906909	4.09185e-38	1.79679e-36
ENSG00000197774	EME2	0.904015	1.06588e-11	9.28508e-11
ENSG00000132016	C19orf57	0.903731	0.000489328	0.00161044
ENSG00000012171	SEMA3B	0.903497	2.28764e-57	1.98655e-55
ENSG00000011638	TMEM159	0.903491	4.22521e-12	3.8021e-11
ENSG00000117525	F3	0.903406	7.23636e-61	7.04181e-59
ENSG00000282034	RP11-2C24.9	0.90336	2.30231e-23	4.76327e-22
ENSG00000149541	B3GAT3	0.902344	3.23338e-25	7.48975e-24
ENSG00000198855	FICD	0.900523	4.54366e-09	3.01432e-08
ENSG00000143119	CD53	0.900237	0.00814903	0.0206932
ENSG00000167702	KIFC2	0.89934	2.27412e-12	2.09209e-11
ENSG00000178150	ZNF114	0.897884	0.00294565	0.00827303
ENSG00000105223	PLD3	0.897863	5.92245e-48	3.72365e-46
ENSG00000174791	RIN1	0.897028	9.35583e-28	2.53748e-26
ENSG00000139178	C1RL	0.895967	1.93513e-16	2.51165e-15
ENSG00000165434	PGM2L1	0.895837	1.05669e-17	1.51801e-16
ENSG00000243646	IL10RB	0.894877	3.95307e-24	8.61243e-23
ENSG00000265972	TXNIP	0.893688	3.12042e-33	1.11079e-31
ENSG00000182584	ACTL10	0.892726	0.0149913	0.0356554
ENSG00000158406	HIST1H4H	0.892146	7.28616e-05	0.000275633
ENSG00000187372	PCDHB13	0.891965	2.35443e-06	1.11421e-05
ENSG00000198715	GLMP	0.891742	7.34907e-34	2.71076e-32
ENSG00000102057	KCND1	0.890999	4.55059e-09	3.01788e-08
ENSG00000048740	CELF2	0.889719	4.3874e-08	2.61583e-07
ENSG00000134343	ANO3	0.888991	0.0118178	0.0288954
ENSG00000138100	TRIM54	0.888476	0.00240315	0.00688113
ENSG00000131408	NR1H2	0.8877	1.03331e-27	2.78692e-26
ENSG00000270672	MTRNR2L6	0.887697	1.39833e-63	1.52127e-61
ENSG00000112763	BTN2A1	0.887596	8.37823e-32	2.85139e-30
ENSG00000118898	PPL	0.887572	3.14454e-26	7.81696e-25
ENSG00000213977	TAX1BP3	0.887448	2.66246e-34	9.99195e-33
ENSG00000127585	FBXL16	0.886792	7.97419e-10	5.732e-09
ENSG00000166923	GREM1	0.886672	1.7121e-61	1.70902e-59
ENSG00000187037	GPR141	0.886538	0.0218036	0.0493141
ENSG00000181284	TMEM102	0.886113	4.2432e-07	2.219e-06
ENSG00000077238	IL4R	0.885564	4.7537e-17	6.48277e-16
ENSG00000172780	RAB43	0.885235	0.00145281	0.0043591
ENSG00000050405	LIMA1	0.88494	9.58142e-58	8.47234e-56
ENSG00000214456	PLIN5	0.884702	0.0105321	0.0261045
ENSG00000239282	GATSL3	0.884409	0.0121887	0.0297011
ENSG00000151164	RAD9B	0.884096	0.00145054	0.00435433
ENSG00000196689	TRPV1	0.884091	2.35391e-06	1.11421e-05
ENSG00000196357	ZNF565	0.882915	0.000114703	0.000419256
ENSG00000144589	STK11IP	0.882196	1.17507e-27	3.16485e-26
ENSG00000205809	KLRC2	0.881181	3.86328e-06	1.77364e-05
ENSG00000185133	INPP5J	0.881053	1.24248e-06	6.09438e-06
ENSG00000184517	ZFP1	0.880978	8.62679e-15	9.75235e-14
ENSG00000127561	SYNGR3	0.880978	0.000149903	0.00053737
ENSG00000166145	SPINT1	0.880909	0.000211893	0.000742413
ENSG00000137098	SPAG8	0.880904	0.00574048	0.0151182
ENSG00000139344	AMDHD1	0.880688	0.000584786	0.00190038
ENSG00000073008	PVR	0.879941	9.10025e-43	4.68687e-41
ENSG00000151065	DCP1B	0.879913	5.13997e-13	5.00934e-12
ENSG00000278763	FAM27B	0.879895	1.04445e-05	4.51164e-05
ENSG00000163794	UCN	0.879437	0.0211967	0.0481272
ENSG00000122678	POLM	0.878862	1.4478e-15	1.74574e-14
ENSG00000011677	GABRA3	0.878712	3.11609e-15	3.65716e-14
ENSG00000160746	ANO10	0.877932	1.06583e-41	5.15997e-40
ENSG00000049759	NEDD4L	0.877583	4.03427e-44	2.22574e-42
ENSG00000141738	GRB7	0.876549	1.44873e-05	6.14289e-05
ENSG00000256683	ZNF350	0.876023	5.45464e-10	3.98e-09
ENSG00000130590	SAMD10	0.875634	2.44433e-09	1.66495e-08
ENSG00000162526	TSSK3	0.875174	0.000114261	0.000417799
ENSG00000261052	SULT1A3	0.874945	8.16518e-08	4.69613e-07
ENSG00000214514	KRT42P	0.874429	0.00744787	0.0191005
ENSG00000091844	RGS17	0.874415	0.0121856	0.0296973
ENSG00000166925	TSC22D4	0.87409	5.84684e-24	1.25665e-22
ENSG00000179094	PER1	0.873901	7.31035e-29	2.08798e-27
ENSG00000155034	FBXL18	0.873146	7.11435e-15	8.09932e-14
ENSG00000049249	TNFRSF9	0.872355	2.03436e-05	8.41063e-05
ENSG00000114270	COL7A1	0.872163	1.89658e-07	1.03778e-06
ENSG00000136161	RCBTB2	0.871645	2.28933e-06	1.08493e-05
ENSG00000149573	MPZL2	0.870811	0.00571216	0.0150518
ENSG00000169908	TM4SF1	0.870398	7.4387e-34	2.7386e-32
ENSG00000158125	XDH	0.869808	0.0176431	0.0410698
ENSG00000182796	TMEM198B	0.868506	1.83247e-09	1.26464e-08
ENSG00000196998	WDR45	0.868428	3.2659e-43	1.71393e-41
ENSG00000106367	AP1S1	0.868426	2.24614e-30	6.97059e-29
ENSG00000105825	TFPI2	0.8683	2.58044e-18	3.87968e-17
ENSG00000047634	SCML1	0.867838	6.36771e-28	1.73677e-26
ENSG00000100345	MYH9	0.867201	1.48775e-11	1.27932e-10
ENSG00000139304	PTPRQ	0.867079	0.000474945	0.0015663
ENSG00000077454	LRCH4	0.866653	1.77727e-18	2.69829e-17
ENSG00000120137	PANK3	0.866395	6.92406e-41	3.27035e-39
ENSG00000204262	COL5A2	0.866322	3.94348e-07	2.06785e-06
ENSG00000142627	EPHA2	0.866317	1.08572e-47	6.73877e-46
ENSG00000158859	ADAMTS4	0.865842	0.00133694	0.00403581
ENSG00000186026	ZNF284	0.865447	1.6993e-07	9.35653e-07
ENSG00000112149	CD83	0.865357	2.64395e-21	4.80752e-20
ENSG00000172725	CORO1B	0.864203	4.66202e-24	1.00984e-22
ENSG00000198093	ZNF649	0.863922	0.0163691	0.038488
ENSG00000188681	TEKT4P2	0.863015	5.28204e-05	0.000204942
ENSG00000155066	PROM2	0.862774	0.000679908	0.00218059
ENSG00000135074	ADAM19	0.862116	3.36878e-29	9.80999e-28
ENSG00000157800	SLC37A3	0.86152	3.15711e-25	7.33064e-24
ENSG00000083817	ZNF416	0.859873	2.43358e-08	1.49323e-07
ENSG00000166750	SLFN5	0.859553	6.64924e-37	2.78105e-35
ENSG00000064692	SNCAIP	0.859435	0.00153377	0.00458143
ENSG00000084453	SLCO1A2	0.859408	0.00686521	0.0177972
ENSG00000167105	TMEM92	0.858963	4.91002e-05	0.000191506
ENSG00000107611	CUBN	0.858962	0.019602	0.0449542
ENSG00000232196	MTRNR2L4	0.858636	1.18748e-22	2.36094e-21
ENSG00000173928	SWSAP1	0.857362	0.000262984	0.00090698
ENSG00000197971	MBP	0.85652	4.30077e-24	9.33682e-23
ENSG00000218891	ZNF579	0.855423	1.52973e-09	1.06635e-08
ENSG00000175592	FOSL1	0.855311	3.2534e-33	1.156e-31
ENSG00000196890	HIST3H2BB	0.855212	0.0102998	0.0255777
ENSG00000077935	SMC1B	0.854849	0.01256	0.0304693
ENSG00000123685	BATF3	0.854072	6.12726e-07	3.1332e-06
ENSG00000132359	RAP1GAP2	0.853929	3.83257e-46	2.24223e-44
ENSG00000183186	C2CD4C	0.85275	0.0192493	0.0442712
ENSG00000121417	ZNF211	0.85273	1.92294e-12	1.77831e-11
ENSG00000132824	SERINC3	0.852555	2.57237e-68	3.2138e-66
ENSG00000100097	LGALS1	0.852461	1.68985e-33	6.08252e-32
ENSG00000184009	ACTG1	0.852267	4.30643e-67	5.21212e-65
ENSG00000090615	GOLGA3	0.852045	1.27398e-23	2.6933e-22
ENSG00000010278	CD9	0.851936	2.53377e-50	1.71561e-48
ENSG00000176046	NUPR1	0.851793	4.15095e-25	9.52407e-24
ENSG00000162729	IGSF8	0.851325	2.28281e-13	2.28576e-12
ENSG00000229349	ACTG1P9	0.851228	1.9858e-06	9.50917e-06
ENSG00000112183	RBM24	0.849811	0.00173557	0.00511557
ENSG00000167653	PSCA	0.849559	8.68649e-06	3.7935e-05
ENSG00000030582	GRN	0.849331	2.24858e-58	2.05395e-56
ENSG00000182372	CLN8	0.848338	5.81142e-17	7.85881e-16
ENSG00000178585	CTNNBIP1	0.848152	3.47528e-07	1.83576e-06
ENSG00000170382	LRRN2	0.847918	0.000168976	0.00060096
ENSG00000184381	PLA2G6	0.846605	2.00988e-06	9.61735e-06
ENSG00000126803	HSPA2	0.845871	1.54911e-05	6.5456e-05
ENSG00000164342	TLR3	0.845461	9.30692e-05	0.000345795
ENSG00000160781	PAQR6	0.844669	0.00641819	0.0167527
ENSG00000139278	GLIPR1	0.844514	3.22717e-43	1.69821e-41
ENSG00000212864	RNF208	0.844176	0.000131994	0.000477322
ENSG00000068079	IFI35	0.844037	1.59104e-10	1.22361e-09
ENSG00000067082	KLF6	0.844001	1.97354e-52	1.44218e-50
ENSG00000118473	SGIP1	0.843886	0.00313002	0.00873005
ENSG00000104881	PPP1R13L	0.843774	8.70077e-31	2.74862e-29
ENSG00000162645	GBP2	0.842144	2.68368e-11	2.23333e-10
ENSG00000143630	HCN3	0.842079	8.88478e-08	5.08283e-07
ENSG00000119801	YPEL5	0.841887	1.91582e-10	1.46178e-09
ENSG00000156265	MAP3K7CL	0.841818	0.000463558	0.00153188
ENSG00000175294	CATSPER1	0.841806	0.00265003	0.0075191
ENSG00000091073	DTX2	0.841638	3.129e-12	2.84742e-11
ENSG00000166405	RIC3	0.84119	0.00339821	0.00941571
ENSG00000135127	BICDL1	0.841134	0.000395454	0.00132468
ENSG00000133121	STARD13	0.841088	1.21572e-15	1.47416e-14
ENSG00000223508	RPL23AP53	0.840595	0.000700753	0.00224082
ENSG00000172548	NIPAL4	0.839704	1.79199e-08	1.11654e-07
ENSG00000166128	RAB8B	0.839519	5.79456e-18	8.49445e-17
ENSG00000130528	HRC	0.838839	0.0205831	0.0468656
ENSG00000159403	C1R	0.837469	2.72979e-20	4.65748e-19
ENSG00000205744	DENND1C	0.837405	0.0184183	0.0426181
ENSG00000139926	FRMD6	0.836935	1.3167e-35	5.16152e-34
ENSG00000136044	APPL2	0.835529	1.6245e-17	2.29959e-16
ENSG00000188042	ARL4C	0.835445	1.89889e-06	9.10648e-06
ENSG00000166473	PKD1L2	0.835381	0.00679436	0.0176253
ENSG00000196208	GREB1	0.835233	0.00860541	0.021738
ENSG00000197580	BCO2	0.834927	0.00439399	0.011909
ENSG00000226314	ZNF192P1	0.834881	0.0177024	0.041183
ENSG00000164318	EGFLAM	0.834665	6.12281e-07	3.13176e-06
ENSG00000226479	TMEM185B	0.834087	2.8789e-20	4.89035e-19
ENSG00000079308	TNS1	0.83394	6.039e-17	8.1495e-16
ENSG00000249158	PCDHA11	0.833672	0.0148974	0.0354626
ENSG00000198208	RPS6KL1	0.833326	0.000703918	0.00225051
ENSG00000110002	VWA5A	0.832547	1.26817e-11	1.09536e-10
ENSG00000125848	FLRT3	0.832481	0.00524323	0.0139441
ENSG00000106330	MOSPD3	0.831775	1.93019e-09	1.32971e-08
ENSG00000174851	YIF1A	0.830159	1.06056e-32	3.72737e-31
ENSG00000234745	HLA-B	0.830158	7.317e-54	5.55662e-52
ENSG00000102312	PORCN	0.829614	9.91521e-16	1.21064e-14
ENSG00000133101	CCNA1	0.829232	0.0131665	0.03176
ENSG00000175182	FAM131A	0.828979	1.06819e-07	6.03781e-07
ENSG00000099999	RNF215	0.827865	3.98086e-11	3.25821e-10
ENSG00000167380	ZNF226	0.827399	6.95381e-15	7.92587e-14
ENSG00000173614	NMNAT1	0.82712	1.28232e-13	1.31735e-12
ENSG00000106034	CPED1	0.826901	0.0152882	0.0362724
ENSG00000158516	CPA2	0.826717	0.0215272	0.0487572
ENSG00000135678	CPM	0.826067	3.7448e-17	5.14678e-16
ENSG00000267534	S1PR2	0.825927	7.89433e-06	3.48232e-05
ENSG00000181218	HIST3H2A	0.825769	1.88419e-05	7.84167e-05
ENSG00000196743	GM2A	0.825732	6.58566e-34	2.43846e-32
ENSG00000117305	HMGCL	0.825585	2.70442e-17	3.75419e-16
ENSG00000255823	MTRNR2L8	0.824988	2.14683e-77	3.61508e-75
ENSG00000001460	STPG1	0.824936	1.34865e-12	1.26412e-11
ENSG00000135956	TMEM127	0.824329	1.09373e-33	3.9663e-32
ENSG00000168389	MFSD2A	0.823307	0.000522129	0.00171026
ENSG00000145217	SLC26A1	0.822743	0.0179432	0.041653
ENSG00000102100	SLC35A2	0.8227	2.13798e-22	4.18625e-21
ENSG00000099337	KCNK6	0.822569	1.7578e-05	7.35837e-05
ENSG00000105383	CD33	0.822391	0.00689428	0.0178606
ENSG00000132003	ZSWIM4	0.822328	1.02366e-22	2.04362e-21
ENSG00000241322	CDRT1	0.820128	6.51932e-09	4.26941e-08
ENSG00000237765	FAM200B	0.819602	1.24924e-20	2.17549e-19
ENSG00000011347	SYT7	0.819545	0.00133006	0.00401632
ENSG00000130517	PGPEP1	0.817818	6.73107e-17	9.0456e-16
ENSG00000196843	ARID5A	0.817522	4.69651e-05	0.000183807
ENSG00000184988	TMEM106A	0.816853	5.65355e-06	2.53899e-05
ENSG00000130827	PLXNA3	0.815812	3.11838e-31	1.01662e-29
ENSG00000163520	FBLN2	0.815733	8.19801e-06	3.60233e-05
ENSG00000175137	SH3BP5L	0.815685	1.62335e-25	3.829e-24
ENSG00000174917	C19orf70	0.815442	1.47443e-17	2.09174e-16
ENSG00000165071	TMEM71	0.814	0.0188368	0.0434566
ENSG00000131848	ZSCAN5A	0.814	6.05769e-07	3.1018e-06
ENSG00000105204	DYRK1B	0.813988	1.25592e-09	8.81829e-09
ENSG00000278318	ZNF229	0.812753	1.63518e-12	1.52091e-11
ENSG00000181045	SLC26A11	0.811986	3.94642e-12	3.56282e-11
ENSG00000133083	DCLK1	0.811251	9.18368e-07	4.58947e-06
ENSG00000042493	CAPG	0.811111	5.96206e-43	3.10364e-41
ENSG00000269028	MTRNR2L12	0.810809	6.80821e-60	6.40004e-58
ENSG00000160469	BRSK1	0.810279	0.000556542	0.00181316
ENSG00000105982	RNF32	0.810061	0.0139352	0.0334021
ENSG00000139899	CBLN3	0.80844	0.000878925	0.00275232
ENSG00000138111	MFSD13A	0.807944	2.69004e-06	1.25858e-05
ENSG00000145780	FEM1C	0.80793	4.09341e-23	8.33532e-22
ENSG00000196391	ZNF774	0.806983	6.80275e-11	5.43041e-10
ENSG00000104689	TNFRSF10A	0.806905	6.26304e-26	1.52367e-24
ENSG00000143315	PIGM	0.806571	1.86315e-18	2.82315e-17
ENSG00000159885	ZNF222	0.806161	1.32251e-05	5.63361e-05
ENSG00000159208	CIART	0.805159	0.00954902	0.0238972
ENSG00000054148	PHPT1	0.804593	3.24033e-38	1.42936e-36
ENSG00000142867	BCL10	0.804573	4.37436e-16	5.52573e-15
ENSG00000126947	ARMCX1	0.803747	5.48495e-07	2.81815e-06
ENSG00000144959	NCEH1	0.803307	3.40205e-24	7.45257e-23
ENSG00000078098	FAP	0.803177	4.88985e-14	5.21719e-13
ENSG00000170385	SLC30A1	0.80251	1.50428e-29	4.44062e-28
ENSG00000109072	VTN	0.802313	0.0217706	0.049251
ENSG00000169814	BTD	0.802038	8.42122e-20	1.39025e-18
ENSG00000173269	MMRN2	0.801823	8.08811e-06	3.55807e-05
ENSG00000205086	C2orf91	0.80045	0.0146797	0.0350088
ENSG00000131187	F12	0.800327	0.0200585	0.0458652
ENSG00000100314	CABP7	0.800323	0.0158592	0.0374438
ENSG00000171984	C20orf196	0.80004	0.0102473	0.0254606
ENSG00000183340	JRKL	0.799967	9.06795e-15	1.02272e-13
ENSG00000182378	PLCXD1	0.798958	6.61609e-23	1.32905e-21
ENSG00000234062	RP11-308D16.2	0.798773	0.000359659	0.00121422
ENSG00000170681	MURC	0.798581	0.00304998	0.00853264
ENSG00000135437	RDH5	0.798576	0.0112813	0.0277271
ENSG00000171159	C9orf16	0.798339	9.44644e-11	7.42412e-10
ENSG00000159314	ARHGAP27	0.798193	7.30523e-10	5.27858e-09
ENSG00000175287	PHYHD1	0.797213	5.32042e-06	2.39995e-05
ENSG00000059804	SLC2A3	0.796144	1.15896e-18	1.78973e-17
ENSG00000138030	KHK	0.795944	0.000229782	0.00079916
ENSG00000166532	RIMKLB	0.795537	1.13907e-35	4.47426e-34
ENSG00000142409	ZNF787	0.794954	3.92929e-14	4.21555e-13
ENSG00000173295	FAM86B3P	0.794823	0.000261977	0.000903829
ENSG00000079257	LXN	0.794179	5.02859e-09	3.32237e-08
ENSG00000135406	PRPH	0.793795	0.0150131	0.0356986
ENSG00000066455	GOLGA5	0.793586	1.03081e-28	2.90562e-27
ENSG00000240038	AMY2B	0.792968	0.000275482	0.000947214
ENSG00000072163	LIMS2	0.792603	9.30609e-16	1.13914e-14
ENSG00000169252	ADRB2	0.791985	3.00229e-10	2.24563e-09
ENSG00000134013	LOXL2	0.791649	8.32966e-43	4.31294e-41
ENSG00000165886	UBTD1	0.791645	3.66546e-06	1.68675e-05
ENSG00000185950	IRS2	0.791631	4.47845e-32	1.54041e-30
ENSG00000068078	FGFR3	0.791098	0.00192194	0.0056035
ENSG00000257704	INAFM1	0.791017	0.000325998	0.00110909
ENSG00000091879	ANGPT2	0.790578	0.0160717	0.0378762
ENSG00000172296	SPTLC3	0.790449	1.28566e-05	5.49236e-05
[truncated: 6,579 more rows]
