# Supplementary material for: The MYB-related transcription factor MYPOP acts as a selective regulator of cancer cell growth
Source: Research Square preprint supplement (doi:10.21203/rs.3.rs-3673301/v1), 2024-03-05
Supplement: Supplementary file 2 [file 5a46f84433e2f7f011b17612.xlsx]

## Sheet: Supplementary Table 2
Supplementary Table 2: HeLa RNA-Seq 6h post mRNA transfection
ENSEMBL ID	Gene symbol	Log2 fold change	P-value	Adjusted p-value
ENSG00000273217	CTC-432M15.3	9.71371	5.57414e-13	3.18732e-12
ENSG00000168334	XIRP1	7.55758	1.61055e-19	1.31491e-18
ENSG00000162891	IL20	7.40682	2.30497e-13	1.34384e-12
ENSG00000248710	RP11-432B6.3	7.36175	2.04387e-07	7.85138e-07
ENSG00000258465	RP11-574F21.3	7.31631	4.98208e-13	2.85675e-12
ENSG00000212724	KRTAP2-3	6.6758	5.60494e-15	3.59398e-14
ENSG00000158731	OR10J6P	6.2694	1.35963e-05	4.38501e-05
ENSG00000220773	RPSAP44	6.00506	2.83701e-05	8.86144e-05
ENSG00000264668	RP13-582O9.6	5.87107	4.53543e-05	0.000138566
ENSG00000214544	GTF2IRD2P1	5.64006	0.000104243	0.000306642
ENSG00000272104	XXcos-LUCA11.5	5.51745	0.000148361	0.000428353
ENSG00000164400	CSF2	5.48728	1.31864e-07	5.15678e-07
ENSG00000105509	HAS1	5.11001	0.000348384	0.000964769
ENSG00000105550	FGF21	5.0461	2.07972e-12	1.15481e-11
ENSG00000198842	DUSP27	5.03689	2.4944e-16	1.72549e-15
ENSG00000249834	PGBD4P3	4.98114	0.000464901	0.00126557
ENSG00000236123	CEACAMP11	4.98008	0.000465807	0.00126785
ENSG00000232133	IMPDH1P10	4.78561	1.56802e-07	6.09455e-07
ENSG00000110900	TSPAN11	4.764	5.09718e-05	0.000154678
ENSG00000277729	GU182352.6	4.65915	0.00099051	0.00258568
ENSG00000162892	IL24	4.61084	8.51135e-132	1.65165e-129
ENSG00000205108	FAM205A	4.54526	0.000118973	0.000347972
ENSG00000125998	FAM83C	4.46291	9.98567e-05	0.000294208
ENSG00000256849	RP11-405A12.1	4.36527	0.000184872	0.000528062
ENSG00000250292	RP11-451F20.1	4.35169	0.000206335	0.000585468
ENSG00000157368	IL34	4.1558	0.000126386	0.000368194
ENSG00000184697	CLDN6	4.10324	4.10537e-08	1.6781e-07
ENSG00000057149	SERPINB3	4.09675	0.000443299	0.00121034
ENSG00000170298	LGALS9B	3.98529	0.000676632	0.00180621
ENSG00000131737	KRT34	3.91671	1.52233e-05	4.87901e-05
ENSG00000223401	RP11-211G3.2	3.89976	0.0010269	0.00267536
ENSG00000273597	RP11-392A14.9	3.89918	0.000663972	0.00177447
ENSG00000117069	ST6GALNAC5	3.85826	0.000232991	0.000657461
ENSG00000187833	C2orf78	3.74801	0.00118893	0.00307059
ENSG00000186919	ZACN	3.73215	3.55161e-31	4.98279e-30
ENSG00000166592	RRAD	3.68682	1.65178e-35	2.71881e-34
ENSG00000261089	RP11-435I10.3	3.65802	6.01953e-05	0.000181117
ENSG00000198829	SUCNR1	3.64181	7.98941e-05	0.000237556
ENSG00000095752	IL11	3.60245	0	0
ENSG00000168631	DPCR1	3.60152	0.00158056	0.00401842
ENSG00000170848	PSG6	3.58924	5.3709e-13	3.07302e-12
ENSG00000216588	IGSF23	3.54884	2.3568e-10	1.13618e-09
ENSG00000130513	GDF15	3.53454	3.95331e-125	6.94089e-123
ENSG00000158246	FAM46B	3.53037	5.64617e-254	6.50545e-251
ENSG00000117407	ARTN	3.42298	6.80684e-48	1.87851e-46
ENSG00000169067	ACTBL2	3.38198	5.4141e-17	3.85809e-16
ENSG00000221878	PSG7	3.36973	1.4512e-05	4.66485e-05
ENSG00000012223	LTF	3.34412	3.14217e-13	1.81814e-12
ENSG00000115008	IL1A	3.34259	6.83328e-98	7.32393e-96
ENSG00000182901	RGS7	3.30899	1.55263e-06	5.49803e-06
ENSG00000158683	PKD1L1	3.3056	0.00220649	0.00549016
ENSG00000214534	ZNF705E	3.28721	0.000391965	0.0010764
ENSG00000183668	PSG9	3.27246	2.17024e-09	9.73679e-09
ENSG00000214249	CTAGE11P	3.22955	0.000511611	0.00138516
ENSG00000148677	ANKRD1	3.22922	0	0
ENSG00000153233	PTPRR	3.19636	7.97322e-41	1.64968e-39
ENSG00000268223	ARL14EPL	3.18313	0.0016889	0.00427618
ENSG00000163825	RTP3	3.17277	0.00179792	0.00453476
ENSG00000179046	TRIML2	3.15238	1.41514e-37	2.57025e-36
ENSG00000253861	SLC2A3P1	3.12389	8.45286e-06	2.78116e-05
ENSG00000139269	INHBE	3.12083	2.60529e-21	2.32471e-20
ENSG00000181634	TNFSF15	3.12005	1.06509e-49	3.15168e-48
ENSG00000166046	TCP11L2	3.11673	5.2951e-16	3.60336e-15
ENSG00000110876	SELPLG	3.09925	1.29726e-13	7.68232e-13
ENSG00000104804	TULP2	3.09848	0.00192383	0.00482527
ENSG00000135744	AGT	3.06277	1.38182e-06	4.92189e-06
ENSG00000178031	ADAMTSL1	3.04241	6.52487e-09	2.83292e-08
ENSG00000204941	PSG5	3.01246	1.45599e-13	8.58643e-13
ENSG00000268879	IGFL1P1	2.99606	8.00054e-31	1.10479e-29
ENSG00000232517	AC112198.1	2.99274	0.00263347	0.00648172
ENSG00000206073	SERPINB4	2.9881	0.00246752	0.0060985
ENSG00000073282	TP63	2.96615	1.45241e-32	2.1489e-31
ENSG00000123405	NFE2	2.95543	6.01192e-08	2.42092e-07
ENSG00000164463	CREBRF	2.93382	2.55023e-103	2.97554e-101
ENSG00000231924	PSG1	2.92599	1.96781e-20	1.68415e-19
ENSG00000144893	MED12L	2.91436	1.41739e-06	5.04043e-06
ENSG00000248751	RP1-130H16.18	2.90863	3.49106e-05	0.000107802
ENSG00000137094	DNAJB5	2.88915	0	0
ENSG00000159588	CCDC17	2.88006	2.58579e-12	1.42936e-11
ENSG00000112499	SLC22A2	2.86333	1.0996e-12	6.18587e-12
ENSG00000234498	RPL13AP20	2.85791	2.06998e-24	2.17189e-23
ENSG00000260342	RP11-1035H13.3	2.85635	3.04504e-15	1.98288e-14
ENSG00000256069	A2MP1	2.84442	1.55759e-11	8.18999e-11
ENSG00000237575	PYY2	2.83726	0.00150716	0.0038424
ENSG00000104415	WISP1	2.83217	0.001341	0.00344452
ENSG00000168398	BDKRB2	2.83108	8.74816e-49	2.50812e-47
ENSG00000125538	IL1B	2.80534	1.5441e-14	9.66241e-14
ENSG00000242120	RP11-231I13.2	2.79982	2.63086e-05	8.24268e-05
ENSG00000174473	GALNTL6	2.79955	8.9258e-34	1.39329e-32
ENSG00000224321	RPL12P14	2.78302	2.28122e-47	6.0772e-46
ENSG00000270490	RP11-622C24.1	2.76193	0.00163714	0.00415084
ENSG00000143387	CTSK	2.76112	3.68367e-15	2.38443e-14
ENSG00000170615	SLC26A5	2.75694	0.000831968	0.00219858
ENSG00000262748	AC004231.7	2.75302	9.01291e-07	3.27008e-06
ENSG00000091656	ZFHX4	2.73134	7.96107e-19	6.30422e-18
ENSG00000136367	ZFHX2	2.72001	2.03723e-06	7.12373e-06
ENSG00000106366	SERPINE1	2.68058	0	0
ENSG00000183128	CALHM3	2.67225	7.29054e-06	2.41121e-05
ENSG00000268736	MTCO3P39	2.66574	0.00543158	0.0126812
ENSG00000157322	CLEC18A	2.65715	0.00108824	0.00282481
ENSG00000215182	MUC5AC	2.64993	1.54318e-15	1.02039e-14
ENSG00000135437	RDH5	2.64468	2.77973e-09	1.23898e-08
ENSG00000233974	RP11-823P9.3	2.64124	1.18896e-05	3.85619e-05
ENSG00000099139	PCSK5	2.63997	9.98469e-18	7.43107e-17
ENSG00000273897	CH17-264B6.4	2.63124	0.000965643	0.00252541
ENSG00000230280	HNRNPA1P59	2.62632	1.06521e-06	3.83651e-06
ENSG00000175946	KLHL38	2.61371	2.40822e-06	8.34974e-06
ENSG00000156097	GPR61	2.58779	0.00524356	0.0122781
ENSG00000184571	PIWIL3	2.58527	0.000299332	0.00083432
ENSG00000238109	AC004893.10	2.5723	0.00179123	0.00451851
ENSG00000220517	ASS1P1	2.56964	0.00142338	0.00364293
ENSG00000198768	APCDD1L	2.56893	4.28928e-09	1.88628e-08
ENSG00000121104	FAM117A	2.55381	1.51411e-05	4.85436e-05
ENSG00000010379	SLC6A13	2.54844	0.00149034	0.00380322
ENSG00000109101	FOXN1	2.53357	1.19113e-21	1.08063e-20
ENSG00000141738	GRB7	2.53291	1.45606e-28	1.8512e-27
ENSG00000271237	RP11-140C5.3	2.52951	0.00622639	0.0143731
ENSG00000166750	SLFN5	2.52225	1.54873e-190	7.13773e-188
ENSG00000143469	SYT14	2.5184	8.42459e-06	2.77285e-05
ENSG00000124216	SNAI1	2.51571	1.60489e-124	2.76506e-122
ENSG00000243244	STON1	2.51421	5.18521e-15	3.32832e-14
ENSG00000180043	FAM71E2	2.50108	0.00584748	0.0135681
ENSG00000198553	KCNRG	2.4938	1.42997e-09	6.50582e-09
ENSG00000232810	TNF	2.49038	8.44121e-05	0.000250465
ENSG00000176092	AIM1L	2.47997	2.62854e-21	2.34432e-20
ENSG00000144671	SLC22A14	2.47819	0.000117271	0.000343321
ENSG00000170276	HSPB2	2.47258	1.01493e-08	4.35326e-08
ENSG00000236238	AC093106.4	2.45357	0.00733712	0.0167318
ENSG00000179674	ARL14	2.44725	0.000234709	0.000661801
ENSG00000257529	RPL36A-HNRNPH2	2.44044	1.83459e-19	1.49252e-18
ENSG00000132801	ZSWIM3	2.43509	2.84685e-50	8.61769e-49
ENSG00000182795	C1orf116	2.43112	2.83837e-35	4.64289e-34
ENSG00000169085	C8orf46	2.43092	1.40961e-10	6.91122e-10
ENSG00000184564	SLITRK6	2.42933	9.36029e-27	1.0956e-25
ENSG00000173175	ADCY5	2.41786	8.02167e-05	0.0002384
ENSG00000197769	MAP1LC3C	2.41738	0.00754912	0.0171791
ENSG00000107165	TYRP1	2.41544	7.96155e-05	0.000236789
ENSG00000197632	SERPINB2	2.37351	0.00102763	0.00267689
ENSG00000182261	NLRP10	2.37011	0.00136551	0.00350309
ENSG00000047648	ARHGAP6	2.36582	4.07302e-05	0.000125018
ENSG00000058085	LAMC2	2.35973	5.27211e-40	1.05414e-38
ENSG00000131435	PDLIM4	2.35561	0.00239171	0.00592704
ENSG00000219891	ZSCAN12P1	2.3525	0.000277645	0.000776454
ENSG00000220412	RP11-95M15.2	2.35087	0.00418504	0.00997173
ENSG00000142920	AZIN2	2.34574	7.36676e-09	3.18719e-08
ENSG00000122733	PHF24	2.332	0.0084084	0.0189613
ENSG00000235354	CTA-276O3.4	2.31849	0.00434521	0.0103227
ENSG00000178878	APOLD1	2.31345	2.18312e-53	7.29092e-52
ENSG00000171385	KCND3	2.31231	4.0897e-16	2.80065e-15
ENSG00000163810	TGM4	2.31063	3.82966e-05	0.000117863
ENSG00000243137	PSG4	2.308	2.49646e-19	2.02473e-18
ENSG00000172738	TMEM217	2.30107	9.11546e-21	7.91538e-20
ENSG00000137745	MMP13	2.29327	0.00205382	0.00512969
ENSG00000171509	RXFP1	2.27769	1.08266e-05	3.52443e-05
ENSG00000168427	KLHL30	2.27543	9.65517e-11	4.78476e-10
ENSG00000184716	SERINC4	2.27455	0.00198303	0.00496566
ENSG00000100053	CRYBB3	2.2726	2.72285e-05	8.51932e-05
ENSG00000216906	RP11-350J20.9	2.26928	6.7246e-05	0.000201279
ENSG00000139985	ADAM21	2.26585	0.00489046	0.0115127
ENSG00000165887	ANKRD2	2.25574	4.55922e-06	1.53936e-05
ENSG00000179284	DAND5	2.25132	3.82617e-05	0.000117775
ENSG00000100121	GGTLC2	2.24927	0.00520315	0.0121896
ENSG00000156427	FGF18	2.23906	0.00100929	0.00263208
ENSG00000237330	RNF223	2.2248	0.000201361	0.000572766
ENSG00000130766	SESN2	2.20466	1.36207e-203	7.84679e-201
ENSG00000272869	CTC-487M23.8	2.19602	5.18097e-51	1.60793e-49
ENSG00000189350	FAM179A	2.19067	2.6868e-57	9.96602e-56
ENSG00000001626	CFTR	2.15217	0.000121872	0.000355886
ENSG00000157680	DGKI	2.14791	5.19698e-09	2.26868e-08
ENSG00000115221	ITGB6	2.14142	1.36562e-08	5.80475e-08
ENSG00000189195	BTBD8	2.1408	0.00249852	0.00616932
ENSG00000280273	AF131216.1	2.13815	0.00329904	0.00799814
ENSG00000243130	PSG11	2.12774	0.00104279	0.00271293
ENSG00000106823	ECM2	2.12398	3.34473e-09	1.4815e-08
ENSG00000142623	PADI1	2.12304	1.89657e-37	3.43789e-36
ENSG00000148204	CRB2	2.11998	0.00330062	0.00800091
ENSG00000128165	ADM2	2.11802	3.50161e-28	4.36754e-27
ENSG00000263368	RP11-720N19.1	2.11547	0.00167768	0.00425059
ENSG00000169933	FRMPD4	2.11172	3.28078e-05	0.000101683
ENSG00000134198	TSPAN2	2.10161	4.1046e-32	5.96284e-31
ENSG00000134061	CD180	2.09524	1.2695e-08	5.40489e-08
ENSG00000142224	IL19	2.09363	0.000559451	0.00150782
ENSG00000167723	TRPV3	2.08084	1.55109e-06	5.49363e-06
ENSG00000204610	TRIM15	2.07045	2.15913e-09	9.68929e-09
ENSG00000240522	RPL7AP10	2.06855	0.0020024	0.0050094
ENSG00000108691	CCL2	2.06558	1.075e-96	1.10713e-94
ENSG00000248905	FMN1	2.06122	1.71895e-118	2.75555e-116
ENSG00000052344	PRSS8	2.0605	1.81585e-05	5.78055e-05
ENSG00000214822	KRT16P3	2.05989	0.00986203	0.0219626
ENSG00000204420	C6orf25	2.05908	1.18188e-05	3.83389e-05
ENSG00000164440	TXLNB	2.04874	0.00993454	0.0221187
ENSG00000168497	SDPR	2.04254	6.48164e-38	1.1925e-36
ENSG00000179772	FOXS1	2.03264	6.47715e-27	7.64934e-26
ENSG00000183508	FAM46C	2.03167	1.86509e-05	5.92503e-05
ENSG00000181016	LSMEM1	2.03011	1.79358e-14	1.11667e-13
ENSG00000204421	LY6G6C	2.02368	0.00102866	0.00267882
ENSG00000204613	TRIM10	2.02276	6.75695e-06	2.24157e-05
ENSG00000136274	NACAD	2.01616	2.92649e-32	4.27495e-31
ENSG00000187908	DMBT1	2.01603	1.00928e-34	1.62926e-33
ENSG00000005238	FAM214B	2.00236	1.55084e-143	4.08426e-141
ENSG00000169994	MYO7B	1.99476	3.56303e-11	1.82762e-10
ENSG00000060140	STYK1	1.99276	2.11808e-08	8.84614e-08
ENSG00000117601	SERPINC1	1.99092	0.00774834	0.0175912
ENSG00000204099	NEU4	1.97457	0.00225646	0.00560996
ENSG00000143110	C1orf162	1.97285	6.90887e-05	0.000206594
ENSG00000160781	PAQR6	1.96973	6.6822e-07	2.45196e-06
ENSG00000180777	ANKRD30B	1.96936	1.38752e-09	6.31893e-09
ENSG00000117586	TNFSF4	1.96299	0.000154392	0.000444721
ENSG00000227440	ATP5G1P4	1.9612	1.67439e-06	5.90197e-06
ENSG00000162426	SLC45A1	1.95881	0.00451753	0.010699
ENSG00000162241	SLC25A45	1.9585	1.88829e-57	7.03243e-56
ENSG00000114378	HYAL1	1.95608	1.19114e-45	2.97908e-44
ENSG00000058866	DGKG	1.95405	0.000102602	0.000302104
ENSG00000108405	P2RX1	1.95349	4.39727e-12	2.3962e-11
ENSG00000276289	KCNE1B	1.94904	0.000353221	0.000977281
ENSG00000170091	HMP19	1.94353	0.0104539	0.0231911
ENSG00000241104	CEACAMP10	1.93572	0.00451034	0.0106847
ENSG00000011083	SLC6A7	1.92396	0.000381509	0.00104956
ENSG00000204977	TRIM13	1.91632	3.47535e-81	2.55251e-79
ENSG00000087074	PPP1R15A	1.91139	0	0
ENSG00000204936	CD177	1.90733	1.66257e-06	5.86258e-06
ENSG00000185507	IRF7	1.90273	1.57402e-14	9.84295e-14
ENSG00000174343	CHRNA9	1.89727	7.54896e-08	3.00573e-07
ENSG00000113721	PDGFRB	1.89654	2.98624e-102	3.39823e-100
ENSG00000176046	NUPR1	1.89622	3.1967e-50	9.66086e-49
ENSG00000173614	NMNAT1	1.88183	9.82524e-67	4.83009e-65
ENSG00000276600	RAB7B	1.88084	0.00339859	0.00821787
ENSG00000241839	PLEKHO2	1.87481	1.71788e-49	5.03483e-48
ENSG00000048052	HDAC9	1.87418	2.22699e-14	1.37952e-13
ENSG00000014914	MTMR11	1.8707	5.73774e-45	1.401e-43
ENSG00000060642	PIGV	1.86971	6.30443e-49	1.82166e-47
ENSG00000225760	LINC00431	1.86548	0.000871178	0.00229464
ENSG00000171502	COL24A1	1.86519	9.06631e-05	0.00026858
ENSG00000129009	ISLR	1.86482	8.39613e-05	0.000249207
ENSG00000123610	TNFAIP6	1.86333	3.95789e-08	1.62034e-07
ENSG00000182459	TEX19	1.85975	5.16442e-05	0.000156589
ENSG00000122861	PLAU	1.85686	3.8419e-64	1.74018e-62
ENSG00000088538	DOCK3	1.85451	7.36541e-15	4.6902e-14
ENSG00000240583	AQP1	1.84895	2.0163e-188	8.85011e-186
ENSG00000187242	KRT12	1.84278	0.00374041	0.00898664
ENSG00000124313	IQSEC2	1.83488	3.66399e-73	2.15801e-71
ENSG00000197181	PIWIL2	1.83413	2.0132e-06	7.04103e-06
ENSG00000128510	CPA4	1.82734	1.84243e-306	3.08775e-303
ENSG00000125848	FLRT3	1.82608	2.05261e-09	9.23826e-09
ENSG00000166924	NYAP1	1.82529	0.00189556	0.00476041
ENSG00000186832	KRT16	1.81563	4.24013e-23	4.138e-22
ENSG00000249936	RAC1P2	1.81223	6.93667e-07	2.54e-06
ENSG00000165861	ZFYVE1	1.81109	1.05607e-55	3.75844e-54
ENSG00000184939	ZFP90	1.80891	3.70976e-31	5.20071e-30
ENSG00000128342	LIF	1.80404	4.60057e-232	4.46376e-229
ENSG00000158296	SLC13A3	1.80295	0.00389726	0.00933551
ENSG00000165181	C9orf84	1.79922	1.27386e-09	5.81134e-09
ENSG00000162520	SYNC	1.79772	1.46931e-207	9.34026e-205
ENSG00000138347	MYPN	1.79422	1.0828e-223	8.67891e-221
ENSG00000183671	GPR1	1.78828	5.96738e-85	4.80387e-83
ENSG00000125966	MMP24	1.78438	1.68835e-11	8.85483e-11
ENSG00000168685	IL7R	1.78414	0	0
ENSG00000163898	LIPH	1.78316	1.45311e-10	7.11313e-10
ENSG00000253330	RP11-697N18.3	1.78119	0.000248153	0.000697469
ENSG00000164010	ERMAP	1.77663	4.35628e-48	1.21495e-46
ENSG00000137868	STRA6	1.77588	1.40587e-37	2.55846e-36
ENSG00000224389	C4B	1.76855	0.000361614	0.000998257
ENSG00000059804	SLC2A3	1.76652	9.40816e-90	8.67197e-88
ENSG00000128298	BAIAP2L2	1.7665	0.0117963	0.0259165
ENSG00000239282	GATSL3	1.75999	9.14594e-05	0.000270861
ENSG00000122641	INHBA	1.75943	1.15561e-14	7.28082e-14
ENSG00000230666	CEACAM22P	1.75789	0.000211363	0.000598997
ENSG00000067715	SYT1	1.75777	8.11905e-07	2.958e-06
ENSG00000197808	ZNF461	1.7549	1.32563e-05	4.28162e-05
ENSG00000101276	SLC52A3	1.7549	3.40783e-05	0.000105408
ENSG00000166343	MSS51	1.75392	2.08734e-09	9.38766e-09
ENSG00000060558	GNA15	1.75322	0.000918873	0.00241234
ENSG00000114268	PFKFB4	1.75265	2.63148e-73	1.55985e-71
ENSG00000123342	MMP19	1.74876	3.12824e-06	1.07271e-05
ENSG00000181577	C6orf223	1.74283	1.21714e-55	4.3067e-54
ENSG00000135960	EDAR	1.73471	1.52913e-05	4.89828e-05
ENSG00000168916	ZNF608	1.73317	1.86044e-06	6.53404e-06
ENSG00000260458	KCNJ18	1.7318	3.07059e-06	1.05412e-05
ENSG00000171608	PIK3CD	1.73095	1.3604e-24	1.44214e-23
ENSG00000071203	MS4A12	1.7274	0.000215905	0.000611212
ENSG00000227799	AC012358.4	1.72587	2.57599e-05	8.07763e-05
ENSG00000110925	CSRNP2	1.72549	2.98017e-136	6.78265e-134
ENSG00000135205	CCDC146	1.7244	0.00153334	0.00390647
ENSG00000175197	DDIT3	1.72272	2.90829e-77	1.94961e-75
ENSG00000129221	AIPL1	1.71967	0.000516057	0.00139658
ENSG00000152822	GRM1	1.71909	2.1153e-09	9.50415e-09
ENSG00000142619	PADI3	1.71764	7.04123e-05	0.000210449
ENSG00000100246	DNAL4	1.71399	1.5183e-19	1.24068e-18
ENSG00000105204	DYRK1B	1.71372	2.38785e-42	5.22803e-41
ENSG00000166816	LDHD	1.7135	0.00154462	0.00393139
ENSG00000263155	MYZAP	1.71316	1.79782e-11	9.40242e-11
ENSG00000189143	CLDN4	1.71001	5.72147e-105	6.93916e-103
ENSG00000186451	SPATA12	1.70426	1.01973e-05	3.3272e-05
ENSG00000140287	HDC	1.69878	0.000589824	0.00158505
ENSG00000110799	VWF	1.69535	0.000747353	0.00198723
ENSG00000179922	ZNF784	1.69345	4.81372e-20	4.03735e-19
ENSG00000240891	PLCXD2	1.69204	1.44884e-95	1.45952e-93
ENSG00000196189	SEMA4A	1.68747	0.00182513	0.00459459
ENSG00000170667	RASA4B	1.6855	1.13317e-25	1.26376e-24
ENSG00000137331	IER3	1.6849	2.93988e-182	1.20437e-179
ENSG00000172927	MYEOV	1.68282	2.89551e-57	1.06971e-55
ENSG00000064270	ATP2C2	1.68281	8.39021e-06	2.76351e-05
ENSG00000130045	NXNL2	1.67744	1.01367e-12	5.71995e-12
ENSG00000124224	PPP4R1L	1.67564	3.52192e-47	9.30179e-46
ENSG00000230528	NOS2P3	1.67212	0.00581002	0.0134879
ENSG00000118971	CCND2	1.66945	0.00530082	0.0124058
ENSG00000171428	NAT1	1.65682	6.75243e-22	6.18079e-21
ENSG00000182175	RGMA	1.65572	4.39889e-06	1.48795e-05
ENSG00000140465	CYP1A1	1.65415	1.43873e-24	1.52168e-23
ENSG00000246203	RP11-29H23.5	1.65119	0.00228096	0.0056678
ENSG00000184545	DUSP8	1.65078	1.72754e-33	2.66059e-32
ENSG00000175938	ORAI3	1.65076	7.40829e-12	3.97011e-11
ENSG00000166793	YPEL4	1.65036	0.00204442	0.00510829
ENSG00000116584	ARHGEF2	1.64763	4.39679e-208	2.89481e-205
ENSG00000177000	MTHFR	1.6358	1.0132e-78	7.07514e-77
ENSG00000186831	KRT17P2	1.63309	1.47695e-26	1.71566e-25
ENSG00000168016	TRANK1	1.63059	1.55814e-36	2.71717e-35
ENSG00000231672	DIRC3	1.6253	0.00289298	0.00708261
ENSG00000224722	RP11-255B23.1	1.62437	0.00746783	0.0170088
ENSG00000153029	MR1	1.62148	1.45832e-47	3.94774e-46
ENSG00000185361	TNFAIP8L1	1.62009	1.07585e-39	2.12575e-38
ENSG00000172940	SLC22A13	1.61971	0.00646297	0.0148782
ENSG00000099992	TBC1D10A	1.61784	8.49772e-32	1.22196e-30
ENSG00000165507	C10orf10	1.61734	2.24298e-05	7.07551e-05
ENSG00000052802	MSMO1	1.61446	2.3503e-146	6.37174e-144
ENSG00000133808	MICALCL	1.6111	2.18334e-07	8.35926e-07
ENSG00000255641	RP11-277P12.6	1.60837	1.85844e-05	5.90694e-05
ENSG00000167074	TEF	1.60749	2.49307e-38	4.6471e-37
ENSG00000156500	FAM122C	1.60475	5.27912e-17	3.76628e-16
ENSG00000221843	C2orf16	1.60398	1.83457e-08	7.70743e-08
ENSG00000163795	ZNF513	1.59429	1.48977e-30	2.02985e-29
ENSG00000132005	RFX1	1.58851	1.80576e-33	2.77872e-32
ENSG00000185332	TMEM105	1.5838	0.00217706	0.00541987
ENSG00000101040	ZMYND8	1.58198	2.91465e-85	2.36703e-83
ENSG00000182310	SPACA6	1.58136	2.62459e-22	2.4573e-21
ENSG00000173269	MMRN2	1.57982	1.08959e-14	6.87894e-14
ENSG00000277639	RP11-467J12.4	1.57981	0.00353443	0.00852396
ENSG00000204540	PSORS1C1	1.57883	5.26878e-10	2.47718e-09
ENSG00000122477	LRRC39	1.57806	1.36177e-05	4.39116e-05
ENSG00000099889	ARVCF	1.57643	2.14917e-09	9.64695e-09
ENSG00000168477	TNXB	1.57425	2.95543e-36	5.07766e-35
ENSG00000143322	ABL2	1.57335	0	0
ENSG00000177494	ZBED2	1.57228	0.0014991	0.0038245
ENSG00000160469	BRSK1	1.57014	6.78768e-11	3.3966e-10
ENSG00000130052	STARD8	1.56918	9.65521e-21	8.3683e-20
ENSG00000228695	CES1P1	1.56839	0.0134451	0.0291944
ENSG00000184185	KCNJ12	1.5674	1.8173e-75	1.15924e-73
ENSG00000012124	CD22	1.56422	0.000355748	0.000983388
ENSG00000131885	KRT17P1	1.5617	1.51644e-36	2.64732e-35
ENSG00000253309	SERPINE3	1.56095	0.00300711	0.00734641
ENSG00000213928	IRF9	1.55877	5.30143e-30	7.08863e-29
ENSG00000100889	PCK2	1.55763	3.62729e-72	2.07668e-70
ENSG00000173237	C11orf86	1.55733	2.16388e-08	9.03536e-08
ENSG00000110002	VWA5A	1.55655	1.99909e-29	2.62301e-28
ENSG00000138271	GPR87	1.55529	0.000137135	0.000397436
ENSG00000144460	NYAP2	1.55132	2.24493e-36	3.88959e-35
ENSG00000091428	RAPGEF4	1.55015	1.63188e-05	5.21832e-05
ENSG00000155749	ALS2CR12	1.53905	0.000329497	0.0009148
ENSG00000204262	COL5A2	1.53713	4.03922e-36	6.91393e-35
ENSG00000085465	OVGP1	1.5352	0.00112135	0.00290337
ENSG00000243566	UPK3B	1.53487	2.224e-10	1.07413e-09
ENSG00000243649	CFB	1.52674	1.3745e-13	8.12144e-13
ENSG00000130775	THEMIS2	1.52391	0.0011636	0.0030077
ENSG00000158516	CPA2	1.52298	7.06219e-05	0.000211012
ENSG00000268995	VN1R82P	1.52083	0.00623397	0.0143888
ENSG00000188766	SPRED3	1.51319	7.31574e-05	0.000218229
ENSG00000196110	ZNF699	1.5083	4.09058e-17	2.94455e-16
ENSG00000120051	CFAP58	1.50422	0.000371785	0.0010248
ENSG00000164404	GDF9	1.50352	0.00440043	0.0104431
ENSG00000171303	KCNK3	1.50313	1.78771e-17	1.3151e-16
ENSG00000164331	ANKRA2	1.50026	4.92894e-19	3.94722e-18
ENSG00000152433	ZNF547	1.49631	1.94875e-09	8.78365e-09
ENSG00000139178	C1RL	1.49599	1.61485e-39	3.16699e-38
ENSG00000267281	RP11-793H13.10	1.49193	6.55108e-08	2.62827e-07
ENSG00000112972	HMGCS1	1.48473	1.28426e-294	1.97295e-291
ENSG00000205426	KRT81	1.48429	2.45981e-14	1.51915e-13
ENSG00000228206	AC016717.1	1.48147	5.30845e-07	1.96706e-06
ENSG00000163803	PLB1	1.47958	3.22529e-06	1.10394e-05
ENSG00000143507	DUSP10	1.47909	2.97166e-19	2.40274e-18
ENSG00000166436	TRIM66	1.47626	7.71021e-34	1.20763e-32
ENSG00000205464	ATP6AP1L	1.47594	9.78904e-05	0.000288691
ENSG00000108375	RNF43	1.4736	4.51686e-16	3.08516e-15
ENSG00000038427	VCAN	1.47313	4.97801e-05	0.00015121
ENSG00000089916	GPATCH2L	1.471	5.04298e-134	1.08102e-131
ENSG00000179361	ARID3B	1.46987	1.13385e-33	1.76541e-32
ENSG00000100078	PLA2G3	1.46596	0.00023465	0.000661801
ENSG00000237984	PTENP1	1.46554	0.000120645	0.000352414
ENSG00000124466	LYPD3	1.46461	4.08948e-10	1.93804e-09
ENSG00000283632	EXOC3L2	1.46438	0.00102912	0.00267964
ENSG00000170835	CEL	1.4609	0.00883001	0.0198441
ENSG00000236252	RP11-15J10.8	1.46035	0.0102076	0.0226801
ENSG00000100592	DAAM1	1.45877	6.45942e-105	7.78297e-103
ENSG00000073737	DHRS9	1.45836	0.000429513	0.00117496
ENSG00000161912	ADCY10P1	1.45664	4.21424e-07	1.5733e-06
ENSG00000243646	IL10RB	1.45636	8.53383e-53	2.78938e-51
ENSG00000163637	PRICKLE2	1.45117	1.48655e-07	5.78764e-07
ENSG00000172748	ZNF596	1.45112	6.4554e-09	2.8054e-08
ENSG00000197646	PDCD1LG2	1.45105	0.000939747	0.00246398
ENSG00000243225	RP11-7F17.1	1.45089	0.00277708	0.00681698
ENSG00000130164	LDLR	1.44824	2.73614e-242	2.80226e-239
ENSG00000171984	C20orf196	1.44802	2.27665e-05	7.17681e-05
ENSG00000188033	ZNF490	1.44773	3.52174e-07	1.322e-06
ENSG00000104368	PLAT	1.44439	9.18437e-11	4.5568e-10
ENSG00000143631	FLG	1.44407	0.00012948	0.000376671
ENSG00000140481	CCDC33	1.44365	0.00376797	0.00904814
ENSG00000182600	C2orf82	1.43406	0.000134734	0.000391154
ENSG00000108839	ALOX12	1.43214	3.35515e-05	0.000103866
ENSG00000228570	NUTM2E	1.42974	0.000613811	0.00164615
ENSG00000133121	STARD13	1.42658	2.66312e-71	1.48772e-69
ENSG00000186204	CYP4F12	1.42528	2.6725e-05	8.36745e-05
ENSG00000198835	GJC2	1.41918	3.35919e-07	1.26381e-06
ENSG00000170581	STAT2	1.41425	3.88139e-54	1.32261e-52
ENSG00000095932	SMIM24	1.41409	0.00371075	0.00892118
ENSG00000171403	KRT9	1.41205	1.03112e-09	4.7486e-09
ENSG00000223510	CDRT15	1.41153	0.00477212	0.0112571
ENSG00000164951	PDP1	1.4112	6.44941e-71	3.53854e-69
ENSG00000102057	KCND1	1.41073	8.13212e-14	4.86423e-13
ENSG00000164850	GPER1	1.40805	5.12085e-05	0.000155345
ENSG00000213297	ZNF625-ZNF20	1.40529	3.18028e-07	1.19845e-06
ENSG00000159784	FAM131B	1.40481	0.00942218	0.0210568
ENSG00000267258	CTC-448F2.3	1.40478	0.010098	0.0224566
ENSG00000157613	CREB3L1	1.39795	1.31142e-43	3.03337e-42
ENSG00000100290	BIK	1.39749	0.00766608	0.0174195
ENSG00000179941	BBS10	1.392	3.24477e-44	7.71838e-43
ENSG00000058335	RASGRF1	1.39026	0.00263702	0.00648959
ENSG00000196967	ZNF585A	1.38988	4.11484e-28	5.11166e-27
ENSG00000160318	CLDND2	1.38496	0.00253951	0.00626298
ENSG00000092295	TGM1	1.38467	7.78823e-46	1.96949e-44
ENSG00000146411	SLC2A12	1.37917	1.02633e-09	4.72775e-09
ENSG00000239887	C1orf226	1.3745	3.34561e-08	1.3767e-07
ENSG00000187689	AMTN	1.37422	4.93082e-08	1.99911e-07
ENSG00000131944	FAAP24	1.36888	9.11817e-29	1.16894e-27
ENSG00000163794	UCN	1.36874	0.00268805	0.00660723
ENSG00000106261	ZKSCAN1	1.36691	2.57139e-160	8.31642e-158
ENSG00000186834	HEXIM1	1.36659	6.66503e-194	3.41305e-191
ENSG00000197779	ZNF81	1.35886	3.91621e-33	5.9469e-32
ENSG00000122877	EGR2	1.35838	2.89535e-05	9.03143e-05
ENSG00000005102	MEOX1	1.35612	8.43033e-23	8.06085e-22
ENSG00000109193	SULT1E1	1.35081	0.000203847	0.000579032
ENSG00000179862	CITED4	1.35044	2.33197e-13	1.35872e-12
ENSG00000162931	TRIM17	1.35013	0.0049033	0.0115414
ENSG00000183171	RP11-49C9.2	1.34987	0.012768	0.0278587
ENSG00000283321	RP11-507K12.1	1.34819	0.00447516	0.0106082
ENSG00000183621	ZNF438	1.34553	2.08862e-13	1.21963e-12
ENSG00000156671	SAMD8	1.34463	1.0855e-73	6.51827e-72
ENSG00000119943	PYROXD2	1.34288	3.443e-27	4.12422e-26
ENSG00000160471	COX6B2	1.34216	3.60255e-05	0.000111077
ENSG00000175294	CATSPER1	1.34021	1.98992e-06	6.96492e-06
ENSG00000221955	SLC12A8	1.33437	3.8892e-79	2.73654e-77
ENSG00000173295	FAM86B3P	1.33342	5.60938e-08	2.26228e-07
ENSG00000185670	ZBTB3	1.33334	3.01247e-15	1.96236e-14
ENSG00000174125	TLR1	1.33296	0.00288578	0.00706592
ENSG00000112077	RHAG	1.3309	0.00628282	0.014487
ENSG00000144583	MARCH4	1.32905	9.29323e-07	3.36649e-06
ENSG00000141028	CDRT15P1	1.3289	0.00559727	0.0130417
ENSG00000120709	FAM53C	1.32775	6.39526e-164	2.22446e-161
ENSG00000198125	MB	1.32715	0.00336926	0.00815611
ENSG00000169220	RGS14	1.32363	1.19917e-09	5.48961e-09
ENSG00000137752	CASP1	1.32341	0.000232694	0.000656723
ENSG00000124467	PSG8	1.32248	0.0126402	0.0276093
ENSG00000214514	KRT42P	1.32222	0.000123873	0.000361214
ENSG00000091592	NLRP1	1.32192	4.05214e-37	7.21751e-36
ENSG00000253882	RP11-61L23.2	1.3206	1.40238e-08	5.95553e-08
ENSG00000263142	LRRC37A17P	1.3184	2.26099e-15	1.48332e-14
ENSG00000143119	CD53	1.31632	0.00579499	0.0134581
ENSG00000179715	PCED1B	1.31611	1.47459e-08	6.25064e-08
ENSG00000169247	SH3TC2	1.31158	1.35298e-11	7.14061e-11
ENSG00000135148	TRAFD1	1.30405	3.98552e-86	3.33969e-84
ENSG00000132003	ZSWIM4	1.30358	6.25821e-73	3.63943e-71
ENSG00000178445	GLDC	1.30126	0.00167787	0.00425059
ENSG00000042832	TG	1.30092	0.0115134	0.0253433
ENSG00000143217	NECTIN4	1.29577	2.46843e-06	8.55366e-06
ENSG00000112297	AIM1	1.29523	1.50222e-27	1.82073e-26
ENSG00000180385	EMC3-AS1	1.29261	6.71436e-22	6.14899e-21
ENSG00000053918	KCNQ1	1.28714	1.38973e-10	6.81916e-10
ENSG00000131620	ANO1	1.28691	0.00581849	0.0135025
ENSG00000180509	KCNE1	1.28655	0.00216188	0.00538425
ENSG00000119782	FKBP1B	1.28633	7.03424e-05	0.000210274
ENSG00000070182	SPTB	1.28578	4.35238e-05	0.000133349
ENSG00000261905	ABC13-48559800H2.1	1.28477	0.00279302	0.00685062
ENSG00000204767	FAM196B	1.28335	5.12979e-27	6.08543e-26
ENSG00000144655	CSRNP1	1.28281	1.54564e-66	7.53804e-65
ENSG00000154678	PDE1C	1.28271	5.84068e-13	3.33559e-12
ENSG00000229859	PGA3	1.28096	0.00754198	0.017165
ENSG00000156804	FBXO32	1.27982	1.09631e-66	5.37514e-65
ENSG00000260103	RP11-10O17.1	1.27927	1.17445e-10	5.78904e-10
ENSG00000176102	CSTF3	1.27855	2.49226e-132	4.994e-130
ENSG00000185518	SV2B	1.2747	8.00317e-14	4.79176e-13
ENSG00000283382	AC023908.1	1.27452	0.00065216	0.00174442
ENSG00000256683	ZNF350	1.27305	6.76117e-16	4.56064e-15
ENSG00000142182	DNMT3L	1.26835	0.00420856	0.0100239
ENSG00000110723	EXPH5	1.26665	5.64815e-09	2.4627e-08
ENSG00000158023	WDR66	1.26597	1.76425e-16	1.23057e-15
ENSG00000167105	TMEM92	1.26402	2.89176e-06	9.96627e-06
ENSG00000213689	TREX1	1.2631	2.71731e-33	4.1606e-32
ENSG00000186480	INSIG1	1.26286	2.92462e-95	2.93019e-93
ENSG00000185133	INPP5J	1.2623	2.11157e-14	1.31067e-13
ENSG00000138823	MTTP	1.25711	0.00496132	0.0116705
ENSG00000184988	TMEM106A	1.25538	6.36216e-12	3.42442e-11
ENSG00000175213	ZNF408	1.25486	7.45179e-33	1.11686e-31
ENSG00000259040	BLOC1S5-TXNDC5	1.25381	0.00873936	0.0196548
ENSG00000070729	CNGB1	1.24937	0.00762233	0.0173307
ENSG00000181192	DHTKD1	1.24911	1.38892e-54	4.77702e-53
ENSG00000077454	LRCH4	1.24905	6.5542e-39	1.26124e-37
ENSG00000026652	AGPAT4	1.24886	7.30884e-24	7.44e-23
ENSG00000003400	CASP10	1.24831	5.01776e-12	2.72146e-11
ENSG00000204920	ZNF155	1.24754	1.10239e-14	6.95499e-14
ENSG00000162775	RBM15	1.24462	4.9154e-62	2.12214e-60
ENSG00000188997	KCTD21	1.24354	1.02366e-36	1.79725e-35
ENSG00000182902	SLC25A18	1.24181	0.0013461	0.00345665
ENSG00000189280	GJB5	1.24069	0.00189579	0.00476041
ENSG00000134070	IRAK2	1.23877	1.96206e-21	1.75841e-20
ENSG00000070759	TESK2	1.2371	1.4463e-05	4.65234e-05
ENSG00000091073	DTX2	1.23541	1.88355e-28	2.3718e-27
ENSG00000176531	PHLDB3	1.23439	8.02216e-16	5.39345e-15
ENSG00000185432	METTL7A	1.23435	9.07521e-15	5.75711e-14
ENSG00000126947	ARMCX1	1.23345	8.73012e-13	4.94287e-12
ENSG00000111653	ING4	1.23321	6.26635e-25	6.75204e-24
ENSG00000166741	NNMT	1.23302	1.27702e-146	3.51372e-144
ENSG00000166192	SENP8	1.23241	1.8532e-07	7.16073e-07
ENSG00000188015	S100A3	1.23213	6.93806e-23	6.66857e-22
ENSG00000116809	ZBTB17	1.23124	3.12773e-41	6.56717e-40
ENSG00000089639	GMIP	1.23078	9.9964e-33	1.48616e-31
ENSG00000175662	TOM1L2	1.23026	1.19978e-95	1.21527e-93
ENSG00000144488	ESPNL	1.22726	1.41745e-07	5.5268e-07
ENSG00000169508	GPR183	1.2267	0.003135	0.00763257
ENSG00000090238	YPEL3	1.22626	4.77945e-05	0.000145515
ENSG00000125319	C17orf53	1.22541	5.19175e-39	1.0043e-37
ENSG00000147606	SLC26A7	1.22422	0.0148009	0.0318681
ENSG00000267497	NFE2L3P1	1.22344	0.00895166	0.0200857
ENSG00000125775	SDCBP2	1.2234	0.00350249	0.00845358
ENSG00000176444	CLK2	1.2218	2.80773e-76	1.82255e-74
ENSG00000150347	ARID5B	1.22154	1.23484e-74	7.58808e-73
ENSG00000185972	CCIN	1.22038	1.67387e-11	8.78138e-11
ENSG00000184574	LPAR5	1.22029	3.08271e-05	9.58182e-05
ENSG00000160678	S100A1	1.22017	0.000548805	0.00148129
ENSG00000054392	HHAT	1.21892	1.70073e-18	1.32291e-17
ENSG00000196652	ZKSCAN5	1.21685	1.84633e-59	7.30409e-58
ENSG00000269693	CTD-2192J16.20	1.21311	4.47709e-05	0.000136922
ENSG00000189298	ZKSCAN3	1.21194	1.09381e-14	6.90326e-14
ENSG00000159164	SV2A	1.21153	3.90806e-14	2.38165e-13
ENSG00000171631	P2RY6	1.20791	4.89485e-05	0.000148856
ENSG00000089723	OTUB2	1.20706	1.52346e-06	5.39783e-06
ENSG00000130517	PGPEP1	1.20628	2.66656e-19	2.15795e-18
ENSG00000173641	HSPB7	1.20555	0.000319056	0.000887549
ENSG00000086544	ITPKC	1.20472	1.99588e-33	3.06618e-32
ENSG00000149809	TM7SF2	1.20297	8.9775e-06	2.94589e-05
ENSG00000112983	BRD8	1.20278	6.06259e-135	1.33052e-132
ENSG00000148143	ZNF462	1.19959	3.18625e-32	4.64704e-31
ENSG00000111863	ADTRP	1.19951	0.000268602	0.000752307
ENSG00000066455	GOLGA5	1.19833	1.09458e-73	6.55146e-72
ENSG00000170075	GPR37L1	1.19792	0.0066514	0.0152739
ENSG00000134376	CRB1	1.19759	8.37095e-21	7.28604e-20
ENSG00000172081	MOB3A	1.19672	2.65871e-32	3.88687e-31
ENSG00000267796	LIN37	1.19662	6.56048e-20	5.46509e-19
ENSG00000175643	RMI2	1.19506	1.05077e-15	7.00828e-15
ENSG00000172432	GTPBP2	1.19455	6.57774e-104	7.77312e-102
ENSG00000164707	SLC13A4	1.1945	0.000432203	0.00118162
ENSG00000163751	CPA3	1.19419	0.0142971	0.0308662
ENSG00000147697	GSDMC	1.19135	0.00341177	0.00824757
ENSG00000185436	IFNLR1	1.19108	9.34608e-07	3.38497e-06
ENSG00000103485	QPRT	1.19101	3.8134e-12	2.08605e-11
ENSG00000105856	HBP1	1.18973	1.72439e-54	5.90875e-53
ENSG00000169962	TAS1R3	1.18973	0.0055932	0.0130338
ENSG00000196754	S100A2	1.18814	9.01947e-44	2.09677e-42
ENSG00000181035	SLC25A42	1.18633	5.05197e-06	1.69703e-05
ENSG00000116604	MEF2D	1.18615	2.45872e-133	5.03627e-131
ENSG00000171872	KLF17	1.18454	0.000420064	0.00114997
ENSG00000139899	CBLN3	1.1843	0.00027832	0.000777869
ENSG00000170965	PLAC1	1.18357	0.000311566	0.000867501
ENSG00000105355	PLIN3	1.18294	2.63822e-66	1.27318e-64
ENSG00000241935	HOGA1	1.18166	0.000673706	0.00179918
ENSG00000102385	DRP2	1.18123	0.000201568	0.000573143
ENSG00000111679	PTPN6	1.18121	1.94295e-05	6.16387e-05
ENSG00000146112	PPP1R18	1.18119	1.49524e-147	4.24074e-145
ENSG00000159885	ZNF222	1.17843	2.84832e-09	1.26863e-08
ENSG00000227234	SPANXB1	1.17728	0.00993947	0.022127
ENSG00000137171	KLC4	1.17673	1.63874e-31	2.33464e-30
ENSG00000154803	FLCN	1.17535	2.40091e-52	7.7379e-51
ENSG00000204529	GUCY2EP	1.17479	0.000129106	0.000375701
ENSG00000183778	B3GALT5	1.1743	0.00246886	0.00610018
ENSG00000134339	SAA2	1.17423	0.0115516	0.0254181
ENSG00000100739	BDKRB1	1.17376	6.77106e-14	4.06992e-13
ENSG00000196182	STK40	1.17359	4.33629e-45	1.06303e-43
ENSG00000197748	CFAP43	1.17294	0.0154119	0.0330563
ENSG00000118369	USP35	1.17134	3.64043e-29	4.7395e-28
ENSG00000185666	SYN3	1.17099	0.0123575	0.0270334
ENSG00000204305	AGER	1.17048	5.07616e-08	2.05668e-07
ENSG00000163879	DNALI1	1.1699	0.00421698	0.0100413
ENSG00000166484	MAPK7	1.16973	8.51946e-41	1.75482e-39
ENSG00000105808	RASA4	1.16881	4.34341e-21	3.85141e-20
ENSG00000115998	C2orf42	1.16801	1.78902e-17	1.31554e-16
ENSG00000153294	ADGRF4	1.16743	0.000132139	0.000384044
ENSG00000142621	FHAD1	1.16738	0.0101212	0.0225004
ENSG00000178385	PLEKHM3	1.16726	6.79195e-47	1.77602e-45
ENSG00000136881	BAAT	1.16598	0.0117769	0.0258769
ENSG00000283511	RP11-456N14.6	1.16591	0.00292334	0.0071541
ENSG00000162618	ADGRL4	1.16555	0.01049	0.0232656
ENSG00000164741	DLC1	1.16503	0.00067405	0.00179984
ENSG00000167578	RAB4B	1.16422	5.82421e-08	2.34687e-07
ENSG00000065491	TBC1D22B	1.164	2.38341e-40	4.81779e-39
ENSG00000182578	CSF1R	1.16348	0.00694689	0.0159009
ENSG00000132535	DLG4	1.16092	3.66487e-33	5.58363e-32
ENSG00000060718	COL11A1	1.1605	0.00802639	0.0181755
ENSG00000171931	FBXW10	1.15792	2.03428e-05	6.44031e-05
ENSG00000143847	PPFIA4	1.15653	0.0132579	0.0288388
ENSG00000213144	RP11-64B16.2	1.15591	3.92888e-06	1.33436e-05
ENSG00000234969	RP13-33H18.1	1.15579	0.0101522	0.0225624
ENSG00000117305	HMGCL	1.1544	4.53645e-29	5.88525e-28
ENSG00000105327	BBC3	1.1536	2.04895e-06	7.16337e-06
ENSG00000047617	ANO2	1.15325	4.2743e-07	1.59475e-06
ENSG00000163435	ELF3	1.15189	8.37183e-56	3.00262e-54
ENSG00000144229	THSD7B	1.15025	0.0131461	0.0286125
ENSG00000130518	KIAA1683	1.1481	0.00156458	0.00398056
ENSG00000101076	HNF4A	1.14809	0.00864536	0.0194576
ENSG00000198182	ZNF607	1.14755	1.5001e-19	1.22636e-18
ENSG00000100354	TNRC6B	1.14659	1.19634e-73	7.13737e-72
ENSG00000223741	PSMD4P1	1.14561	0.0108553	0.0240063
ENSG00000115459	ELMOD3	1.14525	6.4698e-20	5.39199e-19
ENSG00000084636	COL16A1	1.14292	5.78997e-67	2.87704e-65
ENSG00000163312	HELQ	1.13971	3.23875e-23	3.17756e-22
ENSG00000185038	MROH2A	1.13887	0.0122343	0.0267988
ENSG00000185453	C19orf68	1.13834	1.65818e-22	1.56842e-21
ENSG00000064205	WISP2	1.13663	1.30536e-115	2.02221e-113
ENSG00000197302	ZNF720	1.13597	3.8888e-21	3.45494e-20
ENSG00000204315	FKBPL	1.13582	6.17574e-21	5.42917e-20
ENSG00000111727	HCFC2	1.13299	4.16433e-23	4.06834e-22
ENSG00000221826	PSG3	1.13265	0.015187	0.0326194
ENSG00000162236	STX5	1.13197	2.19039e-47	5.85215e-46
ENSG00000136044	APPL2	1.12859	1.39651e-40	2.8447e-39
ENSG00000183340	JRKL	1.12738	1.36883e-29	1.80374e-28
ENSG00000006534	ALDH3B1	1.12476	6.36526e-107	8.09266e-105
ENSG00000188293	IGFL1	1.12447	5.48617e-05	0.000165935
ENSG00000175592	FOSL1	1.12302	1.40054e-98	1.51876e-96
ENSG00000175018	TEX36	1.12259	0.00258144	0.00636216
ENSG00000111540	RAB5B	1.12232	7.34813e-141	1.83058e-138
ENSG00000178860	MSC	1.12082	0.0161064	0.0344137
ENSG00000162526	TSSK3	1.11983	0.000171715	0.000491854
ENSG00000250645	CTD-2228K2.1	1.11917	0.0143114	0.0308935
ENSG00000197483	ZNF628	1.11766	6.88686e-08	2.75879e-07
ENSG00000164877	MICALL2	1.1167	5.76833e-22	5.31695e-21
ENSG00000166272	WBP1L	1.11576	4.36365e-78	3.01288e-76
ENSG00000171992	SYNPO	1.11384	1.16588e-114	1.76173e-112
ENSG00000135835	KIAA1614	1.11377	2.12215e-06	7.41224e-06
ENSG00000188549	C15orf52	1.11332	2.58922e-83	2.03984e-81
ENSG00000049192	ADAMTS6	1.11257	1.42445e-32	2.10922e-31
ENSG00000140543	DET1	1.11199	4.11538e-14	2.50386e-13
ENSG00000130772	MED18	1.11166	1.90657e-23	1.8968e-22
ENSG00000241352	RP11-392P7.1	1.11091	0.0148633	0.0319987
ENSG00000204344	STK19	1.10942	2.38777e-23	2.36659e-22
ENSG00000180353	HCLS1	1.10794	0.0137429	0.0297849
ENSG00000161642	ZNF385A	1.10768	6.92901e-21	6.06823e-20
ENSG00000185513	L3MBTL1	1.10722	3.79425e-10	1.79998e-09
ENSG00000171169	NAIF1	1.10632	9.24011e-27	1.08222e-25
ENSG00000186814	ZSCAN30	1.10415	5.56463e-18	4.18539e-17
ENSG00000088726	TMEM40	1.10241	0.0125414	0.0274065
ENSG00000180938	ZNF572	1.10179	0.000375602	0.00103408
ENSG00000204248	COL11A2	1.1013	0.00186653	0.00469114
ENSG00000067798	NAV3	1.10083	2.26142e-32	3.32451e-31
ENSG00000170464	DNAJC18	1.09976	8.5267e-20	7.04571e-19
ENSG00000165699	TSC1	1.09973	1.23862e-69	6.56149e-68
ENSG00000183856	IQGAP3	1.09932	9.30268e-109	1.22496e-106
ENSG00000257315	ZBED6	1.09906	6.73266e-41	1.40245e-39
ENSG00000167103	PIP5KL1	1.09878	0.00225328	0.00560281
ENSG00000121903	ZSCAN20	1.0984	1.86207e-16	1.29683e-15
ENSG00000182796	TMEM198B	1.09824	7.00351e-11	3.49891e-10
ENSG00000175182	FAM131A	1.09683	3.38925e-17	2.45505e-16
ENSG00000181031	RPH3AL	1.0955	3.41021e-08	1.40266e-07
ENSG00000145040	UCN2	1.09543	9.17176e-24	9.27999e-23
ENSG00000221963	APOL6	1.09543	9.39433e-17	6.6202e-16
ENSG00000136807	CDK9	1.09484	8.73731e-89	7.9346e-87
ENSG00000049759	NEDD4L	1.09222	4.25323e-71	2.3546e-69
ENSG00000105963	ADAP1	1.08989	4.01526e-05	0.000123328
ENSG00000160224	AIRE	1.08915	0.0171127	0.036412
ENSG00000083067	TRPM3	1.08744	1.12578e-05	3.65834e-05
ENSG00000024862	CCDC28A	1.08733	4.72037e-15	3.03417e-14
ENSG00000006837	CDKL3	1.08641	8.26958e-05	0.00024557
ENSG00000256514	AP003419.11	1.08528	4.5799e-10	2.16322e-09
ENSG00000025293	PHF20	1.08447	9.07306e-109	1.20332e-106
ENSG00000185278	ZBTB37	1.08362	4.29636e-24	4.43966e-23
ENSG00000111077	TNS2	1.08315	7.56144e-33	1.13145e-31
ENSG00000158402	CDC25C	1.08155	1.87635e-35	3.08019e-34
ENSG00000235374	SSR4P1	1.07936	0.000107779	0.000316547
ENSG00000205898	RP11-3B12.4	1.07882	0.0163163	0.0348299
ENSG00000186577	C6orf1	1.07745	1.74303e-10	8.48724e-10
ENSG00000110031	LPXN	1.07567	0.000148736	0.000429301
ENSG00000204138	PHACTR4	1.0755	3.89504e-129	7.32706e-127
ENSG00000168140	VASN	1.07548	5.70989e-15	3.65619e-14
ENSG00000163545	NUAK2	1.07499	5.40178e-20	4.51824e-19
ENSG00000120049	KCNIP2	1.07334	0.00375904	0.00902786
ENSG00000165757	KIAA1462	1.07169	0.0145232	0.031325
ENSG00000149548	CCDC15	1.07156	6.9373e-07	2.54e-06
ENSG00000183876	ARSI	1.07131	6.06191e-08	2.43999e-07
ENSG00000079931	MOXD1	1.07063	0.018035	0.0382375
ENSG00000123444	KBTBD4	1.07017	2.32908e-50	7.08526e-49
ENSG00000153930	ANKFN1	1.06929	1.93135e-06	6.7702e-06
ENSG00000233902	XXbac-BPG181B23.6	1.06895	0.00036116	0.000997152
ENSG00000143622	RIT1	1.06892	3.25943e-45	8.0331e-44
ENSG00000173727	CMB9-22P13.1	1.06885	2.47543e-10	1.1915e-09
ENSG00000257150	PGAM1P5	1.06884	0.0133138	0.0289433
ENSG00000131746	TNS4	1.06776	1.646e-217	1.21376e-214
ENSG00000131069	ACSS2	1.06646	6.73341e-26	7.59672e-25
ENSG00000137496	IL18BP	1.06643	4.23789e-14	2.5767e-13
ENSG00000197245	FAM110D	1.06616	0.0168747	0.0359594
ENSG00000109846	CRYAB	1.06605	1.90627e-37	3.45207e-36
ENSG00000196663	TECPR2	1.066	1.09708e-34	1.76789e-33
ENSG00000131848	ZSCAN5A	1.06448	8.87587e-12	4.73046e-11
ENSG00000185291	IL3RA	1.06402	0.00885469	0.0198923
ENSG00000069399	BCL3	1.06324	8.63042e-46	2.17649e-44
ENSG00000130783	CCDC62	1.06234	0.00731125	0.0166769
ENSG00000213347	MXD3	1.06229	8.95499e-16	6.01184e-15
ENSG00000204514	ZNF814	1.06225	9.00019e-10	4.16462e-09
ENSG00000164125	FAM198B	1.06072	0.011298	0.0249107
ENSG00000134574	DDB2	1.0603	2.88511e-81	2.12748e-79
ENSG00000110921	MVK	1.05918	1.21158e-19	9.93133e-19
ENSG00000126603	GLIS2	1.05852	4.91344e-55	1.71552e-53
ENSG00000104321	TRPA1	1.05806	0.000765615	0.00203285
ENSG00000257390	RP11-762I7.5	1.05676	0.00380312	0.00912422
ENSG00000132793	LPIN3	1.05638	2.9262e-29	3.82044e-28
ENSG00000124209	RAB22A	1.05313	1.09554e-70	5.99294e-69
ENSG00000121289	CEP89	1.0531	3.08754e-54	1.05405e-52
ENSG00000070540	WIPI1	1.05193	5.12611e-11	2.59544e-10
ENSG00000220378	KRT8P42	1.05088	0.00742977	0.0169313
ENSG00000243970	PPIEL	1.04865	0.0022144	0.0055091
ENSG00000170653	ATF7	1.04703	8.4606e-98	9.01567e-96
ENSG00000119917	IFIT3	1.04665	2.492e-24	2.60578e-23
ENSG00000197444	OGDHL	1.04556	0.0178729	0.0379068
ENSG00000145536	ADAMTS16	1.04479	1.74263e-19	1.42085e-18
ENSG00000104081	BMF	1.04467	9.43797e-33	1.40654e-31
ENSG00000267740	AC024592.12	1.04455	0.00519345	0.01217
ENSG00000140451	PIF1	1.04417	5.71073e-34	9.00576e-33
ENSG00000064989	CALCRL	1.04407	0.0129506	0.0282137
ENSG00000139194	RBP5	1.04278	6.36665e-05	0.000191031
ENSG00000104880	ARHGEF18	1.0414	1.58163e-48	4.49959e-47
ENSG00000023839	ABCC2	1.04037	0.000386656	0.00106324
ENSG00000261371	PECAM1	1.03987	0.00171429	0.00433691
ENSG00000166225	FRS2	1.03863	1.79242e-47	4.83089e-46
ENSG00000159314	ARHGAP27	1.03757	3.98593e-15	2.57646e-14
ENSG00000073331	ALPK1	1.03751	2.00729e-10	9.73799e-10
ENSG00000197279	ZNF165	1.03668	5.17016e-05	0.000156724
ENSG00000257704	INAFM1	1.03582	7.54408e-06	2.49328e-05
ENSG00000204256	BRD2	1.03509	5.12408e-226	4.49821e-223
ENSG00000245680	ZNF585B	1.03466	1.44553e-16	1.01286e-15
ENSG00000188897	CTD-3088G3.8	1.03204	0.0112401	0.0247978
ENSG00000056097	ZFR	1.03119	4.41632e-215	3.13134e-212
ENSG00000184154	LRTOMT	1.03024	3.05133e-14	1.87504e-13
ENSG00000138375	SMARCAL1	1.02943	1.96445e-38	3.68785e-37
ENSG00000187091	PLCD1	1.02917	2.61416e-07	9.92831e-07
ENSG00000172602	RND1	1.02803	0.00802489	0.0181743
ENSG00000184867	ARMCX2	1.02727	2.34314e-72	1.3541e-70
ENSG00000108669	CYTH1	1.02552	1.29152e-140	3.17455e-138
ENSG00000166922	SCG5	1.02532	1.72119e-07	6.66601e-07
ENSG00000171100	MTM1	1.02482	2.44385e-15	1.60101e-14
ENSG00000185909	KLHDC8B	1.02441	5.96262e-21	5.25434e-20
ENSG00000145879	SPINK7	1.02439	0.0172687	0.03671
ENSG00000163362	C1orf106	1.02387	2.46785e-10	1.18848e-09
ENSG00000135373	EHF	1.0235	0.0121526	0.0266294
ENSG00000198742	SMURF1	1.02176	2.09382e-70	1.13195e-68
ENSG00000172057	ORMDL3	1.02148	3.67152e-35	5.98447e-34
ENSG00000213462	ERV3-1	1.01991	0.000358364	0.000990174
ENSG00000108840	HDAC5	1.01981	2.18235e-32	3.21338e-31
ENSG00000138764	CCNG2	1.0192	1.15552e-15	7.68745e-15
ENSG00000143409	FAM63A	1.01857	8.64809e-13	4.89793e-12
ENSG00000148339	SLC25A25	1.01716	3.02132e-69	1.58233e-67
ENSG00000103647	CORO2B	1.01664	0.00214857	0.00535182
ENSG00000185739	SRL	1.01314	0.0161957	0.0345885
ENSG00000174564	IL20RB	1.01251	1.11813e-18	8.77511e-18
ENSG00000162227	TAF6L	1.01135	2.39855e-24	2.5095e-23
ENSG00000110844	PRPF40B	1.0106	6.99294e-12	3.75298e-11
ENSG00000144218	AFF3	1.00975	0.000141399	0.000409212
ENSG00000121236	TRIM6	1.00771	1.27489e-10	6.27405e-10
ENSG00000149182	ARFGAP2	1.00696	1.32755e-133	2.78106e-131
ENSG00000165698	SPACA9	1.00637	1.48434e-05	4.76556e-05
ENSG00000164406	LEAP2	1.00584	0.000603912	0.00162031
ENSG00000166783	KIAA0430	1.00538	1.02254e-61	4.32351e-60
ENSG00000047936	ROS1	1.00524	8.06816e-14	4.82911e-13
ENSG00000282246	RP11-295P9.13	1.00491	0.000210844	0.000597895
ENSG00000139155	SLCO1C1	1.00431	3.54897e-05	0.000109553
ENSG00000156973	PDE6D	1.00334	6.55069e-14	3.94132e-13
ENSG00000187556	NANOS3	1.00323	0.0142016	0.030678
ENSG00000123411	IKZF4	1.00188	3.68368e-12	2.01689e-11
ENSG00000126583	PRKCG	1.00078	0.0164577	0.0351073
ENSG00000181722	ZBTB20	1.00052	7.77553e-20	6.45393e-19
ENSG00000198520	C1orf228	1.00024	0.0167882	0.0357875
ENSG00000158480	SPATA2	0.999945	1.47406e-20	1.26805e-19
ENSG00000197410	DCHS2	0.999461	0.00942952	0.0210707
ENSG00000143341	HMCN1	0.998423	0.000113311	0.000332257
ENSG00000118898	PPL	0.998027	1.33735e-79	9.59305e-78
ENSG00000274583	FAM74A4	0.997414	0.019236	0.0405924
ENSG00000171951	SCG2	0.997284	2.61047e-06	9.02552e-06
ENSG00000187800	PEAR1	0.996453	1.96164e-13	1.14766e-12
ENSG00000177692	DNAJC28	0.996078	0.0153799	0.0329996
ENSG00000259823	LYPD8	0.996018	0.0151601	0.0325691
ENSG00000053438	NNAT	0.995481	0.00399282	0.00954704
ENSG00000118298	CA14	0.995239	0.0100043	0.0222633
ENSG00000167565	SERTAD3	0.994943	1.10406e-14	6.96314e-14
ENSG00000162300	ZFPL1	0.994798	4.06382e-24	4.20643e-23
ENSG00000159200	RCAN1	0.994114	1.64876e-53	5.53642e-52
ENSG00000204396	VWA7	0.993976	9.4204e-09	4.0472e-08
ENSG00000160766	GBAP1	0.993658	9.93134e-16	6.6407e-15
ENSG00000274641	HIST1H2BO	0.993117	0.0113595	0.0250314
ENSG00000164309	CMYA5	0.993053	9.21701e-05	0.000272913
ENSG00000064547	LPAR2	0.992464	1.75523e-05	5.59626e-05
ENSG00000196196	HRCT1	0.992125	4.14329e-18	3.13811e-17
ENSG00000164318	EGFLAM	0.990102	3.72849e-09	1.64595e-08
ENSG00000011021	CLCN6	0.988581	3.55977e-30	4.79359e-29
ENSG00000196220	SRGAP3	0.988016	0.000377936	0.00104035
ENSG00000096070	BRPF3	0.986928	6.47475e-53	2.12388e-51
ENSG00000165923	AGBL2	0.986147	0.0107649	0.0238208
ENSG00000198774	RASSF9	0.984855	3.12468e-07	1.17798e-06
ENSG00000163617	CCDC191	0.979901	0.0080624	0.0182503
ENSG00000185686	PRAME	0.979811	4.49488e-82	3.39603e-80
ENSG00000198551	ZNF627	0.979488	2.95322e-10	1.41372e-09
ENSG00000172183	ISG20	0.979127	0.000433907	0.00118593
ENSG00000166987	MBD6	0.97836	3.63065e-47	9.56157e-46
ENSG00000271741	RP11-244H3.4	0.977695	7.47928e-07	2.72923e-06
ENSG00000101197	BIRC7	0.976559	0.0204792	0.042965
ENSG00000239704	CDRT4	0.975706	0.0182824	0.0387087
ENSG00000106351	AGFG2	0.9753	5.80708e-27	6.87563e-26
ENSG00000008256	CYTH3	0.975272	7.75744e-82	5.80319e-80
ENSG00000197019	SERTAD1	0.975019	8.33736e-13	4.7292e-12
ENSG00000184619	KRBA2	0.974449	0.000373735	0.00102971
ENSG00000030110	BAK1	0.974342	1.90484e-47	5.11891e-46
ENSG00000257800	FNBP1P1	0.972462	0.00183057	0.00460767
ENSG00000283189	RP11-949J7.8	0.972158	2.05023e-05	6.48747e-05
ENSG00000134668	SPOCD1	0.971379	8.01721e-38	1.47208e-36
ENSG00000160229	ZNF66	0.970617	0.00459368	0.0108681
ENSG00000167232	ZNF91	0.970018	2.41304e-12	1.33546e-11
ENSG00000268357	VN1R81P	0.96956	0.00405239	0.00967693
ENSG00000070915	SLC12A3	0.968916	1.54784e-09	7.02471e-09
ENSG00000088826	SMOX	0.968639	1.46822e-05	4.71626e-05
ENSG00000109079	TNFAIP1	0.968348	9.61828e-100	1.07462e-97
ENSG00000044090	CUL7	0.968136	5.30253e-30	7.08863e-29
ENSG00000017427	IGF1	0.968103	3.00641e-09	1.33582e-08
ENSG00000105514	RAB3D	0.967863	7.87763e-19	6.24083e-18
ENSG00000174951	FUT1	0.967841	0.00170654	0.00431906
ENSG00000236104	ZBTB22	0.967713	3.52949e-13	2.0365e-12
ENSG00000173812	EIF1	0.966683	8.15454e-143	2.11731e-140
ENSG00000130150	MOSPD2	0.966514	6.27912e-31	8.7231e-30
ENSG00000162601	MYSM1	0.966484	8.20779e-23	7.86437e-22
ENSG00000143079	CTTNBP2NL	0.966297	1.42688e-57	5.32479e-56
ENSG00000241322	CDRT1	0.966045	6.76253e-09	2.93266e-08
ENSG00000167182	SP2	0.965872	4.58497e-38	8.50341e-37
ENSG00000158859	ADAMTS4	0.965523	0.000419162	0.00114811
ENSG00000083799	CYLD	0.964813	1.29147e-46	3.34385e-45
ENSG00000188786	MTF1	0.963997	1.06343e-46	2.76897e-45
ENSG00000116885	OSCP1	0.963776	9.44921e-07	3.42031e-06
ENSG00000163155	LYSMD1	0.963607	1.45943e-17	1.07662e-16
ENSG00000138621	PPCDC	0.963106	4.34942e-22	4.03328e-21
ENSG00000256294	ZNF225	0.961974	4.51056e-08	1.83721e-07
ENSG00000105483	CARD8	0.961733	5.37016e-16	3.65175e-15
ENSG00000166396	SERPINB7	0.960716	0.000797429	0.00211064
ENSG00000183023	SLC8A1	0.959818	0.0202577	0.0425391
ENSG00000143416	SELENBP1	0.959314	1.76285e-41	3.74402e-40
ENSG00000152439	ZNF773	0.958789	0.0138469	0.029975
ENSG00000132017	DCAF15	0.95861	1.75263e-28	2.21148e-27
ENSG00000110046	ATG2A	0.958506	4.36362e-31	6.10344e-30
ENSG00000182372	CLN8	0.958415	1.18714e-22	1.13159e-21
ENSG00000027075	PRKCH	0.958378	8.47078e-08	3.36187e-07
ENSG00000164520	RAET1E	0.958334	4.21273e-24	4.35567e-23
ENSG00000213983	AP1G2	0.958236	2.23219e-31	3.15329e-30
ENSG00000204569	PPP1R10	0.957981	8.88083e-76	5.74449e-74
ENSG00000142910	TINAGL1	0.957193	2.02104e-60	8.24287e-59
ENSG00000147883	CDKN2B	0.95381	6.23827e-131	1.18559e-128
ENSG00000165434	PGM2L1	0.952444	9.92733e-20	8.17375e-19
ENSG00000177873	ZNF619	0.951943	1.14692e-09	5.2635e-09
ENSG00000163877	SNIP1	0.95105	2.88345e-29	3.76728e-28
ENSG00000179943	FIZ1	0.950342	3.15321e-18	2.41001e-17
ENSG00000187186	RP11-195F19.5	0.950325	6.13368e-08	2.46672e-07
ENSG00000134690	CDCA8	0.94987	3.30747e-87	2.87609e-85
ENSG00000110628	SLC22A18	0.948765	3.96034e-05	0.000121742
ENSG00000168591	TMUB2	0.94859	9.90106e-38	1.80898e-36
ENSG00000149679	CABLES2	0.948448	2.17435e-07	8.32832e-07
ENSG00000104497	SNX16	0.948304	2.20341e-06	7.68151e-06
ENSG00000137413	TAF8	0.946122	1.46533e-25	1.62339e-24
ENSG00000117226	GBP3	0.945506	1.11351e-11	5.90044e-11
ENSG00000213413	PVRIG	0.945358	0.0105551	0.0233988
ENSG00000135114	OASL	0.94456	5.64839e-20	4.71808e-19
ENSG00000181450	ZNF678	0.943851	1.30464e-13	7.72105e-13
ENSG00000138356	AOX1	0.943764	1.02412e-40	2.09559e-39
ENSG00000226314	ZNF192P1	0.942979	0.0106991	0.023698
ENSG00000165084	C8orf34	0.942585	0.0176708	0.0375214
ENSG00000213809	KLRK1	0.942478	0.0103184	0.022907
ENSG00000242221	PSG2	0.941824	0.0130391	0.0283965
ENSG00000181004	BBS12	0.941793	1.90495e-07	7.3468e-07
ENSG00000146856	AGBL3	0.941682	0.00234847	0.00582614
ENSG00000085831	TTC39A	0.940574	0.00602071	0.0139367
ENSG00000172828	CES3	0.94022	0.000474526	0.00129006
ENSG00000198169	ZNF251	0.939835	1.01396e-15	6.77504e-15
ENSG00000218891	ZNF579	0.939803	3.10385e-11	1.59786e-10
ENSG00000002746	HECW1	0.935772	6.92321e-07	2.53635e-06
ENSG00000173801	JUP	0.93208	1.46929e-75	9.43775e-74
ENSG00000136235	GPNMB	0.930488	3.59641e-10	1.71096e-09
ENSG00000167595	PROSER3	0.929872	3.26905e-19	2.63857e-18
ENSG00000180340	FZD2	0.927933	6.24604e-15	3.99333e-14
ENSG00000204174	NPY4R	0.927825	3.89686e-05	0.000119831
ENSG00000163993	S100P	0.927808	1.30066e-05	4.2044e-05
ENSG00000117020	AKT3	0.927745	0.00539443	0.0126057
ENSG00000178184	PARD6G	0.927701	4.04586e-06	1.37232e-05
ENSG00000156650	KAT6B	0.927523	3.1007e-42	6.77268e-41
ENSG00000131095	GFAP	0.927318	0.0222168	0.0463415
ENSG00000003756	RBM5	0.926243	1.44193e-63	6.42075e-62
ENSG00000204386	NEU1	0.923699	7.74898e-39	1.48495e-37
ENSG00000170540	ARL6IP1	0.923034	3.48205e-140	8.33657e-138
ENSG00000204304	PBX2	0.922701	2.49167e-50	7.56737e-49
ENSG00000076067	RBMS2	0.920667	4.3446e-62	1.88011e-60
ENSG00000080031	PTPRH	0.920351	0.017505	0.0371907
ENSG00000153714	LURAP1L	0.919387	5.23834e-23	5.08257e-22
ENSG00000213085	CFAP45	0.918946	0.00107613	0.00279552
ENSG00000111252	SH2B3	0.918581	3.81696e-15	2.46983e-14
ENSG00000136531	SCN2A	0.918447	0.00995009	0.0221454
ENSG00000133466	C1QTNF6	0.918307	4.57075e-15	2.94313e-14
ENSG00000166925	TSC22D4	0.916957	3.62197e-28	4.51155e-27
ENSG00000172296	SPTLC3	0.916727	2.79137e-06	9.62929e-06
ENSG00000159166	LAD1	0.916266	0.0194742	0.0410481
ENSG00000168517	HEXIM2	0.916184	5.2561e-11	2.65906e-10
ENSG00000150722	PPP1R1C	0.915927	0.00431557	0.0102549
ENSG00000130479	MAP1S	0.914192	1.68836e-20	1.44834e-19
ENSG00000125864	BFSP1	0.913314	0.00855624	0.0192735
ENSG00000171346	KRT15	0.910801	0.000445351	0.0012154
ENSG00000182504	CEP97	0.91018	2.97809e-26	3.41001e-25
ENSG00000197128	ZNF772	0.909875	1.98381e-05	6.28485e-05
ENSG00000140199	SLC12A6	0.909541	9.21286e-31	1.26746e-29
ENSG00000130202	NECTIN2	0.909481	6.30512e-42	1.36106e-40
ENSG00000143365	RORC	0.908891	0.0063172	0.0145608
ENSG00000198026	ZNF335	0.908692	4.73341e-44	1.11586e-42
ENSG00000081237	PTPRC	0.908337	0.0129083	0.0281349
ENSG00000204406	MBD5	0.908223	2.87708e-23	2.83536e-22
ENSG00000105325	FZR1	0.907036	5.95353e-30	7.94163e-29
ENSG00000000457	SCYL3	0.906516	6.23278e-11	3.13253e-10
ENSG00000172977	KAT5	0.906338	6.66475e-44	1.56316e-42
ENSG00000142867	BCL10	0.906133	4.05823e-20	3.40992e-19
ENSG00000132256	TRIM5	0.905954	3.90019e-21	3.46339e-20
ENSG00000181513	ACBD4	0.905654	4.22223e-08	1.72358e-07
ENSG00000244731	C4A	0.905593	0.000461724	0.00125711
ENSG00000123815	COQ8B	0.904687	5.82229e-26	6.6011e-25
ENSG00000130589	HELZ2	0.903857	2.15531e-11	1.11956e-10
ENSG00000150471	ADGRL3	0.903462	0.0159929	0.034199
ENSG00000117758	STX12	0.902703	4.45381e-25	4.8383e-24
ENSG00000121621	KIF18A	0.90268	3.29334e-48	9.2409e-47
ENSG00000117016	RIMS3	0.902244	0.0154777	0.0331742
ENSG00000109066	TMEM104	0.901682	1.87223e-28	2.35916e-27
ENSG00000128016	ZFP36	0.900379	1.72005e-16	1.20065e-15
ENSG00000234338	RP11-797H7.1	0.900281	0.0224903	0.0468697
ENSG00000151065	DCP1B	0.899395	2.35322e-12	1.30314e-11
ENSG00000184313	MROH7	0.898796	0.0220788	0.0460746
ENSG00000132749	TESMIN	0.897904	2.00822e-06	7.02495e-06
ENSG00000168952	STXBP6	0.895932	0.00177644	0.00448305
ENSG00000077150	NFKB2	0.894752	1.08599e-46	2.82372e-45
ENSG00000163141	BNIPL	0.893451	0.0117214	0.0257672
ENSG00000119720	NRDE2	0.893271	1.55103e-26	1.80058e-25
ENSG00000103642	LACTB	0.892885	1.68955e-27	2.04376e-26
ENSG00000177169	ULK1	0.892185	1.21546e-27	1.48391e-26
ENSG00000175220	ARHGAP1	0.891248	1.42824e-75	9.20613e-74
ENSG00000007047	MARK4	0.890375	5.19266e-24	5.33594e-23
ENSG00000099812	MISP	0.889938	9.58888e-55	3.32276e-53
ENSG00000146826	C7orf43	0.889752	1.58539e-14	9.91071e-14
ENSG00000136155	SCEL	0.889581	0.0189933	0.0401125
ENSG00000133247	KMT5C	0.88934	2.5029e-09	1.1183e-08
ENSG00000154114	TBCEL	0.88898	9.26797e-14	5.52214e-13
ENSG00000128881	TTBK2	0.888881	8.81413e-30	1.16814e-28
ENSG00000261221	ZNF865	0.888874	3.41347e-14	2.09131e-13
ENSG00000103381	CPPED1	0.888848	6.62587e-21	5.80827e-20
ENSG00000159214	CCDC24	0.887798	7.56605e-05	0.000225441
ENSG00000145020	AMT	0.886093	0.0115564	0.0254198
ENSG00000132109	TRIM21	0.885873	5.90118e-16	3.99663e-15
ENSG00000135482	ZC3H10	0.885394	9.48987e-12	5.04454e-11
ENSG00000189042	ZNF567	0.884458	7.78737e-10	3.61977e-09
ENSG00000100228	RAB36	0.882531	0.00845021	0.0190533
ENSG00000183060	LYSMD4	0.882163	7.66578e-12	4.10333e-11
ENSG00000264127	SCML2P1	0.881478	0.0147582	0.031791
ENSG00000125741	OPA3	0.880088	2.77147e-43	6.29212e-42
ENSG00000136560	TANK	0.879649	6.45888e-22	5.93271e-21
ENSG00000119906	SLF2	0.87715	2.6574e-34	4.22684e-33
ENSG00000124508	BTN2A2	0.876506	1.18085e-14	7.42967e-14
ENSG00000001460	STPG1	0.876106	6.1497e-11	3.09331e-10
ENSG00000132010	ZNF20	0.874997	0.00634745	0.0146233
ENSG00000213654	GPSM3	0.87459	0.00787415	0.0178614
ENSG00000154654	NCAM2	0.87398	3.50468e-09	1.55049e-08
ENSG00000142459	EVI5L	0.873736	1.59198e-06	5.62765e-06
ENSG00000175137	SH3BP5L	0.873622	9.89376e-40	1.95909e-38
ENSG00000109743	BST1	0.873477	0.0064541	0.0148597
ENSG00000134955	SLC37A2	0.873345	0.0032805	0.00795947
ENSG00000150637	CD226	0.87333	0.00718882	0.0164119
ENSG00000187066	TMEM262	0.873186	0.00552522	0.0128852
ENSG00000143369	ECM1	0.873054	3.12555e-09	1.38575e-08
ENSG00000104881	PPP1R13L	0.872794	2.46437e-44	5.87718e-43
ENSG00000120137	PANK3	0.871205	4.99277e-57	1.84084e-55
ENSG00000129657	SEC14L1	0.870613	3.8463e-79	2.71672e-77
ENSG00000143373	ZNF687	0.870057	5.141e-30	6.88267e-29
ENSG00000198542	ITGBL1	0.869247	0.00139364	0.00357079
ENSG00000181896	ZNF101	0.866927	8.746e-15	5.55591e-14
ENSG00000187796	CARD9	0.866849	0.00360636	0.00868381
ENSG00000161800	RACGAP1	0.866094	7.1493e-111	9.98465e-109
ENSG00000125746	EML2	0.866059	7.77829e-21	6.78301e-20
ENSG00000146834	MEPCE	0.865154	6.65832e-51	2.05261e-49
ENSG00000183475	ASB7	0.864971	1.06001e-28	1.35328e-27
ENSG00000181523	SGSH	0.864964	3.87591e-30	5.20411e-29
ENSG00000166529	ZSCAN21	0.864577	2.15149e-14	1.33454e-13
ENSG00000134538	SLCO1B1	0.864341	0.0109081	0.0241059
ENSG00000126391	FRMD8	0.863224	8.75328e-31	1.20603e-29
ENSG00000223703	AC027612.4	0.863063	0.00744467	0.0169624
ENSG00000170537	TMC7	0.862659	8.8467e-11	4.39356e-10
ENSG00000180901	KCTD2	0.861794	2.57104e-33	3.93991e-32
ENSG00000197191	CYSRT1	0.861751	3.62361e-11	1.85714e-10
ENSG00000186364	NUDT17	0.859763	0.00184925	0.00465215
ENSG00000173221	GLRX	0.859567	8.55741e-22	7.79426e-21
ENSG00000120053	GOT1	0.858361	8.2642e-49	2.37306e-47
ENSG00000115282	TTC31	0.858182	3.23044e-23	3.1711e-22
ENSG00000189334	S100A14	0.858123	2.56851e-06	8.88876e-06
ENSG00000111859	NEDD9	0.857951	5.46234e-37	9.67322e-36
ENSG00000198074	AKR1B10	0.857762	0.0086022	0.0193652
ENSG00000125898	FAM110A	0.857398	1.89875e-05	6.02676e-05
ENSG00000204592	HLA-E	0.857204	2.5904e-43	5.89555e-42
ENSG00000278616	BEND3P3	0.856663	4.36501e-05	0.000133714
ENSG00000065325	GLP2R	0.856186	5.859e-70	3.1217e-68
ENSG00000147041	SYTL5	0.855888	4.16733e-08	1.70154e-07
ENSG00000181045	SLC26A11	0.855857	4.03154e-14	2.45366e-13
ENSG00000128284	APOL3	0.855617	0.0034034	0.00822842
ENSG00000101665	SMAD7	0.85524	2.04776e-38	3.83253e-37
ENSG00000198919	DZIP3	0.853496	1.48482e-09	6.74536e-09
ENSG00000163517	HDAC11	0.852764	0.000233388	0.00065848
ENSG00000105227	PRX	0.852193	0.00350109	0.0084513
ENSG00000182185	RAD51B	0.851698	4.74196e-05	0.000144445
ENSG00000151474	FRMD4A	0.851297	0.000201061	0.000572178
ENSG00000132906	CASP9	0.849554	9.04106e-19	7.13188e-18
ENSG00000119397	CNTRL	0.849191	1.89573e-30	2.57348e-29
ENSG00000008323	PLEKHG6	0.84835	0.016604	0.0354071
ENSG00000180667	YOD1	0.846854	5.34864e-50	1.6059e-48
ENSG00000129472	RAB2B	0.844886	2.26515e-17	1.65575e-16
ENSG00000167470	MIDN	0.844557	1.27477e-26	1.48268e-25
ENSG00000155304	HSPA13	0.843247	2.72884e-40	5.49194e-39
ENSG00000166128	RAB8B	0.843142	8.45964e-20	6.99343e-19
ENSG00000204524	ZNF805	0.843071	1.26432e-05	4.09214e-05
ENSG00000146232	NFKBIE	0.842938	1.65262e-07	6.41121e-07
ENSG00000274512	TBC1D3L	0.842662	2.60913e-07	9.91124e-07
ENSG00000149636	DSN1	0.842555	8.44476e-44	1.96813e-42
ENSG00000266074	BAHCC1	0.841672	0.000141426	0.000409227
ENSG00000238072	RP11-305M3.2	0.841645	0.018413	0.0389717
ENSG00000204498	NFKBIL1	0.84164	7.44368e-19	5.90975e-18
ENSG00000184381	PLA2G6	0.84145	0.000591963	0.00159056
ENSG00000110395	CBL	0.841287	1.69981e-48	4.82091e-47
ENSG00000172878	METAP1D	0.840472	9.30492e-15	5.89674e-14
ENSG00000244176	RP11-810P12.1	0.839219	0.0241102	0.0499435
ENSG00000137343	ATAT1	0.838831	6.8797e-11	3.44078e-10
ENSG00000124374	PAIP2B	0.837548	0.00251317	0.00620301
ENSG00000169871	TRIM56	0.837504	8.94244e-45	2.17485e-43
ENSG00000213865	C8orf44	0.836778	0.0019522	0.00489044
ENSG00000141527	CARD14	0.836634	0.000143304	0.000414401
ENSG00000269533	AC003002.6	0.836388	0.0194578	0.0410186
ENSG00000145715	RASA1	0.836278	9.36996e-39	1.7863e-37
ENSG00000173456	RNF26	0.836267	5.23513e-37	9.28871e-36
ENSG00000005469	CROT	0.835941	1.2986e-11	6.85756e-11
ENSG00000156687	UNC5D	0.835596	2.69468e-05	8.43402e-05
ENSG00000163328	GPR155	0.835564	1.58884e-08	6.71639e-08
ENSG00000103145	HCFC1R1	0.835392	4.69028e-32	6.78692e-31
ENSG00000127452	FBXL12	0.835341	2.28552e-13	1.33292e-12
ENSG00000151458	ANKRD50	0.834674	4.87666e-47	1.27701e-45
ENSG00000066135	KDM4A	0.834264	4.45897e-66	2.13509e-64
ENSG00000225932	CTAGE4	0.833373	0.00114524	0.00296232
ENSG00000115363	EVA1A	0.832884	2.50781e-10	1.20583e-09
ENSG00000101306	MYLK2	0.832346	0.00141377	0.00362083
ENSG00000090924	PLEKHG2	0.832138	4.27633e-32	6.20741e-31
ENSG00000133710	SPINK5	0.831789	2.31248e-06	8.04351e-06
ENSG00000256338	RPL41P2	0.83172	0.0167429	0.0356951
ENSG00000144589	STK11IP	0.830599	5.9617e-23	5.75714e-22
ENSG00000129566	TEP1	0.830398	4.83825e-22	4.4686e-21
ENSG00000108176	DNAJC12	0.830278	2.75446e-08	1.14134e-07
ENSG00000188493	C19orf54	0.830221	4.16237e-14	2.53162e-13
ENSG00000134222	PSRC1	0.830131	1.09358e-30	1.49779e-29
ENSG00000112511	PHF1	0.829511	2.77442e-22	2.59495e-21
ENSG00000105321	CCDC9	0.829391	1.2562e-23	1.26339e-22
ENSG00000230358	SPDYE21P	0.829374	0.0187316	0.0395869
ENSG00000167065	DUSP18	0.828837	0.00092551	0.00242838
ENSG00000151148	UBE3B	0.828798	7.10324e-44	1.66389e-42
ENSG00000172992	DCAKD	0.82799	5.30167e-13	3.03529e-12
ENSG00000176024	ZNF613	0.826649	8.24128e-07	3.00016e-06
ENSG00000100106	TRIOBP	0.826202	4.66076e-37	8.29354e-36
ENSG00000175003	SLC22A1	0.825975	0.0178535	0.0378745
ENSG00000116668	SWT1	0.825184	0.000339657	0.000941306
ENSG00000139182	CLSTN3	0.824189	3.61407e-19	2.91195e-18
ENSG00000100867	DHRS2	0.823979	0.0161438	0.0344857
ENSG00000123240	OPTN	0.823979	7.21448e-33	1.08394e-31
ENSG00000124523	SIRT5	0.82389	1.94706e-06	6.82265e-06
ENSG00000138798	EGF	0.823724	0.00920467	0.0205957
ENSG00000166135	HIF1AN	0.823317	8.13086e-44	1.89737e-42
ENSG00000173535	TNFRSF10C	0.82306	0.0182164	0.0385866
ENSG00000204923	FBXO48	0.822796	0.00121986	0.0031465
ENSG00000106804	C5	0.82261	0.0156726	0.0335686
ENSG00000183386	FHL3	0.821807	8.73829e-38	1.6013e-36
ENSG00000178401	DNAJC22	0.821155	0.00561221	0.0130748
ENSG00000188215	DCUN1D3	0.821089	6.59122e-14	3.96441e-13
ENSG00000118473	SGIP1	0.820584	0.00894681	0.0200772
ENSG00000185442	FAM174B	0.820565	0.0113707	0.025053
ENSG00000154263	ABCA10	0.820215	0.00805308	0.0182314
ENSG00000184384	MAML2	0.819341	2.39583e-24	2.50807e-23
ENSG00000099330	OCEL1	0.819083	6.46556e-06	2.14839e-05
ENSG00000137573	SULF1	0.818924	7.91687e-06	2.61087e-05
ENSG00000249947	XBP1P1	0.818828	0.0225093	0.0469039
ENSG00000100360	IFT27	0.818391	0.000309596	0.000862275
ENSG00000129028	THAP10	0.818047	3.7716e-07	1.41291e-06
ENSG00000196954	CASP4	0.816621	4.33048e-14	2.63126e-13
ENSG00000106683	LIMK1	0.816102	2.52552e-47	6.69898e-46
ENSG00000141219	C17orf80	0.816057	1.62119e-30	2.20566e-29
ENSG00000166532	RIMKLB	0.815913	3.96921e-40	7.94489e-39
ENSG00000105245	NUMBL	0.815499	8.23976e-38	1.51144e-36
ENSG00000266714	MYO15B	0.814	4.86712e-08	1.97416e-07
ENSG00000011454	RABGAP1	0.813645	3.67831e-60	1.48705e-58
ENSG00000013364	MVP	0.81293	1.4019e-51	4.41023e-50
ENSG00000112984	KIF20A	0.812867	3.14744e-125	5.57914e-123
ENSG00000160679	CHTOP	0.812742	2.03072e-69	1.07267e-67
ENSG00000181852	RNF41	0.812336	1.92973e-38	3.63006e-37
ENSG00000158769	F11R	0.812146	1.78419e-08	7.50435e-08
ENSG00000141084	RANBP10	0.811896	4.14305e-33	6.28618e-32
ENSG00000100211	CBY1	0.811122	7.16378e-11	3.57704e-10
ENSG00000147437	GNRH1	0.810621	0.00331006	0.00802063
ENSG00000172650	AGAP5	0.809923	0.000211837	0.000600249
ENSG00000162869	PPP1R21	0.808913	5.97906e-12	3.23142e-11
ENSG00000106665	CLIP2	0.807694	5.5522e-09	2.42145e-08
ENSG00000117266	CDK18	0.805639	3.15102e-10	1.50568e-09
ENSG00000099364	FBXL19	0.805571	6.15123e-25	6.63534e-24
ENSG00000138867	GUCD1	0.805253	3.79813e-53	1.25481e-51
ENSG00000130066	SAT1	0.804558	1.4973e-21	1.35175e-20
ENSG00000149489	ROM1	0.804182	3.32069e-06	1.13533e-05
ENSG00000041515	MYO16	0.80367	0.000562447	0.00151545
ENSG00000136378	ADAMTS7	0.802938	0.00134166	0.00344575
ENSG00000251664	PCDHA12	0.801785	0.00338527	0.0081878
ENSG00000067191	CACNB1	0.801669	3.18486e-11	1.63819e-10
ENSG00000182585	EPGN	0.800727	2.28244e-06	7.94652e-06
ENSG00000128422	KRT17	0.800445	1.98452e-113	2.92677e-111
ENSG00000185591	SP1	0.800357	1.81889e-77	1.22825e-75
ENSG00000183963	SMTN	0.799799	9.36708e-29	1.19918e-27
ENSG00000114670	NEK11	0.799464	0.00897829	0.0201381
ENSG00000067365	METTL22	0.79944	5.85375e-14	3.53237e-13
ENSG00000167920	TMEM99	0.798912	4.66608e-15	3.00137e-14
ENSG00000196391	ZNF774	0.798854	3.66693e-09	1.61994e-08
ENSG00000039068	CDH1	0.798617	0.0010762	0.00279552
ENSG00000100968	NFATC4	0.798491	4.91581e-23	4.77214e-22
ENSG00000143643	TTC13	0.798405	1.64508e-24	1.73271e-23
ENSG00000130038	CRACR2A	0.797816	0.0232965	0.0484021
ENSG00000091831	ESR1	0.796348	0.0230068	0.0478324
ENSG00000183287	CCBE1	0.795989	0.00717776	0.0163886
ENSG00000184584	TMEM173	0.795526	6.7574e-24	6.88247e-23
ENSG00000184661	CDCA2	0.795246	1.51471e-44	3.63588e-43
ENSG00000242028	HYPK	0.794287	1.2708e-05	4.11148e-05
ENSG00000143457	GOLPH3L	0.793838	6.05057e-22	5.56876e-21
ENSG00000274847	AC145212.1	0.793471	0.00198703	0.00497236
ENSG00000113742	CPEB4	0.793097	1.99303e-38	3.73769e-37
ENSG00000156675	RAB11FIP1	0.792559	5.24886e-44	1.23265e-42
ENSG00000100330	MTMR3	0.791097	2.32015e-29	3.03778e-28
ENSG00000170631	ZNF16	0.790093	7.93477e-11	3.94704e-10
ENSG00000143390	RFX5	0.78991	4.40552e-69	2.30073e-67
ENSG00000182318	ZSCAN22	0.78988	3.50436e-10	1.66976e-09
ENSG00000197959	DNM3	0.78979	1.19347e-08	5.09415e-08
ENSG00000115525	ST3GAL5	0.788756	0.000130764	0.000380168
ENSG00000129194	SOX15	0.788517	0.0124492	0.0272145
ENSG00000197122	SRC	0.788387	1.61621e-13	9.50696e-13
ENSG00000104946	TBC1D17	0.787995	4.15893e-15	2.6817e-14
ENSG00000149596	JPH2	0.787335	8.25585e-31	1.1392e-29
ENSG00000173875	ZNF791	0.786924	1.25594e-20	1.08294e-19
ENSG00000116701	NCF2	0.786145	1.29482e-15	8.58322e-15
ENSG00000183530	PRR14L	0.78579	3.83418e-40	7.68294e-39
ENSG00000283050	GTF2IP12	0.785758	2.98569e-06	1.0265e-05
ENSG00000105559	PLEKHA4	0.784619	0.000940382	0.00246529
ENSG00000110619	CARS	0.784478	1.17264e-47	3.19316e-46
ENSG00000058673	ZC3H11A	0.783575	1.72374e-81	1.27619e-79
ENSG00000101928	MOSPD1	0.782846	2.99568e-20	2.53793e-19
ENSG00000137878	GCOM1	0.781002	0.000238242	0.000671249
ENSG00000073464	CLCN4	0.780621	4.12593e-17	2.96768e-16
ENSG00000102316	MAGED2	0.779841	4.86985e-63	2.15807e-61
ENSG00000196878	LAMB3	0.779455	1.2846e-46	3.33074e-45
ENSG00000181027	FKRP	0.779066	2.7798e-14	1.71218e-13
ENSG00000143398	PIP5K1A	0.778598	7.3713e-105	8.82403e-103
ENSG00000186704	DTX2P1	0.777896	0.0011993	0.00309564
ENSG00000155111	CDK19	0.777045	7.27517e-16	4.89839e-15
ENSG00000177096	FAM109B	0.776145	9.2359e-20	7.62242e-19
ENSG00000196639	HRH1	0.775708	1.94347e-25	2.14281e-24
ENSG00000197712	FAM114A1	0.774998	1.48508e-31	2.11735e-30
ENSG00000197892	KIF13B	0.77314	5.13212e-07	1.90402e-06
ENSG00000205277	MUC12	0.772322	0.00439654	0.0104365
ENSG00000166887	VPS39	0.771653	6.22657e-52	1.97228e-50
ENSG00000106948	AKNA	0.771234	2.31908e-07	8.84774e-07
ENSG00000230409	TCEA1P2	0.77096	1.69501e-05	5.41269e-05
ENSG00000169136	ATF5	0.770574	1.14088e-18	8.94605e-18
ENSG00000197948	FCHSD1	0.770408	3.45934e-12	1.89857e-11
ENSG00000259529	RP11-468E2.4	0.769808	0.000297473	0.000829514
ENSG00000148082	SHC3	0.769605	0.00269383	0.00662055
ENSG00000165046	LETM2	0.76945	3.65917e-07	1.37163e-06
ENSG00000171475	WIPF2	0.769321	4.7575e-43	1.06697e-41
ENSG00000131747	TOP2A	0.768349	9.95898e-152	3.0599e-149
ENSG00000138778	CENPE	0.767925	1.82828e-70	9.91306e-69
ENSG00000124459	ZNF45	0.767889	2.07413e-16	1.43855e-15
ENSG00000105443	CYTH2	0.766751	7.76675e-27	9.13721e-26
ENSG00000179335	CLK3	0.766745	2.03855e-38	3.81918e-37
ENSG00000136286	MYO1G	0.765831	5.01632e-06	1.68628e-05
ENSG00000149115	TNKS1BP1	0.765351	6.74831e-62	2.89314e-60
ENSG00000175287	PHYHD1	0.765286	4.03467e-05	0.000123862
ENSG00000105497	ZNF175	0.765018	1.20461e-09	5.51221e-09
ENSG00000175920	DOK7	0.764562	2.72701e-05	8.52941e-05
ENSG00000188112	C6orf132	0.764344	1.49529e-18	1.16458e-17
ENSG00000112763	BTN2A1	0.76417	4.9837e-27	5.91594e-26
ENSG00000113263	ITK	0.763727	0.0110225	0.024344
ENSG00000129295	LRRC6	0.763477	0.0234039	0.0485978
ENSG00000174482	LINGO2	0.76311	0.00447613	0.0106091
ENSG00000102312	PORCN	0.761962	1.12234e-13	6.66783e-13
ENSG00000224051	CPTP	0.760936	4.89359e-12	2.65646e-11
ENSG00000167785	ZNF558	0.760824	2.13159e-12	1.18254e-11
ENSG00000186847	KRT14	0.760164	1.61746e-13	9.51127e-13
ENSG00000181929	PRKAG1	0.759857	7.54337e-41	1.56451e-39
ENSG00000085644	ZNF213	0.75969	9.7934e-10	4.51579e-09
ENSG00000196458	ZNF605	0.759684	2.17971e-07	8.3471e-07
ENSG00000168612	ZSWIM1	0.759288	8.83838e-14	5.26788e-13
ENSG00000102003	SYP	0.759258	0.0159262	0.0340761
ENSG00000112343	TRIM38	0.759209	1.33331e-12	7.45966e-12
ENSG00000196705	ZNF431	0.75905	5.61555e-16	3.81439e-15
ENSG00000130270	ATP8B3	0.75903	6.78333e-07	2.48709e-06
ENSG00000173210	ABLIM3	0.75871	1.34271e-14	8.43084e-14
ENSG00000163026	WDCP	0.758437	1.2613e-20	1.08705e-19
ENSG00000135392	DNAJC14	0.758335	6.64737e-49	1.91475e-47
ENSG00000073910	FRY	0.758167	9.21904e-08	3.64315e-07
ENSG00000111335	OAS2	0.757213	0.0234759	0.0487364
ENSG00000235750	KIAA0040	0.75619	1.94944e-46	5.01225e-45
ENSG00000243547	HNRNPKP4	0.756179	0.0172075	0.0365967
ENSG00000107742	SPOCK2	0.756146	0.0118082	0.0259396
ENSG00000126803	HSPA2	0.756086	4.62399e-05	0.000141038
ENSG00000169118	CSNK1G1	0.756009	9.86406e-32	1.41513e-30
ENSG00000118197	DDX59	0.75583	8.57259e-17	6.05037e-16
ENSG00000137628	DDX60	0.755377	4.39976e-13	2.52756e-12
ENSG00000153832	FBXO36	0.754615	0.00302235	0.00737953
ENSG00000105953	OGDH	0.754493	3.72738e-99	4.1116e-97
ENSG00000184481	FOXO4	0.753252	2.62709e-10	1.26121e-09
ENSG00000198855	FICD	0.753208	0.000134647	0.000390963
ENSG00000118412	CASP8AP2	0.753109	3.26874e-31	4.59293e-30
ENSG00000104936	DMPK	0.751345	9.2741e-21	8.04934e-20
ENSG00000149798	CDC42EP2	0.750815	2.87766e-23	2.83536e-22
ENSG00000170473	PYM1	0.750697	7.88554e-18	5.88781e-17
ENSG00000123485	HJURP	0.749369	3.59472e-52	1.1485e-50
ENSG00000267022	AC084219.2	0.749363	0.0101301	0.0225161
ENSG00000142961	MOB3C	0.748689	3.00755e-08	1.24175e-07
ENSG00000147144	CCDC120	0.747547	3.79951e-10	1.80201e-09
ENSG00000136504	KAT7	0.747436	2.99814e-45	7.40894e-44
ENSG00000138131	LOXL4	0.747391	2.56495e-08	1.06521e-07
ENSG00000090432	MUL1	0.747266	3.56698e-30	4.7963e-29
ENSG00000204959	ARHGEF34P	0.747146	1.7777e-08	7.47877e-08
ENSG00000179546	HTR1D	0.746591	4.22614e-23	4.12653e-22
ENSG00000124356	STAMBP	0.745803	1.21335e-34	1.95355e-33
ENSG00000132359	RAP1GAP2	0.7442	9.21116e-56	3.28448e-54
ENSG00000161265	U2AF1L4	0.743707	4.08139e-08	1.66904e-07
ENSG00000159899	NPR2	0.743588	1.8121e-06	6.37035e-06
ENSG00000129219	PLD2	0.743332	1.73069e-21	1.55484e-20
ENSG00000161664	ASB16	0.743264	0.00595178	0.0137947
ENSG00000204231	RXRB	0.741386	2.4878e-32	3.64858e-31
ENSG00000062598	ELMO2	0.741026	8.22751e-25	8.80802e-24
ENSG00000181873	IBA57	0.739618	1.11647e-10	5.51062e-10
ENSG00000136869	TLR4	0.739603	8.58703e-30	1.13886e-28
ENSG00000125945	ZNF436	0.739356	2.47035e-14	1.52515e-13
ENSG00000196083	IL1RAP	0.738961	2.9901e-22	2.79243e-21
ENSG00000157800	SLC37A3	0.738716	8.72337e-19	6.89012e-18
ENSG00000261052	SULT1A3	0.738129	5.84399e-07	2.15425e-06
ENSG00000196588	MKL1	0.737044	2.54636e-49	7.42755e-48
ENSG00000080986	NDC80	0.736489	1.42706e-33	2.21074e-32
ENSG00000173267	SNCG	0.736454	4.12016e-19	3.31103e-18
ENSG00000184194	GPR173	0.736282	4.41008e-05	0.00013496
ENSG00000135956	TMEM127	0.735688	7.96745e-34	1.2458e-32
ENSG00000143363	PRUNE1	0.735614	6.84971e-19	5.45226e-18
ENSG00000241878	PISD	0.734486	1.39926e-24	1.48079e-23
ENSG00000103196	CRISPLD2	0.733214	7.54073e-07	2.75056e-06
ENSG00000179820	MYADM	0.733088	1.20974e-55	4.28875e-54
ENSG00000123374	CDK2	0.732092	1.6649e-66	8.07696e-65
ENSG00000079308	TNS1	0.73202	8.9315e-18	6.65799e-17
ENSG00000134253	TRIM45	0.731856	4.49383e-09	1.97388e-08
ENSG00000204209	DAXX	0.731667	1.36241e-48	3.89395e-47
ENSG00000100109	TFIP11	0.729868	1.40948e-30	1.92472e-29
ENSG00000100417	PMM1	0.729119	2.68234e-18	2.05951e-17
ENSG00000135736	CCDC102A	0.727589	8.71033e-06	2.86247e-05
ENSG00000168438	CDC40	0.727548	3.80352e-24	3.94142e-23
ENSG00000094631	HDAC6	0.727505	2.26373e-31	3.19295e-30
ENSG00000103042	SLC38A7	0.726699	1.4557e-23	1.46006e-22
ENSG00000149930	TAOK2	0.726607	7.23058e-43	1.60791e-41
ENSG00000186280	KDM4D	0.726528	0.0108539	0.0240063
ENSG00000165995	CACNB2	0.72588	0.0175118	0.037201
ENSG00000108604	SMARCD2	0.725857	6.31596e-29	8.14798e-28
ENSG00000144230	GPR17	0.725536	0.013772	0.0298327
ENSG00000147421	HMBOX1	0.725008	7.16087e-10	3.33445e-09
ENSG00000253846	PCDHGA10	0.724885	0.0156178	0.0334613
ENSG00000254995	STX16-NPEPL1	0.724702	0.0239992	0.0497387
ENSG00000116138	DNAJC16	0.724447	6.53397e-23	6.29001e-22
ENSG00000111665	CDCA3	0.723362	7.32821e-37	1.29154e-35
ENSG00000178826	TMEM139	0.722887	0.000794412	0.00210326
ENSG00000123810	B9D2	0.722769	0.000163264	0.000468958
ENSG00000079432	CIC	0.722122	1.95809e-31	2.77033e-30
ENSG00000066117	SMARCD1	0.722063	7.2886e-74	4.40542e-72
ENSG00000007384	RHBDF1	0.721568	2.28819e-08	9.53498e-08
ENSG00000134830	C5AR2	0.72138	8.63531e-05	0.000256059
ENSG00000148356	LRSAM1	0.720752	8.03313e-17	5.67615e-16
ENSG00000166224	SGPL1	0.7207	4.61951e-36	7.87067e-35
ENSG00000186918	ZNF395	0.720458	1.52071e-05	4.87468e-05
ENSG00000160352	ZNF714	0.720412	2.29648e-18	1.77137e-17
ENSG00000160404	TOR2A	0.720143	3.25658e-07	1.22621e-06
ENSG00000204228	HSD17B8	0.719988	1.02916e-06	3.71137e-06
ENSG00000094880	CDC23	0.719961	3.76368e-41	7.88448e-40
ENSG00000112033	PPARD	0.719618	3.51251e-16	2.41346e-15
ENSG00000115163	CENPA	0.719575	4.96856e-18	3.74317e-17
ENSG00000090989	EXOC1	0.719563	3.0408e-23	2.98971e-22
ENSG00000179933	C14orf119	0.719549	4.91727e-19	3.93959e-18
ENSG00000137221	TJAP1	0.719329	1.35703e-23	1.36258e-22
ENSG00000196696	PDXDC2P	0.719107	0.000388579	0.0010679
ENSG00000231087	FDPSP7	0.719007	0.0187142	0.0395547
ENSG00000179750	APOBEC3B	0.718869	1.2587e-06	4.50303e-06
ENSG00000054118	THRAP3	0.716335	9.46386e-89	8.51055e-87
ENSG00000126838	PZP	0.716266	5.98784e-05	0.000180266
ENSG00000113734	BNIP1	0.716184	3.63745e-10	1.72915e-09
ENSG00000104643	MTMR9	0.71552	1.66751e-19	1.3602e-18
ENSG00000138780	GSTCD	0.715149	2.21387e-21	1.98024e-20
ENSG00000126787	DLGAP5	0.715032	3.5701e-49	1.03973e-47
ENSG00000152936	LMNTD1	0.714026	0.0207414	0.0434755
ENSG00000114473	IQCG	0.713342	0.000952924	0.00249498
ENSG00000160813	PPP1R35	0.713129	1.38802e-10	6.81261e-10
ENSG00000167107	ACSF2	0.712802	0.00461129	0.010907
ENSG00000069020	MAST4	0.712742	2.84224e-08	1.1756e-07
ENSG00000163346	PBXIP1	0.712156	6.08823e-14	3.66786e-13
ENSG00000013588	GPRC5A	0.711984	4.99223e-75	3.13033e-73
ENSG00000127081	ZNF484	0.710123	1.56711e-05	5.01645e-05
ENSG00000164117	FBXO8	0.709977	1.04431e-10	5.15998e-10
ENSG00000125740	FOSB	0.709423	6.32818e-14	3.80993e-13
ENSG00000088038	CNOT3	0.708937	1.4386e-40	2.92399e-39
ENSG00000138092	CENPO	0.708541	3.99726e-37	7.12665e-36
ENSG00000143228	NUF2	0.707701	1.54984e-28	1.96367e-27
ENSG00000143303	RRNAD1	0.707594	1.7101e-08	7.21577e-08
ENSG00000167767	KRT80	0.70738	6.5128e-86	5.43274e-84
ENSG00000117036	ETV3	0.707088	4.36312e-21	3.86517e-20
ENSG00000172765	TMCC1	0.70704	6.65223e-16	4.48879e-15
ENSG00000087152	ATXN7L3	0.705575	2.46831e-40	4.98393e-39
ENSG00000170037	CNTROB	0.705334	6.52612e-33	9.82114e-32
ENSG00000198626	RYR2	0.704889	0.0206202	0.0432364
ENSG00000004777	ARHGAP33	0.704665	4.63828e-07	1.72567e-06
ENSG00000120738	EGR1	0.704305	1.39388e-35	2.30459e-34
ENSG00000177409	SAMD9L	0.704252	5.7664e-05	0.000173898
ENSG00000103274	NUBP1	0.703523	6.92991e-19	5.51372e-18
ENSG00000100982	PCIF1	0.703305	1.36539e-21	1.23569e-20
ENSG00000132196	HSD17B7	0.70312	4.52403e-08	1.84148e-07
ENSG00000155085	AK9	0.703095	0.000522238	0.00141269
ENSG00000221838	AP4M1	0.702686	3.5228e-10	1.67768e-09
ENSG00000050405	LIMA1	0.702506	5.18415e-50	1.5616e-48
ENSG00000163832	ELP6	0.702358	1.62993e-27	1.97293e-26
ENSG00000075218	GTSE1	0.701721	1.46396e-43	3.38197e-42
ENSG00000241852	C8orf58	0.701537	7.41785e-09	3.20854e-08
ENSG00000165006	UBAP1	0.701039	8.16604e-63	3.60146e-61
ENSG00000204308	RNF5	0.700544	7.69859e-22	7.03288e-21
ENSG00000124688	MAD2L1BP	0.700304	9.8723e-16	6.60363e-15
ENSG00000213782	DDX47	0.698863	4.5143e-48	1.25522e-46
ENSG00000197142	ACSL5	0.698604	0.00239951	0.00594316
ENSG00000248672	LY75-CD302	0.698535	0.0135904	0.0294794
ENSG00000167842	MIS12	0.698505	1.61734e-28	2.04637e-27
ENSG00000135046	ANXA1	0.697655	6.65188e-83	5.21819e-81
ENSG00000056558	TRAF1	0.696493	0.00278495	0.00683266
ENSG00000174130	TLR6	0.696453	2.32469e-08	9.68102e-08
ENSG00000244122	UGT1A7	0.695896	0.0111374	0.0245831
ENSG00000171302	CANT1	0.695447	6.53451e-30	8.70402e-29
ENSG00000141068	KSR1	0.693526	1.07251e-20	9.26512e-20
ENSG00000133107	TRPC4	0.693469	6.49642e-06	2.15787e-05
ENSG00000251192	ZNF674	0.69158	3.79899e-05	0.000116977
ENSG00000137965	IFI44	0.691501	4.3059e-11	2.19401e-10
ENSG00000103111	MON1B	0.690936	1.00203e-25	1.11886e-24
ENSG00000146143	PRIM2	0.690742	3.70501e-20	3.12738e-19
ENSG00000158006	PAFAH2	0.690194	9.04329e-12	4.81829e-11
ENSG00000128944	KNSTRN	0.689147	2.89931e-53	9.64781e-52
ENSG00000104835	SARS2	0.688965	2.01388e-18	1.55795e-17
ENSG00000079257	LXN	0.688963	5.66523e-07	2.09296e-06
ENSG00000068079	IFI35	0.688923	8.47825e-07	3.08217e-06
ENSG00000188554	NBR1	0.688042	1.00722e-61	4.26853e-60
ENSG00000196205	EEF1A1P5	0.688027	1.45004e-06	5.14562e-06
ENSG00000183077	AFMID	0.687678	3.16926e-14	1.94492e-13
ENSG00000080815	PSEN1	0.684595	3.87196e-31	5.42398e-30
ENSG00000131037	EPS8L1	0.68452	0.00245291	0.00606645
ENSG00000239779	WBP1	0.683961	9.82513e-10	4.52929e-09
ENSG00000104884	ERCC2	0.683934	9.60875e-46	2.41003e-44
ENSG00000067836	ROGDI	0.683761	1.64357e-11	8.62978e-11
ENSG00000099968	BCL2L13	0.683692	1.50689e-38	2.84335e-37
ENSG00000006611	USH1C	0.683336	0.00127548	0.00328354
ENSG00000101224	CDC25B	0.683314	1.85954e-58	7.14179e-57
ENSG00000198223	CSF2RA	0.683205	1.84146e-06	6.46984e-06
ENSG00000169155	ZBTB43	0.682686	2.18934e-21	1.95925e-20
ENSG00000141052	MYOCD	0.682583	1.65959e-23	1.65645e-22
ENSG00000143553	SNAPIN	0.682394	9.05438e-20	7.47838e-19
ENSG00000167378	IRGQ	0.682242	4.95283e-14	3.00149e-13
ENSG00000172466	ZNF24	0.680439	9.16686e-39	1.74939e-37
ENSG00000256060	TRAPPC2B	0.680403	3.83908e-06	1.30578e-05
ENSG00000117148	ACTL8	0.680351	0.0066791	0.0153298
ENSG00000197714	ZNF460	0.680096	0.000318329	0.000885662
ENSG00000182378	PLCXD1	0.680063	1.3822e-18	1.07878e-17
ENSG00000113319	RASGRF2	0.679336	0.0140321	0.0303509
ENSG00000105137	SYDE1	0.679062	8.27003e-36	1.38724e-34
ENSG00000204257	HLA-DMA	0.678927	0.00628188	0.0144867
ENSG00000183765	CHEK2	0.678276	6.13757e-12	3.30933e-11
ENSG00000184517	ZFP1	0.677702	4.47503e-10	2.11477e-09
ENSG00000127993	RBM48	0.677467	1.4892e-11	7.83709e-11
ENSG00000120860	CCDC53	0.677225	5.21473e-09	2.27589e-08
ENSG00000167380	ZNF226	0.677	4.59386e-09	2.01638e-08
ENSG00000132581	SDF2	0.676805	3.36447e-18	2.56828e-17
ENSG00000162734	PEA15	0.676595	3.27422e-67	1.64469e-65
ENSG00000196388	INCA1	0.676124	0.00731955	0.0166938
ENSG00000099999	RNF215	0.675989	8.83102e-07	3.20535e-06
ENSG00000132000	PODNL1	0.674706	0.00757953	0.0172398
ENSG00000005486	RHBDD2	0.673802	7.72194e-18	5.76799e-17
ENSG00000068489	PRR11	0.673237	6.41585e-59	2.51117e-57
ENSG00000091732	ZC3HC1	0.672628	3.00107e-23	2.95381e-22
ENSG00000078070	MCCC1	0.671856	1.58061e-13	9.30352e-13
ENSG00000133961	NUMB	0.670629	1.32317e-28	1.68341e-27
ENSG00000179151	EDC3	0.670455	8.78938e-40	1.74604e-38
ENSG00000205413	SAMD9	0.670219	4.08096e-23	3.989e-22
ENSG00000235387	LINC00961	0.668654	0.0195891	0.0412808
ENSG00000011332	DPF1	0.668446	0.000564124	0.00151952
ENSG00000130158	DOCK6	0.668334	4.65262e-09	2.04071e-08
ENSG00000278318	ZNF229	0.667625	5.30804e-06	1.77851e-05
ENSG00000171466	ZNF562	0.667264	2.03879e-16	1.4151e-15
ENSG00000138433	CIR1	0.666972	8.60812e-12	4.59441e-11
ENSG00000140464	PML	0.666553	2.23473e-20	1.90817e-19
ENSG00000140526	ABHD2	0.66607	8.61004e-54	2.90707e-52
ENSG00000101337	TM9SF4	0.665761	5.83704e-41	1.22002e-39
ENSG00000196155	PLEKHG4	0.665705	1.50514e-30	2.04928e-29
ENSG00000141179	PCTP	0.665656	6.81044e-08	2.72936e-07
ENSG00000198952	SMG5	0.665561	5.49959e-49	1.5941e-47
ENSG00000149357	LAMTOR1	0.665169	2.26716e-34	3.61236e-33
ENSG00000080298	RFX3	0.665004	1.60329e-09	7.26208e-09
ENSG00000148154	UGCG	0.664968	2.09808e-25	2.30914e-24
ENSG00000182541	LIMK2	0.664703	9.92417e-25	1.05936e-23
ENSG00000120899	PTK2B	0.664363	1.25087e-09	5.71068e-09
ENSG00000156050	FAM161B	0.6634	0.000900873	0.00236845
ENSG00000171532	NEUROD2	0.663353	0.00910829	0.0204024
ENSG00000168495	POLR3D	0.663321	5.12708e-32	7.41316e-31
ENSG00000217026	RPL10P1	0.663268	0.0132429	0.0288096
ENSG00000197372	ZNF675	0.662949	1.28967e-07	5.05207e-07
ENSG00000154920	EME1	0.662553	6.33753e-15	4.04965e-14
ENSG00000105048	TNNT1	0.661561	0.00175985	0.00444484
ENSG00000240038	AMY2B	0.661099	0.00345459	0.00834232
ENSG00000163719	MTMR14	0.661014	5.95726e-23	5.75714e-22
ENSG00000130669	PAK4	0.660695	2.45809e-13	1.43084e-12
ENSG00000122707	RECK	0.660301	9.20128e-10	4.25233e-09
ENSG00000167447	SMG8	0.660225	8.89597e-21	7.72842e-20
ENSG00000188681	TEKT4P2	0.660179	0.00109208	0.00283357
ENSG00000221909	FAM200A	0.66013	5.8523e-07	2.15688e-06
ENSG00000225828	FAM229A	0.659973	0.00207591	0.00518274
ENSG00000139793	MBNL2	0.65982	3.89283e-37	6.95391e-36
ENSG00000143437	ARNT	0.659752	1.91752e-37	3.46904e-36
ENSG00000080189	SLC35C2	0.659546	9.22423e-25	9.85789e-24
ENSG00000176986	SEC24C	0.659425	8.58486e-62	3.66347e-60
ENSG00000166169	POLL	0.659125	2.25355e-11	1.16927e-10
ENSG00000138380	CARF	0.659061	0.0183873	0.0389219
ENSG00000148180	GSN	0.65786	1.07178e-47	2.92715e-46
ENSG00000205336	ADGRG1	0.657681	2.39213e-57	8.89091e-56
ENSG00000040531	CTNS	0.657465	2.8162e-14	1.73286e-13
ENSG00000158315	RHBDL2	0.657128	0.0173796	0.0369371
ENSG00000254996	ANKHD1-EIF4EBP3	0.657048	4.62143e-27	5.50363e-26
ENSG00000158825	CDA	0.656997	1.39279e-44	3.35196e-43
ENSG00000162458	FBLIM1	0.656764	1.16362e-14	7.32629e-14
ENSG00000006740	ARHGAP44	0.656602	1.26438e-05	4.09214e-05
ENSG00000186866	POFUT2	0.656559	8.17459e-14	4.88646e-13
ENSG00000256771	ZNF253	0.655833	0.00767138	0.0174294
ENSG00000182326	C1S	0.655726	4.46873e-13	2.56559e-12
ENSG00000100938	GMPR2	0.655545	4.59549e-18	3.47204e-17
ENSG00000105136	ZNF419	0.654795	2.52317e-06	8.73841e-06
ENSG00000164989	CCDC171	0.654728	0.00331534	0.00803236
ENSG00000160602	NEK8	0.65458	0.000751525	0.00199803
ENSG00000160445	ZER1	0.65458	1.87323e-17	1.37637e-16
ENSG00000154153	FAM134B	0.654114	9.44573e-10	4.36203e-09
ENSG00000167106	FAM102A	0.653824	1.16613e-20	1.00597e-19
ENSG00000139546	TARBP2	0.653258	8.92746e-16	5.99554e-15
ENSG00000089091	DZANK1	0.653089	0.00481122	0.011342
ENSG00000162735	PEX19	0.651859	7.2886e-35	1.18071e-33
ENSG00000113140	SPARC	0.651537	0.00330765	0.00801585
ENSG00000172725	CORO1B	0.651454	4.30143e-17	3.08548e-16
ENSG00000167900	TK1	0.651354	2.83604e-30	3.8274e-29
ENSG00000135452	TSPAN31	0.651177	4.91769e-09	2.15083e-08
ENSG00000140682	TGFB1I1	0.650978	2.58665e-24	2.7017e-23
ENSG00000205659	LIN52	0.650463	6.61471e-10	3.08558e-09
ENSG00000185261	KIAA0825	0.650417	4.35767e-07	1.62454e-06
ENSG00000008300	CELSR3	0.650358	8.93057e-27	1.0473e-25
ENSG00000174483	BBS1	0.649908	2.35679e-10	1.13618e-09
ENSG00000185745	IFIT1	0.649708	1.15724e-13	6.87296e-13
ENSG00000116212	LRRC42	0.649225	9.00473e-24	9.12602e-23
ENSG00000139725	RHOF	0.649092	1.21103e-18	9.48e-18
ENSG00000087266	SH3BP2	0.648312	8.19631e-13	4.65063e-12
ENSG00000205534	SMG1P2	0.647332	0.000598778	0.00160747
ENSG00000128346	C22orf23	0.647081	0.00191976	0.00481572
ENSG00000107185	RGP1	0.647015	7.064e-45	1.72255e-43
ENSG00000056972	TRAF3IP2	0.646629	3.6733e-13	2.11749e-12
ENSG00000164039	BDH2	0.646493	1.01417e-07	4.0009e-07
ENSG00000137440	FGFBP1	0.645722	0.0129625	0.0282362
ENSG00000170190	SLC16A5	0.645467	9.02463e-11	4.48072e-10
ENSG00000269335	IKBKG	0.645185	3.76608e-28	4.6879e-27
ENSG00000169607	CKAP2L	0.645151	3.84409e-28	4.77855e-27
ENSG00000175084	DES	0.645144	0.0207685	0.0435275
ENSG00000150540	HNMT	0.644844	3.09355e-10	1.4786e-09
ENSG00000121542	SEC22A	0.64449	2.07364e-10	1.0052e-09
ENSG00000163491	NEK10	0.644099	0.00019702	0.000561456
ENSG00000144426	NBEAL1	0.643426	4.76712e-11	2.42032e-10
ENSG00000283263	AL135787.1	0.643307	2.9852e-05	9.2991e-05
ENSG00000157191	NECAP2	0.643218	9.67846e-29	1.23819e-27
ENSG00000155252	PI4K2A	0.642787	7.94854e-22	7.25762e-21
ENSG00000175203	DCTN2	0.642724	3.89518e-43	8.78919e-42
ENSG00000125734	GPR108	0.642222	7.42608e-18	5.55374e-17
ENSG00000146670	CDCA5	0.641679	3.54718e-45	8.71896e-44
ENSG00000184860	SDR42E1	0.641501	0.000105454	0.000310005
ENSG00000021355	SERPINB1	0.641455	3.94189e-14	2.40148e-13
ENSG00000188419	CHM	0.641347	9.80242e-24	9.90179e-23
ENSG00000176907	C8orf4	0.639538	2.12991e-39	4.16382e-38
ENSG00000113916	BCL6	0.639338	7.15006e-09	3.09562e-08
ENSG00000171448	ZBTB26	0.639291	1.652e-10	8.05463e-10
ENSG00000165272	AQP3	0.63913	1.95837e-41	4.15449e-40
ENSG00000214978	GSG1L2	0.63906	0.0214803	0.0449018
ENSG00000182481	KPNA2	0.638238	8.1029e-93	7.90354e-91
ENSG00000176386	CDC26	0.63771	1.12107e-12	6.30282e-12
ENSG00000105705	SUGP1	0.637316	4.65048e-18	3.51071e-17
ENSG00000188985	DHFRP1	0.63701	0.00343331	0.00829312
ENSG00000134057	CCNB1	0.636399	3.83405e-73	2.25098e-71
ENSG00000160785	SLC25A44	0.636327	8.02912e-33	1.19949e-31
ENSG00000135740	SLC9A5	0.635818	0.0178352	0.0378444
ENSG00000139531	SUOX	0.635382	4.645e-12	2.52523e-11
ENSG00000117408	IPO13	0.635218	8.18495e-24	8.31348e-23
ENSG00000259024	TVP23C-CDRT4	0.635051	0.00107041	0.00278203
ENSG00000010361	FUZ	0.634834	2.43426e-05	7.65403e-05
ENSG00000214756	METTL12	0.633232	0.00184703	0.00464782
ENSG00000103510	KAT8	0.633094	9.5803e-15	6.065e-14
ENSG00000270804	CTD-2583A14.11	0.63285	0.00621025	0.0143412
ENSG00000148308	GTF3C5	0.63271	9.11631e-41	1.87566e-39
ENSG00000168237	GLYCTK	0.632627	4.19226e-07	1.56573e-06
ENSG00000144063	MALL	0.632622	2.51067e-09	1.12123e-08
ENSG00000142677	IL22RA1	0.632268	0.00625068	0.0144238
ENSG00000171940	ZNF217	0.632087	1.20294e-23	1.21182e-22
ENSG00000102174	PHEX	0.632051	0.0202254	0.0424761
ENSG00000166997	CNPY4	0.63192	5.38818e-08	2.1764e-07
ENSG00000075391	RASAL2	0.631721	2.25548e-21	2.01648e-20
ENSG00000155034	FBXL18	0.631693	2.02965e-09	9.13936e-09
ENSG00000164976	KIAA1161	0.631527	1.05377e-34	1.69958e-33
ENSG00000074319	TSG101	0.631244	2.53087e-22	2.37317e-21
ENSG00000128335	APOL2	0.630508	4.07729e-17	2.93612e-16
ENSG00000240771	ARHGEF25	0.630196	0.000393997	0.00108166
ENSG00000111726	CMAS	0.630184	8.32879e-19	6.58692e-18
ENSG00000004700	RECQL	0.629999	2.77687e-35	4.54631e-34
ENSG00000198959	TGM2	0.628983	3.43725e-34	5.44379e-33
ENSG00000167395	ZNF646	0.628434	5.43104e-14	3.28158e-13
ENSG00000113578	FGF1	0.628218	0.0145927	0.0314492
ENSG00000172987	HPSE2	0.62797	0.0192393	0.0405948
ENSG00000067182	TNFRSF1A	0.62795	2.06639e-48	5.84262e-47
ENSG00000243279	PRAF2	0.627496	2.01651e-22	1.90053e-21
ENSG00000116299	KIAA1324	0.627307	0.000125237	0.000364962
ENSG00000153975	ZUFSP	0.626699	1.57205e-06	5.56126e-06
ENSG00000213977	TAX1BP3	0.626112	3.37679e-23	3.30947e-22
ENSG00000113327	GABRG2	0.626065	0.0195001	0.0410981
ENSG00000121067	SPOP	0.625711	8.11695e-22	7.40772e-21
ENSG00000111785	RIC8B	0.625418	3.78948e-11	1.93838e-10
ENSG00000182150	ERCC6L2	0.623705	1.59814e-14	9.98704e-14
ENSG00000155366	RHOC	0.623488	1.30686e-52	4.24154e-51
ENSG00000156858	PRR14	0.622718	8.4792e-14	5.06526e-13
ENSG00000108439	PNPO	0.621943	3.20237e-25	3.49737e-24
ENSG00000156150	ALX3	0.621901	0.00823649	0.0185987
ENSG00000158195	WASF2	0.621876	2.72171e-77	1.83119e-75
ENSG00000069509	FUNDC1	0.620592	3.99451e-13	2.29834e-12
ENSG00000138658	ZGRF1	0.620378	5.66496e-10	2.65667e-09
ENSG00000186272	ZNF17	0.620238	1.68132e-05	5.36993e-05
ENSG00000152580	IGSF10	0.620095	1.26676e-46	3.28913e-45
ENSG00000177105	RHOG	0.619567	1.61413e-15	1.06616e-14
ENSG00000014138	POLA2	0.619487	5.89196e-25	6.36311e-24
ENSG00000104381	GDAP1	0.619478	8.54542e-10	3.95916e-09
ENSG00000174529	TMEM81	0.619367	0.00425657	0.0101278
ENSG00000188878	FBF1	0.61874	4.92093e-07	1.82788e-06
ENSG00000100441	KHNYN	0.618214	6.3127e-21	5.54648e-20
ENSG00000135338	LCA5	0.617797	0.000561513	0.00151316
ENSG00000282034	RP11-2C24.9	0.617715	0.00077448	0.00205462
ENSG00000049249	TNFRSF9	0.61709	0.0135865	0.0294794
ENSG00000092929	UNC13D	0.617013	9.85145e-40	1.95281e-38
ENSG00000125170	DOK4	0.616874	2.03435e-17	1.49059e-16
ENSG00000160298	C21orf58	0.616813	1.25312e-06	4.48568e-06
ENSG00000178028	DMAP1	0.616492	4.11116e-24	4.25304e-23
ENSG00000140497	SCAMP2	0.616362	4.96944e-28	6.15256e-27
ENSG00000108599	AKAP10	0.616361	3.01365e-22	2.813e-21
ENSG00000170379	TCAF2	0.616219	0.00235725	0.00584634
ENSG00000161638	ITGA5	0.615388	3.55626e-68	1.81606e-66
ENSG00000102226	USP11	0.615215	2.95913e-34	4.69058e-33
ENSG00000112308	C6orf62	0.615164	9.39794e-46	2.36037e-44
ENSG00000168000	BSCL2	0.614938	6.51562e-08	2.61462e-07
ENSG00000105778	AVL9	0.614755	7.24095e-26	8.15437e-25
ENSG00000146166	LGSN	0.614366	0.0102588	0.0227829
ENSG00000170876	TMEM43	0.613688	2.78702e-52	8.96661e-51
ENSG00000072195	SPEG	0.612669	1.73742e-12	9.6736e-12
ENSG00000079435	LIPE	0.612402	0.0150102	0.032266
ENSG00000105085	MED26	0.612284	1.62304e-06	5.73194e-06
ENSG00000128578	STRIP2	0.61216	0.00153636	0.00391146
ENSG00000127580	WDR24	0.611795	7.38181e-08	2.94553e-07
ENSG00000138593	SECISBP2L	0.611755	9.60245e-16	6.42778e-15
ENSG00000175426	PCSK1	0.611096	4.81579e-06	1.62094e-05
ENSG00000042445	RETSAT	0.61103	1.27174e-21	1.15265e-20
ENSG00000142408	CACNG8	0.609794	0.0230174	0.0478491
ENSG00000089685	BIRC5	0.609329	1.42083e-54	4.87765e-53
ENSG00000105619	TFPT	0.608831	8.61821e-08	3.4145e-07
ENSG00000105662	CRTC1	0.60865	2.4986e-06	8.65659e-06
ENSG00000198960	ARMCX6	0.60859	2.87466e-14	1.76707e-13
ENSG00000100209	HSCB	0.607902	2.92524e-06	1.00722e-05
ENSG00000102100	SLC35A2	0.607864	1.86699e-18	1.44674e-17
ENSG00000172888	ZNF621	0.607732	7.51442e-22	6.86804e-21
ENSG00000161914	ZNF653	0.607584	0.00763868	0.0173593
ENSG00000177054	ZDHHC13	0.607301	7.40097e-07	2.70225e-06
ENSG00000090971	NAT14	0.60703	7.8491e-11	3.90865e-10
ENSG00000057294	PKP2	0.606992	3.73148e-08	1.52968e-07
ENSG00000175063	UBE2C	0.606964	5.0518e-35	8.21252e-34
ENSG00000197283	SYNGAP1	0.606895	4.76441e-11	2.41961e-10
ENSG00000130717	UCK1	0.606752	1.89096e-17	1.38718e-16
ENSG00000237651	C2orf74	0.606442	9.6021e-07	3.47224e-06
ENSG00000140950	TLDC1	0.606166	7.4066e-18	5.54142e-17
ENSG00000100888	CHD8	0.605544	6.40982e-49	1.84922e-47
ENSG00000185100	ADSSL1	0.604552	0.000360367	0.000995112
ENSG00000197818	SLC9A8	0.604054	6.25767e-11	3.14281e-10
ENSG00000261796	ISY1-RAB43	0.603994	4.47715e-05	0.000136922
ENSG00000078804	TP53INP2	0.603947	5.63698e-08	2.27291e-07
ENSG00000277656	GSTT1	0.603839	6.0642e-08	2.44037e-07
ENSG00000267323	SLC25A1P5	0.603709	0.00283341	0.0069423
ENSG00000158793	NIT1	0.602549	3.74454e-11	1.91645e-10
ENSG00000012822	CALCOCO1	0.602417	2.81895e-12	1.55544e-11
ENSG00000181222	POLR2A	0.602086	8.39453e-61	3.48543e-59
ENSG00000125657	TNFSF9	0.6016	2.36288e-09	1.05702e-08
ENSG00000133789	SWAP70	0.601494	2.01923e-29	2.64755e-28
ENSG00000258989	RP11-47I22.4	0.601374	0.000327904	0.000910789
ENSG00000136925	TSTD2	0.601187	1.63923e-15	1.08235e-14
ENSG00000147439	BIN3	0.600641	1.3867e-07	5.40806e-07
ENSG00000162129	CLPB	0.600428	2.87975e-23	2.83591e-22
ENSG00000181666	HKR1	0.600243	1.17642e-10	5.79722e-10
ENSG00000178585	CTNNBIP1	0.599642	0.0040239	0.00961511
ENSG00000116273	PHF13	0.599622	6.34187e-12	3.41549e-11
ENSG00000162517	PEF1	0.598991	1.48367e-28	1.88501e-27
ENSG00000177868	SVBP	0.598717	2.09474e-05	6.61923e-05
ENSG00000132718	SYT11	0.598404	0.001064	0.00276616
ENSG00000153558	FBXL2	0.598148	5.44097e-06	1.81908e-05
ENSG00000150361	KLHL1	0.598126	0.00185184	0.0046574
ENSG00000159111	MRPL10	0.597599	1.93413e-26	2.23547e-25
ENSG00000196275	GTF2IRD2	0.59739	0.00305172	0.00744159
ENSG00000009830	POMT2	0.597098	2.74974e-15	1.79757e-14
ENSG00000084652	TXLNA	0.596988	2.66532e-55	9.35909e-54
ENSG00000102882	MAPK3	0.596829	8.8936e-15	5.64773e-14
ENSG00000142661	MYOM3	0.596791	0.000586142	0.00157538
ENSG00000135537	LACE1	0.595764	0.00135488	0.00347727
ENSG00000105556	MIER2	0.595584	1.91728e-06	6.72216e-06
ENSG00000108433	GOSR2	0.595534	2.45455e-18	1.88697e-17
ENSG00000204219	TCEA3	0.595485	0.00479567	0.0113083
ENSG00000113971	NPHP3	0.595409	0.000115536	0.000338456
ENSG00000108846	ABCC3	0.595045	2.54096e-23	2.51302e-22
ENSG00000167674	CTB-50L17.10	0.594677	4.06181e-17	2.92612e-16
ENSG00000136754	ABI1	0.594487	1.2906e-21	1.16857e-20
ENSG00000153140	CETN3	0.594231	1.5565e-08	6.58422e-08
ENSG00000102977	ACD	0.594028	1.76678e-10	8.59609e-10
ENSG00000160752	FDPS	0.593714	6.97516e-43	1.55486e-41
ENSG00000105287	PRKD2	0.593634	4.56066e-12	2.48158e-11
ENSG00000281028	RP11-717K11.2	0.593415	0.000960966	0.00251389
ENSG00000163947	ARHGEF3	0.59338	5.08953e-07	1.88898e-06
ENSG00000074964	ARHGEF10L	0.592208	8.44862e-11	4.19699e-10
ENSG00000131845	ZNF304	0.592144	1.60721e-08	6.79096e-08
ENSG00000072958	AP1M1	0.592129	8.62861e-22	7.85136e-21
ENSG00000170271	FAXDC2	0.591926	0.0112993	0.0249107
ENSG00000162687	KCNT2	0.591896	0.0153357	0.0329159
ENSG00000052841	TTC17	0.591565	1.02635e-32	1.5234e-31
ENSG00000005189	AC004381.6	0.59137	2.58753e-07	9.83536e-07
ENSG00000142687	KIAA0319L	0.591209	3.7373e-29	4.85532e-28
ENSG00000080822	CLDND1	0.591096	6.41067e-13	3.65093e-12
ENSG00000137699	TRIM29	0.590676	3.03963e-18	2.32706e-17
ENSG00000029364	SLC39A9	0.590616	3.18964e-26	3.64997e-25
ENSG00000101844	ATG4A	0.590507	4.61562e-10	2.17897e-09
ENSG00000204084	INPP5B	0.590324	6.56895e-15	4.19171e-14
ENSG00000131408	NR1H2	0.590289	3.32414e-11	1.70793e-10
ENSG00000186635	ARAP1	0.589846	3.46442e-25	3.78132e-24
ENSG00000261794	GOLGA8H	0.589791	0.00241141	0.00597024
ENSG00000162576	MXRA8	0.588734	0.012495	0.0273083
ENSG00000129195	FAM64A	0.588702	5.49512e-21	4.84933e-20
ENSG00000166825	ANPEP	0.588354	7.1782e-19	5.70388e-18
ENSG00000119559	C19orf25	0.588043	4.26953e-06	1.44579e-05
ENSG00000160588	MPZL3	0.587482	0.00598668	0.0138701
ENSG00000177303	CASKIN2	0.587251	2.09848e-09	9.43461e-09
ENSG00000066279	ASPM	0.587006	3.3995e-37	6.08789e-36
ENSG00000144036	EXOC6B	0.586699	2.80323e-14	1.72604e-13
ENSG00000136631	VPS45	0.586542	6.11802e-21	5.38117e-20
ENSG00000050730	TNIP3	0.586528	0.0152384	0.0327184
ENSG00000067596	DHX8	0.58629	1.86622e-34	2.97869e-33
ENSG00000089289	IGBP1	0.586249	1.33878e-19	1.09544e-18
ENSG00000175482	POLD4	0.586166	6.70151e-05	0.000200653
ENSG00000136280	CCM2	0.586112	1.02738e-17	7.64317e-17
ENSG00000109452	INPP4B	0.585821	1.21291e-08	5.17352e-08
ENSG00000169905	TOR1AIP2	0.585733	1.15555e-31	1.65392e-30
ENSG00000065029	ZNF76	0.585313	2.84507e-11	1.46792e-10
ENSG00000005194	CIAPIN1	0.584469	7.20685e-34	1.13071e-32
ENSG00000160055	TMEM234	0.584427	1.37043e-06	4.8838e-06
ENSG00000167685	ZNF444	0.584002	3.58599e-10	1.70645e-09
ENSG00000125650	PSPN	0.583916	0.0159486	0.0341174
ENSG00000251474	RPL32P3	0.583623	4.55803e-05	0.000139141
ENSG00000140259	MFAP1	0.583096	2.19033e-24	2.29555e-23
ENSG00000167880	EVPL	0.582857	2.77825e-13	1.61314e-12
ENSG00000198746	GPATCH3	0.582829	1.85706e-11	9.70104e-11
ENSG00000011677	GABRA3	0.582073	9.28616e-07	3.36459e-06
ENSG00000118873	RAB3GAP2	0.580743	1.73983e-34	2.77935e-33
ENSG00000162894	FCMR	0.58074	5.27852e-05	0.000159865
ENSG00000132604	TERF2	0.579091	5.42729e-16	3.68924e-15
ENSG00000117614	SYF2	0.579078	2.63612e-16	1.82079e-15
ENSG00000116954	RRAGC	0.57897	4.3877e-17	3.14614e-16
ENSG00000181191	PJA1	0.57891	4.09656e-10	1.94089e-09
ENSG00000148925	BTBD10	0.578639	8.13385e-13	4.61661e-12
ENSG00000213762	ZNF134	0.578367	3.08258e-09	1.36736e-08
ENSG00000099910	KLHL22	0.578216	0.000729653	0.00194212
ENSG00000079313	REXO1	0.578196	4.46447e-09	1.96145e-08
ENSG00000231007	CDC20P1	0.577559	0.005729	0.0133234
ENSG00000135828	RNASEL	0.577064	0.00823553	0.0185987
ENSG00000214413	BBIP1	0.576844	3.12715e-07	1.17867e-06
ENSG00000059691	GATB	0.576775	6.54695e-15	4.17912e-14
ENSG00000186073	C15orf41	0.576701	2.30514e-07	8.79819e-07
ENSG00000213722	DDAH2	0.576232	1.85828e-07	7.17885e-07
ENSG00000171148	TADA3	0.575791	1.44599e-40	2.93576e-39
ENSG00000019144	PHLDB1	0.575748	2.19346e-30	2.97108e-29
ENSG00000100320	RBFOX2	0.575663	3.05786e-41	6.43512e-40
ENSG00000157514	TSC22D3	0.575507	6.18739e-17	4.39048e-16
ENSG00000169981	ZNF35	0.575252	1.27923e-09	5.83319e-09
ENSG00000151445	VIPAS39	0.57512	4.49395e-11	2.28604e-10
ENSG00000102804	TSC22D1	0.574717	1.41975e-58	5.49853e-57
ENSG00000117153	KLHL12	0.574436	1.45515e-17	1.07389e-16
ENSG00000196961	AP2A1	0.574369	1.63232e-26	1.89138e-25
ENSG00000275066	SYNRG	0.574227	1.37678e-18	1.07501e-17
ENSG00000086102	NFX1	0.574119	4.86037e-39	9.41187e-38
ENSG00000163536	SERPINI1	0.573694	2.61859e-08	1.08676e-07
ENSG00000243477	NAT6	0.573692	2.71218e-07	1.02857e-06
ENSG00000132128	LRRC41	0.573639	1.14083e-27	1.39557e-26
ENSG00000103353	UBFD1	0.573149	1.8023e-46	4.64692e-45
ENSG00000124067	SLC12A4	0.572619	5.04279e-22	4.65285e-21
ENSG00000107745	MICU1	0.5725	6.65483e-25	7.15763e-24
ENSG00000183354	KIAA2026	0.572471	1.38044e-15	9.13764e-15
ENSG00000058668	ATP2B4	0.5717	1.27616e-38	2.4154e-37
ENSG00000196998	WDR45	0.571343	7.27283e-16	4.89839e-15
ENSG00000125753	VASP	0.5713	3.68786e-39	7.17906e-38
ENSG00000156603	MED19	0.570917	3.52325e-06	1.20213e-05
ENSG00000101997	CCDC22	0.570622	1.67026e-08	7.0525e-08
ENSG00000113194	FAF2	0.570442	8.35891e-45	2.03562e-43
ENSG00000076201	PTPN23	0.569603	6.37944e-23	6.14733e-22
ENSG00000197860	SGTB	0.569577	1.01308e-14	6.40468e-14
ENSG00000118193	KIF14	0.569431	1.64893e-35	2.71654e-34
ENSG00000163481	RNF25	0.569249	3.18727e-15	2.07184e-14
ENSG00000119801	YPEL5	0.568668	5.09044e-05	0.000154498
ENSG00000170634	ACYP2	0.5685	0.00694937	0.0159046
ENSG00000125731	SH2D3A	0.568186	6.56185e-06	2.17842e-05
ENSG00000241978	AKAP2	0.567941	2.70424e-56	9.81353e-55
ENSG00000278384	AL354822.1	0.567824	0.0110512	0.0244045
ENSG00000168556	ING2	0.567813	5.07686e-06	1.70477e-05
ENSG00000184117	NIPSNAP1	0.567354	2.84748e-20	2.42016e-19
ENSG00000161513	FDXR	0.567351	9.47591e-05	0.000280219
ENSG00000124733	MEA1	0.566871	5.28055e-26	5.99797e-25
ENSG00000234062	RP11-308D16.2	0.566799	0.0191426	0.0404092
ENSG00000215421	ZNF407	0.566197	1.17874e-09	5.40413e-09
ENSG00000076108	BAZ2A	0.565237	1.77604e-31	2.52245e-30
ENSG00000125447	GGA3	0.564774	7.63624e-20	6.34403e-19
ENSG00000182993	C12orf60	0.564501	0.0105306	0.0233498
ENSG00000091947	TMEM101	0.564398	4.57336e-14	2.77518e-13
ENSG00000213918	DNASE1	0.564088	2.34834e-06	8.15286e-06
ENSG00000099875	MKNK2	0.563772	2.23027e-15	1.46369e-14
ENSG00000198879	SFMBT2	0.563469	1.39524e-11	7.35311e-11
ENSG00000110841	PPFIBP1	0.56344	8.77147e-23	8.38269e-22
ENSG00000249967	RP11-548K23.11	0.563254	0.0209253	0.0438361
ENSG00000109016	DHRS7B	0.562998	1.26443e-06	4.52264e-06
ENSG00000139767	SRRM4	0.562959	0.0136031	0.0295027
ENSG00000179912	R3HDM2	0.562548	8.07584e-09	3.48579e-08
ENSG00000103199	ZNF500	0.562385	2.59016e-06	8.96032e-06
ENSG00000126878	AIF1L	0.56194	1.5473e-05	4.9556e-05
ENSG00000107290	SETX	0.561937	1.01372e-42	2.24076e-41
ENSG00000100918	REC8	0.561841	0.0156189	0.0334613
ENSG00000243024	RPS11P6	0.561797	0.0225218	0.0469246
ENSG00000170917	NUDT6	0.561638	7.49666e-05	0.000223481
ENSG00000138036	DYNC2LI1	0.561388	0.000596555	0.00160197
ENSG00000180304	OAZ2	0.5611	4.52383e-18	3.42071e-17
ENSG00000100342	APOL1	0.560933	0.00420925	0.0100242
ENSG00000132692	BCAN	0.560894	0.00819422	0.01851
ENSG00000092330	TINF2	0.56073	3.29624e-13	1.90609e-12
ENSG00000137404	NRM	0.560671	1.54529e-14	9.66658e-14
ENSG00000172409	CLP1	0.560506	2.61599e-07	9.93322e-07
ENSG00000125779	PANK2	0.560402	4.95183e-11	2.50995e-10
ENSG00000214078	CPNE1	0.560119	5.95937e-34	9.38181e-33
ENSG00000147689	FAM83A	0.560043	5.49596e-07	2.03257e-06
ENSG00000132478	UNK	0.559971	2.6554e-11	1.37198e-10
ENSG00000160360	GPSM1	0.559502	1.58013e-06	5.58791e-06
ENSG00000131100	ATP6V1E1	0.559247	1.47402e-23	1.47762e-22
ENSG00000221829	FANCG	0.559183	1.48601e-27	1.80228e-26
ENSG00000163131	CTSS	0.558229	0.0126678	0.0276663
ENSG00000176473	WDR25	0.558176	1.84341e-05	5.86119e-05
ENSG00000187742	SECISBP2	0.557836	2.46027e-11	1.27402e-10
ENSG00000130311	DDA1	0.557783	1.73725e-16	1.2122e-15
ENSG00000156265	MAP3K7CL	0.557755	0.0168729	0.0359594
ENSG00000174370	C11orf45	0.557196	0.0148865	0.0320412
ENSG00000168610	STAT3	0.556779	5.42206e-50	1.6253e-48
ENSG00000149782	PLCB3	0.556674	1.68007e-29	2.20913e-28
ENSG00000166821	PEX11A	0.55629	0.000335969	0.000931648
ENSG00000078098	FAP	0.555821	3.44817e-06	1.17738e-05
ENSG00000085982	USP40	0.555812	3.98381e-21	3.53595e-20
ENSG00000014164	ZC3H3	0.555702	1.14697e-10	5.65814e-10
ENSG00000101115	SALL4	0.55561	0.000291442	0.000813433
ENSG00000137944	KYAT3	0.555492	5.34697e-07	1.98014e-06
ENSG00000101940	WDR13	0.555447	2.0837e-18	1.6106e-17
ENSG00000076248	UNG	0.554893	7.81731e-26	8.78733e-25
ENSG00000213185	FAM24B	0.554414	0.00343216	0.00829252
ENSG00000186130	ZBTB6	0.553775	3.018e-10	1.44399e-09
ENSG00000145287	PLAC8	0.553499	1.67036e-07	6.47729e-07
ENSG00000198663	C6orf89	0.553463	4.02192e-27	4.79897e-26
ENSG00000181026	AEN	0.553408	3.12982e-29	4.08338e-28
ENSG00000109103	UNC119	0.5532	5.32765e-08	2.15243e-07
ENSG00000173559	NABP1	0.552484	4.37127e-12	2.38345e-11
ENSG00000143393	PI4KB	0.552341	1.14726e-24	1.22041e-23
ENSG00000171988	JMJD1C	0.552286	2.91848e-20	2.47696e-19
ENSG00000025434	NR1H3	0.552231	1.56482e-06	5.538e-06
ENSG00000167549	CORO6	0.552034	0.00143515	0.00367049
ENSG00000196544	BORCS6	0.551943	0.00138574	0.00355153
ENSG00000162341	TPCN2	0.55148	1.26097e-12	7.06779e-12
ENSG00000183666	GUSBP1	0.551408	1.21586e-10	5.98833e-10
ENSG00000171720	HDAC3	0.551208	1.63677e-29	2.15527e-28
ENSG00000167601	AXL	0.550365	1.93148e-66	9.34565e-65
ENSG00000198796	ALPK2	0.549857	5.41594e-21	4.78175e-20
ENSG00000189171	S100A13	0.54941	1.85912e-16	1.29527e-15
ENSG00000161526	SAP30BP	0.549103	7.23131e-21	6.32397e-20
ENSG00000243667	WDR92	0.548765	5.95849e-07	2.19414e-06
ENSG00000172046	USP19	0.547958	2.37687e-32	3.48866e-31
ENSG00000135315	CEP162	0.547922	1.57714e-07	6.1274e-07
ENSG00000133639	BTG1	0.547201	3.51028e-14	2.14919e-13
ENSG00000167637	ZNF283	0.547125	6.57605e-07	2.41493e-06
ENSG00000170175	CHRNB1	0.546947	0.00438781	0.0104172
ENSG00000100577	GSTZ1	0.546305	6.57488e-05	0.00019699
ENSG00000173273	TNKS	0.546199	4.29171e-22	3.98176e-21
ENSG00000152422	XRCC4	0.545523	3.64146e-07	1.36582e-06
ENSG00000108389	MTMR4	0.545456	7.7674e-24	7.89807e-23
ENSG00000165898	ISCA2	0.545388	2.47722e-05	7.77981e-05
ENSG00000226232	RP11-419C5.2	0.545282	0.00962705	0.0214834
ENSG00000150593	PDCD4	0.544901	2.22133e-28	2.78763e-27
ENSG00000100239	PPP6R2	0.544582	2.05506e-16	1.42586e-15
ENSG00000126461	SCAF1	0.544551	3.81917e-14	2.33057e-13
ENSG00000006695	COX10	0.544427	1.91208e-14	1.18804e-13
ENSG00000224126	UBE2SP2	0.543847	5.94422e-06	1.98159e-05
ENSG00000147383	NSDHL	0.543641	7.68452e-20	6.38127e-19
ENSG00000146063	TRIM41	0.542984	2.28329e-16	1.58124e-15
ENSG00000103051	COG4	0.542778	2.7186e-24	2.8379e-23
ENSG00000109107	ALDOC	0.542149	0.000329232	0.000914277
ENSG00000126775	ATG14	0.541165	4.74058e-09	2.07633e-08
ENSG00000170469	SPATA24	0.541107	0.00418711	0.00997536
ENSG00000135451	TROAP	0.540884	4.42686e-21	3.91974e-20
ENSG00000127663	KDM4B	0.540532	1.67356e-08	7.06484e-08
ENSG00000167700	MFSD3	0.540509	8.6959e-07	3.1588e-06
ENSG00000054965	FAM168A	0.54024	4.63217e-23	4.50153e-22
ENSG00000154040	CABYR	0.539889	0.0233671	0.0485378
ENSG00000143368	SF3B4	0.539754	1.13152e-30	1.54859e-29
ENSG00000067082	KLF6	0.539673	2.50624e-43	5.71813e-42
ENSG00000153071	DAB2	0.53948	5.02658e-48	1.39346e-46
ENSG00000101966	XIAP	0.539443	2.5382e-19	2.05588e-18
ENSG00000136213	CHST12	0.53942	1.27588e-06	4.56008e-06
ENSG00000100097	LGALS1	0.539281	3.8472e-32	5.59772e-31
ENSG00000203722	RAET1G	0.538712	2.72184e-07	1.03203e-06
ENSG00000163072	NOSTRIN	0.538671	0.00722501	0.0164924
ENSG00000179454	KLHL28	0.538465	8.86089e-06	2.90866e-05
ENSG00000088682	COQ9	0.538305	2.5512e-21	2.27755e-20
ENSG00000047578	KIAA0556	0.538125	1.0175e-11	5.3979e-11
ENSG00000141551	CSNK1D	0.538051	1.27477e-37	2.32217e-36
ENSG00000049883	PTCD2	0.53767	1.74331e-13	1.02252e-12
ENSG00000095066	HOOK2	0.536979	0.00044092	0.00120426
ENSG00000100083	GGA1	0.536651	2.87891e-12	1.58663e-11
ENSG00000166949	SMAD3	0.536119	5.81529e-31	8.09094e-30
ENSG00000142227	EMP3	0.535951	1.27176e-21	1.15265e-20
ENSG00000171914	TLN2	0.53586	7.97102e-20	6.60134e-19
ENSG00000177051	FBXO46	0.535756	2.12607e-07	8.14679e-07
ENSG00000145016	RUBCN	0.535474	6.02841e-12	3.25524e-11
ENSG00000163535	SGO2	0.53519	2.49089e-18	1.91411e-17
ENSG00000204070	SYS1	0.535107	2.13048e-12	1.18228e-11
ENSG00000197150	ABCB8	0.535058	1.01541e-09	4.6786e-09
ENSG00000137312	FLOT1	0.534863	3.11686e-42	6.79991e-41
ENSG00000171456	ASXL1	0.5347	3.03557e-33	4.6402e-32
ENSG00000155729	KCTD18	0.534554	7.68401e-05	0.000228807
ENSG00000147471	PROSC	0.534327	3.78048e-11	1.93431e-10
ENSG00000135924	DNAJB2	0.534063	3.33549e-17	2.41705e-16
ENSG00000063761	ADCK1	0.534025	0.000320147	0.000890452
ENSG00000273559	CWC25	0.533991	3.04108e-10	1.45428e-09
ENSG00000147124	ZNF41	0.533348	2.50315e-10	1.2039e-09
ENSG00000121988	ZRANB3	0.533065	0.000266364	0.000746379
ENSG00000177311	ZBTB38	0.532942	3.58091e-48	1.00173e-46
ENSG00000010292	NCAPD2	0.532826	5.43243e-62	2.33442e-60
ENSG00000196455	PIK3R4	0.532186	1.69548e-17	1.24925e-16
ENSG00000131018	SYNE1	0.532127	2.66241e-11	1.37522e-10
ENSG00000158796	DEDD	0.531696	2.48067e-14	1.53101e-13
ENSG00000152049	KCNE4	0.531684	0.0236279	0.0490188
ENSG00000099917	MED15	0.531629	8.13086e-23	7.79471e-22
ENSG00000239382	ALKBH6	0.53136	4.96867e-05	0.000150952
ENSG00000099377	HSD3B7	0.531052	1.44484e-06	5.12913e-06
ENSG00000130758	MAP3K10	0.53104	0.00108281	0.0028119
ENSG00000126106	TMEM53	0.530798	0.0139668	0.0302169
ENSG00000149346	SLX4IP	0.530773	0.00428547	0.0101886
ENSG00000099203	TMED1	0.529926	1.03012e-08	4.41736e-08
ENSG00000128891	C15orf57	0.529855	5.40369e-08	2.18219e-07
ENSG00000110906	KCTD10	0.529706	2.48411e-25	2.73237e-24
ENSG00000096093	EFHC1	0.529657	1.27397e-08	5.42269e-08
ENSG00000115661	STK16	0.529649	1.03228e-08	4.42457e-08
ENSG00000143382	ADAMTSL4	0.529646	0.0030522	0.00744178
ENSG00000118096	IFT46	0.529263	3.12488e-06	1.07176e-05
ENSG00000101213	PTK6	0.529088	0.00338443	0.00818685
ENSG00000198466	ZNF587	0.529002	8.04389e-11	4.00024e-10
ENSG00000166881	NEMP1	0.527476	1.60645e-20	1.38065e-19
ENSG00000095139	ARCN1	0.527434	1.02421e-40	2.09559e-39
ENSG00000124702	KLHDC3	0.527311	1.02123e-22	9.74955e-22
ENSG00000172346	CSDC2	0.527248	1.5906e-06	5.62384e-06
ENSG00000102401	ARMCX3	0.526831	3.65638e-17	2.64646e-16
ENSG00000135090	TAOK3	0.526779	5.36566e-07	1.98666e-06
ENSG00000167110	GOLGA2	0.526766	9.16002e-35	1.47997e-33
ENSG00000161558	TMEM143	0.52613	0.00189737	0.0047628
ENSG00000242689	CNTF	0.52603	0.019458	0.0410186
ENSG00000125651	GTF2F1	0.526025	1.81514e-25	2.00371e-24
ENSG00000095303	PTGS1	0.525889	0.00488984	0.0115127
ENSG00000112367	FIG4	0.525879	4.16218e-06	1.41099e-05
ENSG00000076924	XAB2	0.525269	8.5739e-12	4.57746e-11
ENSG00000169429	CXCL8	0.525239	0.0127637	0.0278527
ENSG00000040633	PHF23	0.525139	5.78913e-21	5.1039e-20
ENSG00000088305	DNMT3B	0.524975	7.98363e-06	2.63194e-05
ENSG00000237649	KIFC1	0.524742	1.15852e-24	1.23168e-23
ENSG00000100461	RBM23	0.523835	1.91033e-28	2.40061e-27
ENSG00000146066	HIGD2A	0.522997	4.9395e-14	2.9944e-13
ENSG00000083838	ZNF446	0.521865	0.00413401	0.00985395
ENSG00000120656	TAF12	0.521607	1.64774e-08	6.95902e-08
ENSG00000084112	SSH1	0.520702	2.13246e-22	2.00674e-21
ENSG00000121895	TMEM156	0.52047	4.73285e-06	1.59448e-05
ENSG00000087303	NID2	0.519492	0.00241853	0.00598624
ENSG00000056586	RC3H2	0.519137	2.33386e-38	4.35913e-37
ENSG00000107829	FBXW4	0.519033	2.32556e-05	7.32473e-05
ENSG00000094916	CBX5	0.518043	2.46573e-47	6.54982e-46
ENSG00000109511	ANXA10	0.517558	9.68692e-07	3.50016e-06
ENSG00000164609	SLU7	0.517241	2.57423e-15	1.68583e-14
ENSG00000075826	SEC31B	0.517228	0.00876122	0.0196991
ENSG00000189221	MAOA	0.517069	0.0123617	0.0270363
ENSG00000182446	NPLOC4	0.517045	4.14027e-44	9.78537e-43
ENSG00000144597	EAF1	0.51696	1.90073e-15	1.24964e-14
ENSG00000095383	TBC1D2	0.516562	1.08299e-17	8.05041e-17
ENSG00000136161	RCBTB2	0.516438	0.00456945	0.0108164
ENSG00000161896	IP6K3	0.515869	0.00320051	0.0077828
ENSG00000090020	SLC9A1	0.515825	7.40333e-11	3.69365e-10
ENSG00000143621	ILF2	0.515161	1.1926e-45	2.97908e-44
ENSG00000214485	RPL7P1	0.514751	0.00308277	0.00751134
ENSG00000138629	UBL7	0.514338	3.91929e-17	2.82787e-16
ENSG00000064490	RFXANK	0.514192	5.29709e-12	2.86958e-11
ENSG00000050327	ARHGEF5	0.51383	3.45855e-07	1.29986e-06
ENSG00000128563	PRKRIP1	0.51381	3.17181e-10	1.51522e-09
ENSG00000122741	DCAF10	0.513543	4.77401e-20	4.00769e-19
ENSG00000180881	CAPS2	0.513177	0.0205081	0.0430209
ENSG00000130475	FCHO1	0.513061	0.0171036	0.0363968
ENSG00000133083	DCLK1	0.513032	0.00551831	0.0128723
ENSG00000170899	GSTA4	0.512619	0.00514245	0.0120612
ENSG00000174720	LARP7	0.512369	2.61221e-14	1.61165e-13
ENSG00000105929	ATP6V0A4	0.5123	0.0225834	0.0470424
ENSG00000128886	ELL3	0.511362	0.0151055	0.0324595
ENSG00000118960	HS1BP3	0.511167	5.34666e-05	0.000161822
ENSG00000166275	BORCS7	0.510093	5.56095e-05	0.000168059
ENSG00000120333	MRPS14	0.510035	8.40962e-10	3.90016e-09
ENSG00000117475	BLZF1	0.509863	1.03694e-10	5.12629e-10
ENSG00000205765	C5orf51	0.509833	9.16216e-29	1.17376e-27
ENSG00000165675	ENOX2	0.509618	2.87355e-07	1.08709e-06
ENSG00000119401	TRIM32	0.509379	1.70235e-11	8.92316e-11
ENSG00000266173	STRADA	0.50937	1.78542e-09	8.05932e-09
ENSG00000274879	RP11-411G2.1	0.509222	0.0107432	0.0237785
ENSG00000262664	OVCA2	0.508781	2.23465e-07	8.54509e-07
ENSG00000167566	NCKAP5L	0.508557	9.09791e-12	4.8432e-11
ENSG00000157064	NMNAT2	0.508263	0.00677513	0.0155328
ENSG00000143258	USP21	0.507993	1.0959e-09	5.03655e-09
ENSG00000171606	ZNF274	0.507278	1.27455e-08	5.42389e-08
ENSG00000140382	HMG20A	0.506856	4.77019e-15	3.06512e-14
ENSG00000136908	DPM2	0.506632	5.88064e-24	6.0261e-23
ENSG00000068394	GPKOW	0.506498	6.12157e-12	3.30167e-11
ENSG00000160285	LSS	0.506488	2.61279e-23	2.5799e-22
ENSG00000275740	RP11-449H3.3	0.506121	8.41942e-07	3.06199e-06
ENSG00000180357	ZNF609	0.506099	2.51693e-34	4.00688e-33
ENSG00000162946	DISC1	0.50589	0.00541398	0.012645
ENSG00000143630	HCN3	0.505713	0.00500491	0.0117686
ENSG00000198700	IPO9	0.505414	3.62572e-47	9.56157e-46
ENSG00000143155	TIPRL	0.505282	2.54706e-19	2.06214e-18
ENSG00000134452	FBXO18	0.505257	2.53447e-17	1.84603e-16
ENSG00000213780	GTF2H4	0.5051	2.28305e-10	1.10149e-09
ENSG00000152443	ZNF776	0.504936	3.13081e-06	1.07339e-05
ENSG00000160691	SHC1	0.504693	1.80801e-53	6.04913e-52
ENSG00000156253	RWDD2B	0.504217	1.84173e-08	7.73576e-08
ENSG00000167797	CDK2AP2	0.50389	4.63596e-11	2.35502e-10
ENSG00000179134	SAMD4B	0.503431	3.86042e-27	4.61523e-26
ENSG00000111319	SCNN1A	0.503143	0.000579044	0.00155721
ENSG00000142546	NOSIP	0.50307	6.62812e-12	3.56549e-11
ENSG00000151364	KCTD14	0.50306	0.00337988	0.00817736
ENSG00000166407	LMO1	0.502733	0.000973592	0.00254476
ENSG00000204859	ZBTB48	0.502562	1.97928e-07	7.62072e-07
ENSG00000143845	ETNK2	0.502312	0.0200029	0.0420663
ENSG00000243749	TMEM35B	0.502266	0.00753892	0.0171602
ENSG00000120913	PDLIM2	0.502143	5.91376e-06	1.97215e-05
ENSG00000145934	TENM2	0.502056	3.66912e-08	1.50546e-07
ENSG00000216775	RP1-152L7.5	0.501777	0.0135886	0.0294794
ENSG00000126215	XRCC3	0.501593	4.89179e-06	1.64622e-05
ENSG00000174938	SEZ6L2	0.501245	3.09391e-07	1.16662e-06
ENSG00000165983	PTER	0.501207	1.55723e-06	5.51327e-06
ENSG00000109270	LAMTOR3	0.501167	8.12029e-10	3.76882e-09
ENSG00000167740	CYB5D2	0.501126	0.00344451	0.00831909
ENSG00000143384	MCL1	0.500834	1.13317e-38	2.15361e-37
ENSG00000036054	TBC1D23	0.500757	2.64442e-10	1.2692e-09
[truncated: 6,902 more rows]
