# Supplementary material for: The MYB-related transcription factor MYPOP acts as a selective regulator of cancer cell growth
Source: Research Square preprint supplement (doi:10.21203/rs.3.rs-3673301/v1), 2024-03-05
Supplement: Supplementary file 3 [file 99e4ce041b2e4c8318df28d9.xlsx]

## Sheet: Supplementary Table 4
Supplementary Table 4: NHEK RNA-Seq 6h post mRNA transfection
ENSEMBL ID	Gene symbol	Log2 fold change	P-value	Adjusted p-value
ENSG00000274276	CBSL	9.18744	3.52734e-10	9.17575e-07
ENSG00000253488	FAM60DP	6.07998	1.56074e-06	0.000540869
ENSG00000236523	NPM1P40	4.75733	2.67762e-08	2.0512e-05
ENSG00000165478	HEPACAM	4.174	0.000138297	0.0197763
ENSG00000118972	FGF23	3.64166	6.42375e-16	9.34977e-12
ENSG00000130032	PRRG3	3.52642	5.13196e-13	3.73478e-09
ENSG00000171532	NEUROD2	3.12503	1.09322e-06	0.000441996
ENSG00000150625	GPM6A	2.7471	9.65225e-08	5.40341e-05
ENSG00000163884	KLF15	2.69639	0.000399729	0.0427798
ENSG00000225972	MTND1P23	2.39756	2.16834e-08	1.75334e-05
ENSG00000123700	KCNJ2	1.91503	0.000334631	0.0368981
ENSG00000187942	LDLRAD2	1.78524	0.00018524	0.0247175
ENSG00000165507	C10orf10	1.76995	0.000124095	0.0184307
ENSG00000164400	CSF2	1.64163	6.64622e-05	0.0113217
ENSG00000164241	C5orf63	1.46556	8.46309e-08	5.40341e-05
ENSG00000212724	KRTAP2-3	1.46368	5.84457e-05	0.0103741
ENSG00000160221	C21orf33	1.33243	2.29585e-05	0.00498747
ENSG00000162892	IL24	1.28195	8.9742e-08	5.40341e-05
ENSG00000104490	NCALD	1.24359	0.000192002	0.0247175
ENSG00000144834	TAGLN3	1.20285	0.00041471	0.0440592
ENSG00000171916	LGALS9C	1.0596	2.09322e-08	1.75334e-05
ENSG00000261052	SULT1A3	0.971388	0.000306727	0.0348782
ENSG00000165799	RNASE7	0.963019	1.10057e-05	0.00266979
ENSG00000166526	ZNF3	0.942922	7.41763e-06	0.00196298
ENSG00000167767	KRT80	0.891184	0.000296919	0.0340287
ENSG00000114268	PFKFB4	0.888896	3.78252e-10	9.17575e-07
ENSG00000087495	PHACTR3	0.720289	2.34715e-06	0.000759173
ENSG00000028277	POU2F2	0.552029	0.000345703	0.0378324
ENSG00000283253	AL031664.1	0.0263855	0.000459978	0.0471477
ENSG00000260212	RP11-325O24.5	0.00488811	1.18092e-05	0.0027723
ENSG00000137936	BCAR3	-0.390674	0.000210735	0.0262158
ENSG00000076003	MCM6	-0.428226	0.000135628	0.0197427
ENSG00000170345	FOS	-0.478606	0.000202303	0.0256045
ENSG00000103365	GGA2	-0.498021	7.67956e-05	0.0122831
ENSG00000066027	PPP2R5A	-0.498661	0.000440758	0.0464872
ENSG00000165480	SKA3	-0.503531	4.60065e-05	0.00858494
ENSG00000175931	UBE2O	-0.50705	0.000234648	0.0285519
ENSG00000110092	CCND1	-0.518279	0.000320622	0.0360699
ENSG00000160294	MCM3AP	-0.538814	0.00016058	0.0226916
ENSG00000132613	MTSS1L	-0.557851	3.82491e-05	0.00762623
ENSG00000106459	NRF1	-0.563808	0.000451332	0.046803
ENSG00000160271	RALGDS	-0.574639	0.000164784	0.0230618
ENSG00000178726	THBD	-0.577812	0.000169065	0.0234357
ENSG00000120833	SOCS2	-0.594004	0.000191382	0.0247175
ENSG00000008710	PKD1	-0.597319	3.96499e-05	0.00769472
ENSG00000058729	RIOK2	-0.599289	5.93696e-05	0.0104111
ENSG00000110583	NAA40	-0.606769	4.49552e-05	0.0084977
ENSG00000121039	RDH10	-0.607196	0.000450389	0.046803
ENSG00000132716	DCAF8	-0.607326	3.37222e-06	0.00100169
ENSG00000180346	TIGD2	-0.610991	0.000329533	0.0366134
ENSG00000226887	ERVMER34-1	-0.617311	5.83371e-05	0.0103741
ENSG00000066583	ISOC1	-0.620754	6.76735e-05	0.0113217
ENSG00000121210	KIAA0922	-0.630294	0.000138591	0.0197763
ENSG00000174136	RGMB	-0.659295	8.64915e-05	0.0136835
ENSG00000196700	ZNF512B	-0.666313	2.95316e-06	0.000895483
ENSG00000153885	KCTD15	-0.67103	0.000108562	0.0165805
ENSG00000181220	ZNF746	-0.672483	8.40005e-06	0.00214496
ENSG00000189319	FAM53B	-0.67652	2.50803e-06	0.00077669
ENSG00000124226	RNF114	-0.678116	1.54223e-06	0.000540869
ENSG00000135750	KCNK1	-0.693631	1.37799e-05	0.00313385
ENSG00000144355	DLX1	-0.696856	0.000172507	0.0236872
ENSG00000011198	ABHD5	-0.697589	9.24405e-05	0.0144674
ENSG00000160094	ZNF362	-0.706375	0.000209262	0.0262158
ENSG00000171517	LPAR3	-0.70698	0.000192607	0.0247175
ENSG00000100479	POLE2	-0.717251	0.00023736	0.0285519
ENSG00000111802	TDP2	-0.718158	3.78557e-06	0.00110198
ENSG00000043143	JADE2	-0.71909	1.1809e-06	0.000455657
ENSG00000269897	COMMD3-BMI1	-0.724353	0.000322164	0.0360699
ENSG00000143157	POGK	-0.72509	6.71228e-05	0.0113217
ENSG00000110042	DTX4	-0.726182	1.83732e-06	0.000607778
ENSG00000164649	CDCA7L	-0.726709	7.03859e-07	0.000301314
ENSG00000119669	IRF2BPL	-0.730205	2.42389e-06	0.000766952
ENSG00000138002	IFT172	-0.73261	1.09543e-05	0.00266979
ENSG00000181751	C5orf30	-0.734445	0.000109359	0.0165805
ENSG00000244405	ETV5	-0.736697	9.5625e-08	5.40341e-05
ENSG00000022567	SLC45A4	-0.752978	0.00017754	0.0241504
ENSG00000168502	MTCL1	-0.756129	0.000188114	0.0247175
ENSG00000197852	FAM212B	-0.776995	0.000220011	0.0271378
ENSG00000162413	KLHL21	-0.803192	1.63596e-09	2.83616e-06
ENSG00000187210	GCNT1	-0.817905	1.67672e-06	0.000567549
ENSG00000144749	LRIG1	-0.826016	5.69903e-05	0.0103687
ENSG00000147130	ZMYM3	-0.828154	1.43581e-08	1.39321e-05
ENSG00000170113	NIPA1	-0.83322	0.000240271	0.0286651
ENSG00000135766	EGLN1	-0.863587	3.89659e-05	0.00766417
ENSG00000165152	TMEM246	-0.867599	1.72508e-07	9.29948e-05
ENSG00000079156	OSBPL6	-0.868608	7.22393e-05	0.0117984
ENSG00000128694	OSGEPL1	-0.868853	6.94575e-05	0.0114881
ENSG00000008513	ST3GAL1	-0.874711	1.24215e-06	0.000463576
ENSG00000150455	TIRAP	-0.882822	0.000236453	0.0285519
ENSG00000229544	NKX1-2	-0.883187	3.21023e-05	0.00667498
ENSG00000168621	GDNF	-0.887724	0.000286795	0.0331294
ENSG00000178409	BEND3	-0.897378	1.18962e-06	0.000455657
ENSG00000185875	THNSL1	-0.939698	0.00038334	0.0413297
ENSG00000133111	RFXAP	-0.940543	0.000371294	0.0403297
ENSG00000169255	B3GALNT1	-0.94969	8.1384e-06	0.00211526
ENSG00000144791	LIMD1	-0.95	9.50507e-08	5.40341e-05
ENSG00000112365	ZBTB24	-0.95511	1.29825e-05	0.00299937
ENSG00000127337	YEATS4	-0.955659	4.8881e-08	3.55731e-05
ENSG00000180011	ZADH2	-0.959547	5.96857e-09	7.8975e-06
ENSG00000170456	DENND5B	-0.969589	0.000469041	0.0477405
ENSG00000076351	SLC46A1	-0.970472	1.13598e-05	0.00271052
ENSG00000178573	MAF	-0.973278	0.000250541	0.0294083
ENSG00000185551	NR2F2	-0.981453	8.49566e-07	0.000353298
ENSG00000136444	RSAD1	-0.982239	7.01472e-06	0.00189073
ENSG00000158966	CACHD1	-0.982467	0.000453399	0.046803
ENSG00000111432	FZD10	-0.986459	2.4468e-05	0.00523724
ENSG00000150867	PIP4K2A	-0.987951	2.58752e-07	0.000125538
ENSG00000125388	GRK4	-1.00008	0.000135642	0.0197427
ENSG00000168763	CNNM3	-1.00421	0.000245311	0.0290285
ENSG00000101230	ISM1	-1.01084	0.000263182	0.030645
ENSG00000070476	ZXDC	-1.01424	1.94858e-09	2.83616e-06
ENSG00000165030	NFIL3	-1.01444	2.0048e-08	1.75334e-05
ENSG00000166106	ADAMTS15	-1.02722	2.21719e-07	0.000115254
ENSG00000185115	NSMCE3	-1.0292	5.34498e-07	0.000235746
ENSG00000054598	FOXC1	-1.0382	5.00023e-06	0.00139958
ENSG00000147852	VLDLR	-1.06466	6.68963e-05	0.0113217
ENSG00000147324	MFHAS1	-1.07998	9.35021e-09	9.72088e-06
ENSG00000177283	FZD8	-1.08305	4.27593e-05	0.00818898
ENSG00000203761	MSTO2P	-1.08658	3.73364e-05	0.00754765
ENSG00000198945	L3MBTL3	-1.09447	0.00011679	0.0175245
ENSG00000154734	ADAMTS1	-1.11728	2.0908e-05	0.00468179
ENSG00000095203	EPB41L4B	-1.13296	7.07048e-08	4.90051e-05
ENSG00000162407	PLPP3	-1.14789	0.000193596	0.0247175
ENSG00000136158	SPRY2	-1.18548	8.47958e-10	1.76315e-06
ENSG00000186532	SMYD4	-1.18926	5.63692e-06	0.00154803
ENSG00000176399	DMRTA1	-1.24424	3.64864e-05	0.00747972
ENSG00000213839	TMX2P1	-1.27662	7.29547e-05	0.0117984
ENSG00000205189	ZBTB10	-1.30708	0.000190935	0.0247175
ENSG00000125845	BMP2	-1.35738	1.603e-11	5.83293e-08
ENSG00000114790	ARHGEF26	-1.38528	3.30492e-07	0.000155171
ENSG00000167034	NKX3-1	-1.40751	2.15155e-05	0.00474481
ENSG00000183337	BCOR	-1.42972	0.000108268	0.0165805
ENSG00000168661	ZNF30	-1.43604	2.39665e-07	0.000120287
ENSG00000153094	BCL2L11	-1.44256	7.59102e-09	8.49902e-06
ENSG00000152503	TRIM36	-1.44985	2.57588e-05	0.00543362
ENSG00000157240	FZD1	-1.46745	7.2323e-09	8.49902e-06
ENSG00000151233	GXYLT1	-1.51591	1.34038e-06	0.000487732
ENSG00000166016	ABTB2	-1.63131	9.91564e-06	0.00248831
ENSG00000198948	MFAP3L	-1.65704	4.88301e-05	0.00899648
ENSG00000185252	ZNF74	-1.66116	1.20046e-11	5.82425e-08
ENSG00000224287	MSL3P1	-1.74587	1.84337e-09	2.83616e-06
ENSG00000172197	MBOAT1	-1.91664	4.83412e-06	0.00137962
ENSG00000241790	ENO1P4	-7.01191	4.47083e-07	0.000203353
