# Supplementary material for: The MYB-related transcription factor MYPOP acts as a selective regulator of cancer cell growth
Source: Research Square preprint supplement (doi:10.21203/rs.3.rs-3673301/v1), 2024-03-05
Supplement: Supplementary file 4 [file c7b23cf57a4d2708395a096e.xlsx]

## Sheet: Supplementary Table 5
Supplementary Table 5: NHEK RNA-Seq 24h post mRNA transfection
ENSEMBL ID	Gene symbol	Log2 fold change	P-value	Adjusted p-value
ENSG00000254673	RP11-598P20.5	6.82741	9.45833e-07	0.0107031
ENSG00000125740	FOSB	-0.757864	6.21374e-06	0.0234382
ENSG00000170345	FOS	-0.798461	2.01721e-06	0.0121744
ENSG00000185252	ZNF74	-0.958785	2.65174e-06	0.0121744
ENSG00000162772	ATF3	-1.46145	1.77317e-11	4.01304e-07
ENSG00000136244	IL6	-1.59099	2.68964e-06	0.0121744
