# Supplementary material for: The MYB-related transcription factor MYPOP acts as a selective regulator of cancer cell growth
Source: Research Square preprint supplement (doi:10.21203/rs.3.rs-3673301/v1), 2024-03-05
Supplement: Supplementary file 5 [file fecb051fa46609cfcb6ee7f7.xlsx]

## Sheet: Supplementary Table 1
Supplementary Table 1: HeLa RNA-Seq 24h post pDNA transfection
ENSEMBL ID	Gene symbol	Log2 fold change	P-value	Adjusted p-value
ENSG00000162892	IL24	5.0256	9.16618e-06	0.00622569
ENSG00000162891	IL20	4.86783	2.00807e-05	0.00862717
ENSG00000122641	INHBA	3.45666	2.23105e-05	0.00862717
ENSG00000166592	RRAD	3.31498	6.84943e-05	0.0117584
ENSG00000117407	ARTN	3.10776	0.000369494	0.0229389
ENSG00000168427	KLHL30	3.02428	0.00219347	0.0474815
ENSG00000012124	CD22	2.65467	0.00236794	0.0486623
ENSG00000179046	TRIML2	2.53748	2.59672e-05	0.00869568
ENSG00000143217	NECTIN4	2.53149	1.69385e-05	0.00790062
ENSG00000232810	TNF	2.45593	0.000305541	0.0220462
ENSG00000095752	IL11	2.20308	0.000487918	0.0250222
ENSG00000184564	SLITRK6	2.18242	0.0022442	0.0477602
ENSG00000141738	GRB7	2.10362	0.000821239	0.0310256
ENSG00000115008	IL1A	2.04229	0.00181845	0.0439795
ENSG00000234498	RPL13AP20	2.01325	0.00197835	0.0460558
ENSG00000130513	GDF15	1.97427	3.93061e-05	0.00968425
ENSG00000184497	TMEM255B	1.95906	0.00227225	0.048062
ENSG00000281991	TMEM265	1.94842	0.000452692	0.0243596
ENSG00000148677	ANKRD1	1.9028	5.97023e-05	0.0115908
ENSG00000167723	TRPV3	1.8808	0.000776274	0.0310256
ENSG00000124216	SNAI1	1.86085	2.17268e-05	0.00862717
ENSG00000168497	CAVIN2	1.8435	0.000316126	0.0223654
ENSG00000158246	TENT5B	1.82693	3.79066e-05	0.00952038
ENSG00000137094	DNAJB5	1.82411	1.28601e-06	0.00559844
ENSG00000106366	SERPINE1	1.823	5.01758e-06	0.00607165
ENSG00000172927	MYEOV	1.70598	0.000450941	0.0243596
ENSG00000179772	FOXS1	1.59834	0.000206855	0.0191724
ENSG00000144460	NYAP2	1.55254	0.00236634	0.0486623
ENSG00000128510	CPA4	1.54495	0.000141517	0.0159017
ENSG00000179862	CITED4	1.48679	0.000271805	0.0208567
ENSG00000162241	SLC25A45	1.47832	3.74828e-05	0.00952038
ENSG00000187908	DMBT1	1.47783	0.00110398	0.0339248
ENSG00000274049	INO80B-WBP1	1.42897	0.000108229	0.0141347
ENSG00000108691	CCL2	1.42407	4.05113e-05	0.00968425
ENSG00000153233	PTPRR	1.39459	0.00156879	0.0408112
ENSG00000204767	INSYN2B	1.38886	0.000131723	0.0156837
ENSG00000146856	AGBL3	1.31735	0.00213289	0.0471936
ENSG00000100592	DAAM1	1.27878	3.64215e-06	0.00607165
ENSG00000058085	LAMC2	1.27539	0.0015561	0.0407269
ENSG00000132801	ZSWIM3	1.25587	0.000346206	0.0226072
ENSG00000224321	RPL12P14	1.24174	0.00218937	0.0474815
ENSG00000163545	NUAK2	1.22498	0.000149161	0.0163701
ENSG00000005102	MEOX1	1.18211	0.00041295	0.0237583
ENSG00000143507	DUSP10	1.1692	2.34391e-05	0.00862717
ENSG00000128342	LIF	1.14747	0.00120342	0.0356996
ENSG00000168685	IL7R	1.14104	0.000206991	0.0191724
ENSG00000005238	FAM214B	1.12621	0.000465257	0.0246002
ENSG00000169247	SH3TC2	1.0833	0.00175986	0.0432025
ENSG00000125740	FOSB	1.06603	0.00129098	0.0372208
ENSG00000218891	ZNF579	1.03247	0.00114649	0.0347406
ENSG00000189143	CLDN4	1.03144	2.77116e-05	0.00884671
ENSG00000197191	CYSRT1	1.03033	0.000192373	0.0190305
ENSG00000204344	STK19	0.953094	0.00239092	0.0489426
ENSG00000273559	CWC25	0.951514	0.00142701	0.0394204
ENSG00000130517	PGPEP1	0.923109	0.000955633	0.0329104
ENSG00000175592	FOSL1	0.913248	3.48728e-05	0.00952038
ENSG00000184185	KCNJ12	0.890643	7.29276e-05	0.0117584
ENSG00000248905	FMN1	0.851737	0.000387478	0.0230021
ENSG00000185745	IFIT1	0.841003	6.97398e-05	0.0117584
ENSG00000171428	NAT1	0.817909	0.00111463	0.0340914
ENSG00000119922	IFIT2	0.797949	0.000660351	0.0298415
ENSG00000134668	SPOCD1	0.796785	0.00231721	0.0482965
ENSG00000174791	RIN1	0.785716	0.00203871	0.0463859
ENSG00000104881	PPP1R13L	0.78564	0.0023735	0.0486623
ENSG00000091073	DTX2	0.782122	0.00199077	0.0461973
ENSG00000115363	EVA1A	0.773297	0.000703803	0.0302514
ENSG00000099992	TBC1D10A	0.759383	0.000675003	0.0301058
ENSG00000131746	TNS4	0.744086	0.00145235	0.039438
ENSG00000186577	SMIM29	0.734362	0.000779776	0.0310256
ENSG00000240583	AQP1	0.725194	0.00211826	0.0471936
ENSG00000140682	TGFB1I1	0.702949	0.00163806	0.0417832
ENSG00000166851	PLK1	0.687314	2.40457e-06	0.00607165
ENSG00000119917	IFIT3	0.678197	0.000358015	0.02292
ENSG00000065534	MYLK	0.668942	0.00204962	0.0465532
ENSG00000132109	TRIM21	0.655806	0.000707919	0.0302514
ENSG00000183386	FHL3	0.65379	0.000254503	0.0204823
ENSG00000138347	MYPN	0.646542	0.000601699	0.0285752
ENSG00000196754	S100A2	0.646259	0.00130671	0.0372613
ENSG00000064205	CCN5	0.627884	9.69863e-05	0.0134914
ENSG00000130669	PAK4	0.625407	0.000158778	0.0171375
ENSG00000231007	CDC20P1	0.609204	0.00207386	0.0467783
ENSG00000111665	CDCA3	0.604799	7.24203e-05	0.0117584
ENSG00000129195	PIMREG	0.596195	6.62132e-05	0.0117584
ENSG00000198406	BZW1P2	0.588464	0.000767695	0.0310256
ENSG00000179820	MYADM	0.57148	0.00249173	0.0496066
ENSG00000117399	CDC20	0.567356	8.92389e-06	0.00622569
ENSG00000109846	CRYAB	0.565192	0.00186253	0.0446295
ENSG00000162227	TAF6L	0.56159	0.00144267	0.039438
ENSG00000137812	KNL1	0.560005	0.00218586	0.0474815
ENSG00000196196	HRCT1	0.549006	0.00108732	0.0337303
ENSG00000134222	PSRC1	0.545038	0.00112779	0.0343332
ENSG00000204138	PHACTR4	0.538824	0.00232311	0.0482965
ENSG00000160813	PPP1R35	0.537057	0.000813606	0.0310256
ENSG00000115163	CENPA	0.530296	0.00104518	0.0331312
ENSG00000116691	MIIP	0.527305	0.000379241	0.0229389
ENSG00000179941	BBS10	0.524524	0.00121094	0.0356996
ENSG00000112984	KIF20A	0.51847	0.000341327	0.0225035
ENSG00000159251	ACTC1	0.517957	0.000237362	0.0200232
ENSG00000128944	KNSTRN	0.51663	4.82955e-05	0.01034
ENSG00000087586	AURKA	0.515951	6.03502e-05	0.0115908
ENSG00000169136	ATF5	0.514261	0.00201189	0.046266
ENSG00000237649	KIFC1	0.510807	0.00134352	0.0380615
ENSG00000060642	PIGV	0.504494	0.00242543	0.0490507
ENSG00000169679	BUB1	0.502596	8.01047e-05	0.0121647
ENSG00000173456	RNF26	0.501043	0.00153187	0.0402538
ENSG00000068489	PRR11	0.49945	0.000706144	0.0302514
ENSG00000143228	NUF2	0.497198	0.000189636	0.0190305
ENSG00000135114	OASL	0.492749	0.00214286	0.0471936
ENSG00000117650	NEK2	0.491238	9.85113e-05	0.0134914
ENSG00000142910	TINAGL1	0.486698	0.00172446	0.0427372
ENSG00000011426	ANLN	0.486444	4.5613e-05	0.00993977
ENSG00000196923	PDLIM7	0.486352	6.73828e-05	0.0117584
ENSG00000143322	ABL2	0.485697	0.000974152	0.0329104
ENSG00000124145	SDC4	0.480254	0.00240343	0.0489809
ENSG00000137965	IFI44	0.478326	0.000556763	0.0275429
ENSG00000134057	CCNB1	0.477723	2.90056e-05	0.00884671
ENSG00000117877	POLR1G	0.475988	0.00209823	0.0470553
ENSG00000168140	VASN	0.473375	0.000820854	0.0310256
ENSG00000178999	AURKB	0.472032	0.000430523	0.0243596
ENSG00000075218	GTSE1	0.470837	0.000206271	0.0191724
ENSG00000010292	NCAPD2	0.464268	0.000402214	0.0236618
ENSG00000130202	NECTIN2	0.46007	0.000733276	0.0306285
ENSG00000134690	CDCA8	0.457765	0.00104033	0.0331047
ENSG00000149596	JPH2	0.457562	0.0024383	0.0490507
ENSG00000126787	DLGAP5	0.457482	0.000368291	0.0229389
ENSG00000088325	TPX2	0.454633	4.56651e-05	0.00993977
ENSG00000170473	PYM1	0.452668	0.00202785	0.0463814
ENSG00000013810	TACC3	0.45251	0.000231216	0.0199979
ENSG00000137801	THBS1	0.450554	0.00149853	0.0399071
ENSG00000105137	SYDE1	0.441837	0.00144972	0.039438
ENSG00000131652	THOC6	0.43681	0.0010987	0.0339248
ENSG00000137804	NUSAP1	0.435909	0.000339538	0.0225035
ENSG00000117228	GBP1	0.435321	0.000459665	0.0245591
ENSG00000064666	CNN2	0.426045	0.000666035	0.0299287
ENSG00000171552	BCL2L1	0.423452	0.000688044	0.0302514
ENSG00000166272	WBP1L	0.422652	0.00116858	0.0352601
ENSG00000167797	CDK2AP2	0.421629	0.00137145	0.038074
ENSG00000112742	TTK	0.420808	0.00106245	0.0332749
ENSG00000024526	DEPDC1	0.418545	0.000685517	0.0302461
ENSG00000076382	SPAG5	0.415252	0.00136453	0.038074
ENSG00000167767	KRT80	0.413823	6.97148e-05	0.0117584
ENSG00000156970	BUB1B	0.413484	0.000239588	0.0200578
ENSG00000157456	CCNB2	0.411769	0.000271663	0.0208567
ENSG00000138180	CEP55	0.411241	0.000282044	0.0209289
ENSG00000161638	ITGA5	0.410105	0.000370389	0.0229389
ENSG00000159200	RCAN1	0.395243	0.000462193	0.0245591
ENSG00000112983	BRD8	0.385809	0.00150033	0.0399071
ENSG00000161800	RACGAP1	0.380369	0.000385116	0.0230021
ENSG00000109079	TNFAIP1	0.373962	0.000582818	0.0281363
ENSG00000166532	RIMKLB	0.373837	0.000849819	0.031226
ENSG00000089685	BIRC5	0.371139	0.000410096	0.0237583
ENSG00000125753	VASP	0.361692	0.000624849	0.0287343
ENSG00000145386	CCNA2	0.360629	0.000447971	0.0243596
ENSG00000142945	KIF2C	0.359946	0.00223233	0.0476377
ENSG00000137807	KIF23	0.35357	0.00211636	0.0471936
ENSG00000164611	PTTG1	0.34918	0.000826474	0.0310256
ENSG00000072110	ACTN1	0.34818	0.00156346	0.0408112
ENSG00000130164	LDLR	0.347857	0.000890681	0.0316095
ENSG00000089159	PXN	0.347045	0.00177881	0.0435394
ENSG00000111540	RAB5B	0.346918	0.00243041	0.0490507
ENSG00000143553	SNAPIN	0.346512	0.00119126	0.0356783
ENSG00000167553	TUBA1C	0.345215	6.58953e-05	0.0117584
ENSG00000114346	ECT2	0.344933	0.000453245	0.0243596
ENSG00000089693	MLF2	0.337814	0.000972342	0.0329104
ENSG00000184009	ACTG1	0.332827	0.0018845	0.0448297
ENSG00000148180	GSN	0.331548	0.00215756	0.0473576
ENSG00000101335	MYL9	0.327964	0.00148166	0.0398159
ENSG00000213977	TAX1BP3	0.324069	0.00107098	0.0333818
ENSG00000139546	TARBP2	0.322554	0.00239509	0.0489513
ENSG00000166741	NNMT	0.321893	0.000907331	0.0320263
ENSG00000170540	ARL6IP1	0.319765	0.000477297	0.024934
ENSG00000116560	SFPQ	0.308762	0.00135384	0.038074
ENSG00000164054	SHISA5	0.304315	0.00230078	0.0482315
ENSG00000213782	DDX47	0.299361	0.000924689	0.0324635
ENSG00000109805	NCAPG	0.28853	0.00137091	0.038074
ENSG00000004897	CDC27	0.272682	0.00223016	0.0476377
ENSG00000123975	CKS2	0.270187	0.000996716	0.0330404
ENSG00000198901	PRC1	0.269603	0.00237126	0.0486623
ENSG00000143155	TIPRL	0.265241	0.00202388	0.0463716
ENSG00000123146	ADGRE5	0.25928	0.00195351	0.045849
ENSG00000065325	GLP2R	0.255766	0.00234851	0.0486078
ENSG00000162704	ARPC5	0.220632	0.00233137	0.0483297
ENSG00000187109	NAP1L1	-0.223743	0.00145677	0.0394673
ENSG00000080824	HSP90AA1	-0.227337	0.00103769	0.0331047
ENSG00000166508	MCM7	-0.24418	0.0018941	0.0448945
ENSG00000100528	CNIH1	-0.25542	0.00184084	0.0442177
ENSG00000182768	NGRN	-0.256291	0.00191327	0.045185
ENSG00000134352	IL6ST	-0.259055	0.00228944	0.0482259
ENSG00000135829	DHX9	-0.265539	0.00152695	0.0402538
ENSG00000104331	BPNT2	-0.265595	0.00218841	0.0474815
ENSG00000139921	TMX1	-0.274745	0.00152699	0.0402538
ENSG00000129625	REEP5	-0.288226	0.00221411	0.0474815
ENSG00000084733	RAB10	-0.2901	0.00219914	0.0474815
ENSG00000133872	SARAF	-0.297024	0.000677727	0.0301058
ENSG00000159461	AMFR	-0.30152	0.00210055	0.0470553
ENSG00000137770	CTDSPL2	-0.310318	0.00178358	0.0435394
ENSG00000120889	TNFRSF10B	-0.320215	0.0014525	0.039438
ENSG00000065809	FAM107B	-0.330935	0.00184184	0.0442177
ENSG00000132823	OSER1	-0.334225	0.00166687	0.042107
ENSG00000255529	POLR2M	-0.334841	0.000834983	0.0310256
ENSG00000180185	FAHD1	-0.335238	0.00171899	0.0427372
ENSG00000164091	WDR82	-0.337105	0.0010052	0.0331047
ENSG00000167004	PDIA3	-0.340474	0.000276287	0.0208567
ENSG00000169715	MT1E	-0.34049	0.00111093	0.034058
ENSG00000117748	RPA2	-0.342541	0.00149707	0.0399071
ENSG00000189241	TSPYL1	-0.346731	0.00110362	0.0339248
ENSG00000163399	ATP1A1	-0.349475	0.00143811	0.039438
ENSG00000113552	GNPDA1	-0.35222	0.00252752	0.0499386
ENSG00000213551	DNAJC9	-0.353537	0.00144631	0.039438
ENSG00000171421	MRPL36	-0.353995	0.00212946	0.0471936
ENSG00000171208	NETO2	-0.366865	0.00236301	0.0486623
ENSG00000178695	KCTD12	-0.367166	0.000948052	0.0329104
ENSG00000169813	HNRNPF	-0.370527	0.00086884	0.0313155
ENSG00000164244	PRRC1	-0.37117	0.00127743	0.0369916
ENSG00000135069	PSAT1	-0.376858	0.00199151	0.0461973
ENSG00000112118	MCM3	-0.377376	0.00189063	0.044894
ENSG00000113456	RAD1	-0.378655	0.000870812	0.0313155
ENSG00000166598	HSP90B1	-0.379469	0.000257204	0.0204823
ENSG00000102178	UBL4A	-0.379479	0.00247591	0.0495141
ENSG00000170881	RNF139	-0.380766	0.00213763	0.0471936
ENSG00000120159	CAAP1	-0.381921	0.000772101	0.0310256
ENSG00000082781	ITGB5	-0.382764	0.00187324	0.0446432
ENSG00000147854	UHRF2	-0.383444	0.00157182	0.0408112
ENSG00000043093	DCUN1D1	-0.383633	0.00221254	0.0474815
ENSG00000116237	ICMT	-0.386541	0.000261988	0.0206119
ENSG00000170185	USP38	-0.388616	0.00209293	0.0470459
ENSG00000165175	MID1IP1	-0.388823	0.0012554	0.0365973
ENSG00000042429	MED17	-0.390758	0.00116934	0.0352601
ENSG00000176903	PNMA1	-0.390911	0.00136662	0.038074
ENSG00000072415	PALS1	-0.391554	0.00165543	0.0420621
ENSG00000115963	RND3	-0.393428	0.000713432	0.0302514
ENSG00000137502	RAB30	-0.39568	0.00136991	0.038074
ENSG00000034677	RNF19A	-0.39652	0.00179735	0.0437936
ENSG00000125484	GTF3C4	-0.396617	0.000349541	0.0226364
ENSG00000116679	IVNS1ABP	-0.397345	0.00144964	0.039438
ENSG00000158669	GPAT4	-0.400229	0.000806566	0.0310256
ENSG00000173598	NUDT4	-0.401171	0.000747418	0.0309208
ENSG00000112312	GMNN	-0.403488	0.000397804	0.0235082
ENSG00000112096	SOD2	-0.403599	0.000803154	0.0310256
ENSG00000198876	DCAF12	-0.403922	0.00050228	0.0254255
ENSG00000107372	ZFAND5	-0.404876	0.00187302	0.0446432
ENSG00000168092	PAFAH1B2	-0.405073	0.0012075	0.0356996
ENSG00000173575	CHD2	-0.405376	0.0022743	0.048062
ENSG00000036549	ZZZ3	-0.41186	0.00162238	0.0416272
ENSG00000118260	CREB1	-0.412562	0.00186583	0.0446295
ENSG00000143878	RHOB	-0.416204	0.00017848	0.0184996
ENSG00000197771	MCMBP	-0.416672	0.000805408	0.0310256
ENSG00000165506	DNAAF2	-0.41873	0.0022974	0.0482315
ENSG00000005812	FBXL3	-0.42256	0.000567243	0.0278148
ENSG00000107854	TNKS2	-0.422909	0.00104972	0.0331816
ENSG00000101255	TRIB3	-0.423213	0.000849484	0.031226
ENSG00000111802	TDP2	-0.42516	0.00250319	0.0497537
ENSG00000179021	C3orf38	-0.428898	0.00169396	0.0425151
ENSG00000150991	UBC	-0.430602	0.000568648	0.0278148
ENSG00000170633	RNF34	-0.430946	0.0021615	0.0473645
ENSG00000104738	MCM4	-0.432612	0.00243957	0.0490507
ENSG00000103365	GGA2	-0.435399	0.00152591	0.0402538
ENSG00000111817	DSE	-0.437976	0.00129911	0.0372208
ENSG00000145604	SKP2	-0.440459	0.000234943	0.0200232
ENSG00000137492	THAP12	-0.441681	0.000351853	0.0226364
ENSG00000074590	NUAK1	-0.441686	0.00196192	0.0459187
ENSG00000123595	RAB9A	-0.442238	0.00235668	0.0486623
ENSG00000172262	ZNF131	-0.443233	0.000277876	0.0208567
ENSG00000015479	MATR3	-0.443843	7.81185e-05	0.0120027
ENSG00000115902	SLC1A4	-0.443868	0.0016319	0.0417255
ENSG00000057757	PITHD1	-0.445242	0.000781686	0.0310256
ENSG00000162616	DNAJB4	-0.445535	0.000103158	0.0136085
ENSG00000184047	DIABLO	-0.446007	0.00103933	0.0331047
ENSG00000129245	FXR2	-0.446384	0.0009785	0.0329104
ENSG00000116285	ERRFI1	-0.447742	0.000996779	0.0330404
ENSG00000135052	GOLM1	-0.447908	0.000318009	0.0223654
ENSG00000139146	SINHCAF	-0.44902	0.0009027	0.0319492
ENSG00000124226	RNF114	-0.452668	0.000618877	0.028721
ENSG00000109320	NFKB1	-0.455175	0.00232364	0.0482965
ENSG00000111725	PRKAB1	-0.455789	0.00244127	0.0490507
ENSG00000123505	AMD1	-0.456031	0.00126601	0.0368242
ENSG00000172845	SP3	-0.459783	0.00105185	0.0331816
ENSG00000143033	MTF2	-0.460589	0.000981024	0.0329104
ENSG00000168286	THAP11	-0.461302	0.00171449	0.0427315
ENSG00000180008	SOCS4	-0.461384	0.00117776	0.0353598
ENSG00000141682	PMAIP1	-0.462012	0.00080745	0.0310256
ENSG00000184863	RBM33	-0.46212	0.00251435	0.0497537
ENSG00000198642	KLHL9	-0.462584	0.000384082	0.0230021
ENSG00000091542	ALKBH5	-0.46264	0.00148141	0.0398159
ENSG00000198815	FOXJ3	-0.463095	0.00137311	0.038074
ENSG00000134758	RNF138	-0.464167	0.000488788	0.0250222
ENSG00000169926	KLF13	-0.468232	0.00104181	0.0331047
ENSG00000153879	CEBPG	-0.468646	0.00150718	0.0400077
ENSG00000168496	FEN1	-0.470398	0.000116793	0.0146666
ENSG00000160908	ZNF394	-0.472089	0.00226758	0.048062
ENSG00000181915	ADO	-0.47471	0.00130244	0.0372208
ENSG00000138231	DBR1	-0.475416	0.0024819	0.0495141
ENSG00000066422	ZBTB11	-0.475831	0.00224539	0.0477602
ENSG00000172244	C5orf34	-0.478443	0.00159936	0.0413617
ENSG00000116062	MSH6	-0.479882	0.000341732	0.0225035
ENSG00000085840	ORC1	-0.481511	0.00161912	0.0416255
ENSG00000197905	TEAD4	-0.483377	0.00131271	0.0373508
ENSG00000152102	FAM168B	-0.484805	0.00011496	0.0146666
ENSG00000118564	FBXL5	-0.485636	0.000817351	0.0310256
ENSG00000203668	CHML	-0.486659	0.000666864	0.0299287
ENSG00000139874	SSTR1	-0.486949	0.00214784	0.0472236
ENSG00000102241	HTATSF1	-0.488348	0.000598946	0.0285483
ENSG00000112210	RAB23	-0.490043	0.00171031	0.0427315
ENSG00000198964	SGMS1	-0.490621	0.000378984	0.0229389
ENSG00000135801	TAF5L	-0.491139	0.000806607	0.0310256
ENSG00000110514	MADD	-0.493318	0.00175574	0.0432025
ENSG00000139112	GABARAPL1	-0.493737	0.00207257	0.0467783
ENSG00000118900	UBN1	-0.493966	0.000869313	0.0313155
ENSG00000155508	CNOT8	-0.493989	0.000726202	0.0305142
ENSG00000213626	LBH	-0.494603	0.000861494	0.0313155
ENSG00000173933	RBM4	-0.494637	0.000335029	0.0225035
ENSG00000120158	RCL1	-0.495539	0.00208165	0.046873
ENSG00000065911	MTHFD2	-0.497306	0.00019826	0.0191724
ENSG00000131669	NINJ1	-0.498647	0.00200094	0.046266
ENSG00000153885	KCTD15	-0.499792	0.00113574	0.0344949
ENSG00000174276	ZNHIT2	-0.501389	0.0018126	0.0439194
ENSG00000180917	CMTR2	-0.502633	0.00133175	0.0378102
ENSG00000130844	ZNF331	-0.502942	0.00216937	0.0474573
ENSG00000170779	CDCA4	-0.50696	0.00103487	0.0331047
ENSG00000111276	CDKN1B	-0.508348	0.000750527	0.0309208
ENSG00000165806	CASP7	-0.510828	0.00167443	0.0422162
ENSG00000116095	PLEKHA3	-0.511485	0.00246863	0.0494483
ENSG00000158470	B4GALT5	-0.511839	0.001273	0.0369454
ENSG00000172315	TP53RK	-0.512349	0.000511786	0.0258067
ENSG00000178996	SNX18	-0.513028	0.00175919	0.0432025
ENSG00000239305	RNF103	-0.515207	0.00207108	0.0467783
ENSG00000198604	BAZ1A	-0.515326	0.00103257	0.0331047
ENSG00000174106	LEMD3	-0.51679	0.00232177	0.0482965
ENSG00000164649	CDCA7L	-0.517219	0.00160889	0.0414439
ENSG00000135164	DMTF1	-0.517248	0.0019736	0.0460271
ENSG00000164023	SGMS2	-0.518786	0.000699479	0.0302514
ENSG00000004660	CAMKK1	-0.519759	0.00101719	0.0331047
ENSG00000163125	RPRD2	-0.521067	0.001592	0.041253
ENSG00000107362	ABHD17B	-0.521322	0.00119383	0.0356783
ENSG00000196787	H2AC11	-0.522104	0.0016479	0.0419524
ENSG00000107789	MINPP1	-0.523428	0.000700958	0.0302514
ENSG00000126953	TIMM8A	-0.523856	0.00147196	0.0397186
ENSG00000147650	LRP12	-0.528665	0.00195065	0.045849
ENSG00000144136	SLC20A1	-0.530918	0.001807	0.0438651
ENSG00000100297	MCM5	-0.532855	0.00246167	0.0493847
ENSG00000137504	CREBZF	-0.534671	0.000315308	0.0223654
ENSG00000099942	CRKL	-0.536373	0.000469591	0.0246299
ENSG00000173276	ZBTB21	-0.538324	0.0012971	0.0372208
ENSG00000117114	ADGRL2	-0.539432	0.0017306	0.0428062
ENSG00000175105	ZNF654	-0.539701	0.00200591	0.046266
ENSG00000108395	TRIM37	-0.540571	0.00103046	0.0331047
ENSG00000164045	CDC25A	-0.545132	0.000834628	0.0310256
ENSG00000141699	RETREG3	-0.545391	0.000996765	0.0330404
ENSG00000132819	RBM38	-0.547717	0.00232607	0.0482965
ENSG00000132773	TOE1	-0.5483	0.00148606	0.0398522
ENSG00000158615	PPP1R15B	-0.549513	0.000791128	0.0310256
ENSG00000173548	SNX33	-0.551985	0.00122931	0.0359973
ENSG00000170456	DENND5B	-0.55214	0.00157056	0.0408112
ENSG00000139620	KANSL2	-0.553061	0.000140843	0.0159017
ENSG00000172007	RAB33B	-0.554406	0.00212877	0.0471936
ENSG00000138381	ASNSD1	-0.556621	0.000589803	0.0283192
ENSG00000105643	ARRDC2	-0.557581	0.0025122	0.0497537
ENSG00000129521	EGLN3	-0.558094	0.00143043	0.0394204
ENSG00000117461	PIK3R3	-0.560904	0.000635381	0.0291161
ENSG00000131323	TRAF3	-0.562254	0.00112614	0.0343332
ENSG00000163428	LRRC58	-0.564431	0.000311786	0.0223654
ENSG00000082213	C5orf22	-0.565783	0.000342185	0.0225035
ENSG00000213380	COG8	-0.569325	0.000941481	0.0328763
ENSG00000179409	GEMIN4	-0.571006	0.000841993	0.0311514
ENSG00000116044	NFE2L2	-0.573536	0.000101613	0.0136085
ENSG00000166189	HPS6	-0.57382	0.000745171	0.0309208
ENSG00000118496	FBXO30	-0.574727	0.000486447	0.0250222
ENSG00000171574	ZNF584	-0.577293	0.00160469	0.0414176
ENSG00000109787	KLF3	-0.577916	0.00143072	0.0394204
ENSG00000154124	OTULIN	-0.579926	0.000806091	0.0310256
ENSG00000151748	SAV1	-0.581535	0.000409419	0.0237583
ENSG00000152684	PELO	-0.581557	0.00022152	0.0197438
ENSG00000100426	ZBED4	-0.58546	0.000675713	0.0301058
ENSG00000104142	VPS18	-0.585515	0.00166295	0.0420895
ENSG00000110218	PANX1	-0.587788	0.000293767	0.0214335
ENSG00000159216	RUNX1	-0.589707	0.00203266	0.0463859
ENSG00000184678	H2BC21	-0.592168	0.00145962	0.0394673
ENSG00000081019	RSBN1	-0.592449	0.00171286	0.0427315
ENSG00000176055	MBLAC2	-0.592601	0.00243255	0.0490507
ENSG00000185129	PURA	-0.593037	0.00043984	0.0243596
ENSG00000182810	DDX28	-0.595831	0.00121504	0.0357396
ENSG00000160570	DEDD2	-0.599232	0.0022082	0.0474815
ENSG00000166068	SPRED1	-0.600565	0.000946665	0.0329104
ENSG00000013441	CLK1	-0.603134	0.000650424	0.0295555
ENSG00000170677	SOCS6	-0.603302	0.0010189	0.0331047
ENSG00000073111	MCM2	-0.604942	4.07836e-05	0.00968425
ENSG00000129071	MBD4	-0.606556	0.000792058	0.0310256
ENSG00000177485	ZBTB33	-0.606617	0.00043139	0.0243596
ENSG00000144659	SLC25A38	-0.607614	0.000865592	0.0313155
ENSG00000130449	ZSWIM6	-0.608391	0.00220912	0.0474815
ENSG00000011198	ABHD5	-0.609174	0.000374379	0.0229389
ENSG00000148572	NRBF2	-0.609944	0.000623565	0.0287343
ENSG00000112715	VEGFA	-0.610315	0.000171348	0.0180468
ENSG00000198783	ZNF830	-0.611803	0.00213637	0.0471936
ENSG00000158985	CDC42SE2	-0.613578	0.000886921	0.0316095
ENSG00000100219	XBP1	-0.614636	3.1103e-05	0.00884671
ENSG00000197147	LRRC8B	-0.616857	0.00136896	0.038074
ENSG00000136940	PDCL	-0.617867	0.000292007	0.0214248
ENSG00000125875	TBC1D20	-0.618062	0.000778598	0.0310256
ENSG00000164284	GRPEL2	-0.618768	0.000319568	0.0223654
ENSG00000162607	USP1	-0.619235	0.000964503	0.0329104
ENSG00000177683	THAP5	-0.621916	0.0010998	0.0339248
ENSG00000074266	EED	-0.624902	0.000462599	0.0245591
ENSG00000135763	URB2	-0.625137	0.000325919	0.0225035
ENSG00000166123	GPT2	-0.625838	0.000725171	0.0305142
ENSG00000164442	CITED2	-0.627795	0.00037197	0.0229389
ENSG00000165572	KBTBD6	-0.629532	0.000682537	0.0302167
ENSG00000132002	DNAJB1	-0.633439	1.44582e-05	0.00787192
ENSG00000106608	URGCP	-0.633997	0.000433615	0.0243596
ENSG00000198743	SLC5A3	-0.635414	0.0012088	0.0356996
ENSG00000138376	BARD1	-0.638345	0.000606275	0.0286405
ENSG00000171488	LRRC8C	-0.639796	0.00219515	0.0474815
ENSG00000177971	IMP3	-0.640073	0.000245338	0.0202027
ENSG00000198355	PIM3	-0.64147	9.06364e-05	0.0130078
ENSG00000112200	ZNF451	-0.642853	0.00117174	0.0352601
ENSG00000151151	IPMK	-0.642973	0.000810868	0.0310256
ENSG00000146278	PNRC1	-0.644252	0.00205727	0.0466456
ENSG00000170312	CDK1	-0.645028	0.000429445	0.0243596
ENSG00000005483	KMT2E	-0.646122	0.00154614	0.0405473
ENSG00000138678	GPAT3	-0.647559	0.00119841	0.0356996
ENSG00000101412	E2F1	-0.64939	0.00101018	0.0331047
ENSG00000101624	CEP76	-0.649626	0.0012967	0.0372208
ENSG00000164542	KIAA0895	-0.653489	0.00222409	0.0476174
ENSG00000109381	ELF2	-0.65587	0.00135256	0.038074
ENSG00000164236	ANKRD33B	-0.656493	0.00102251	0.0331047
ENSG00000131873	CHSY1	-0.656547	0.000204099	0.0191724
ENSG00000110851	PRDM4	-0.656566	0.00201617	0.0462763
ENSG00000163950	SLBP	-0.656644	0.000111273	0.0143884
ENSG00000170468	RIOX1	-0.656756	0.000790224	0.0310256
ENSG00000121864	ZNF639	-0.657144	0.000284866	0.0210189
ENSG00000168264	IRF2BP2	-0.659001	0.00251357	0.0497537
ENSG00000205268	PDE7A	-0.659683	0.000856897	0.03126
ENSG00000164366	CCDC127	-0.659752	2.21336e-05	0.00862717
ENSG00000152464	RPP38	-0.660669	0.000952497	0.0329104
ENSG00000121931	LRIF1	-0.66202	0.000489095	0.0250222
ENSG00000088356	PDRG1	-0.663689	9.8807e-05	0.0134914
ENSG00000066230	SLC9A3	-0.667822	0.00120668	0.0356996
ENSG00000165782	PIP4P1	-0.670554	0.000367377	0.0229389
ENSG00000224531	SMIM13	-0.6709	0.000377336	0.0229389
ENSG00000178718	RPP25	-0.672229	0.000641997	0.0293164
ENSG00000170113	NIPA1	-0.676893	0.000825149	0.0310256
ENSG00000166886	NAB2	-0.677836	0.00203571	0.0463859
ENSG00000174652	ZNF266	-0.67967	0.000709836	0.0302514
ENSG00000096717	SIRT1	-0.680663	0.00072664	0.0305142
ENSG00000136826	KLF4	-0.683931	0.000339287	0.0225035
ENSG00000092470	WDR76	-0.684292	0.000853575	0.031226
ENSG00000155016	CYP2U1	-0.684487	0.00190257	0.0450136
ENSG00000142556	ZNF614	-0.691036	0.000836219	0.0310256
ENSG00000284024	LOC100421372	-0.694535	0.000275413	0.0208567
ENSG00000137040	RANBP6	-0.69707	9.47586e-05	0.0134516
ENSG00000177606	JUN	-0.699862	0.000321952	0.0223654
ENSG00000154370	TRIM11	-0.70234	0.000200329	0.0191724
ENSG00000181788	SIAH2	-0.703085	0.000191885	0.0190305
ENSG00000174013	FBXO45	-0.703766	0.000232986	0.0200184
ENSG00000139263	LRIG3	-0.705021	0.00242872	0.0490507
ENSG00000116761	CTH	-0.705203	0.000342894	0.0225035
ENSG00000114120	SLC25A36	-0.705293	7.22008e-05	0.0117584
ENSG00000047346	FAM214A	-0.707402	0.00228861	0.0482259
ENSG00000164535	DAGLB	-0.710339	0.000255489	0.0204823
ENSG00000165527	ARF6	-0.71661	4.5421e-05	0.00993977
ENSG00000147852	VLDLR	-0.718785	0.000970263	0.0329104
ENSG00000170871	KIAA0232	-0.720072	0.00193482	0.0456114
ENSG00000187866	PABIR1	-0.721341	0.00195543	0.045849
ENSG00000189060	H1-0	-0.724038	0.00124824	0.0364698
ENSG00000196470	SIAH1	-0.724043	0.000265773	0.0206607
ENSG00000163686	ABHD6	-0.724894	0.000467774	0.0246299
ENSG00000111877	MCM9	-0.725558	0.000762354	0.0310256
ENSG00000214367	HAUS3	-0.730413	0.00105854	0.0332749
ENSG00000173166	RAPH1	-0.731236	0.00152959	0.0402538
ENSG00000025156	HSF2	-0.735114	0.00201218	0.046266
ENSG00000127337	YEATS4	-0.735833	0.00041267	0.0237583
ENSG00000253719	ATXN7L3B	-0.736659	0.000130519	0.0156837
ENSG00000164823	OSGIN2	-0.741325	0.000193802	0.0190305
ENSG00000183161	FANCF	-0.749454	0.00182379	0.0440042
ENSG00000143476	DTL	-0.750778	0.000301517	0.0218768
ENSG00000132646	PCNA	-0.753514	3.11599e-05	0.00884671
ENSG00000141582	CBX4	-0.753723	0.000808846	0.0310256
ENSG00000169188	APEX2	-0.755166	0.000967808	0.0329104
ENSG00000174738	NR1D2	-0.755732	5.41703e-05	0.0114107
ENSG00000178966	RMI1	-0.756701	0.000386155	0.0230021
ENSG00000138061	CYP1B1	-0.757611	3.48335e-06	0.00607165
ENSG00000181751	MACIR	-0.758015	0.000773671	0.0310256
ENSG00000147894	C9orf72	-0.758668	0.00175174	0.0432025
ENSG00000165152	PGAP4	-0.762483	0.000693627	0.0302514
ENSG00000076003	MCM6	-0.762799	0.000210452	0.0193557
ENSG00000166002	SMCO4	-0.763208	0.000620163	0.028721
ENSG00000167840	ZNF232	-0.764275	0.00122775	0.0359973
ENSG00000130193	THEM6	-0.770786	0.000872805	0.0313155
ENSG00000142871	CCN1	-0.780814	0.000490481	0.0250222
ENSG00000265972	TXNIP	-0.781549	0.000102811	0.0136085
ENSG00000187837	H1-2	-0.782576	0.00065176	0.0295555
ENSG00000136603	SKIL	-0.782797	0.000137877	0.0157953
ENSG00000170802	FOXN2	-0.784778	0.000193629	0.0190305
ENSG00000180611	MB21D2	-0.786737	0.00240404	0.0489809
ENSG00000112029	FBXO5	-0.78769	0.000792521	0.0310256
ENSG00000125352	RNF113A	-0.787851	8.14006e-05	0.0122195
ENSG00000162772	ATF3	-0.78943	0.000245959	0.0202027
ENSG00000204604	ZNF468	-0.790031	0.00036804	0.0229389
ENSG00000153922	CHD1	-0.795234	0.00178212	0.0435394
ENSG00000152778	IFIT5	-0.798296	0.00217343	0.0474665
ENSG00000105732	ZNF574	-0.799107	0.00169227	0.0425151
ENSG00000124279	FASTKD3	-0.800488	0.000147537	0.0163291
ENSG00000140015	KCNH5	-0.801196	0.0022138	0.0474815
ENSG00000151093	OXSM	-0.801517	0.000228618	0.019905
ENSG00000166822	TMEM170A	-0.804557	0.00048818	0.0250222
ENSG00000184436	THAP7	-0.806091	0.00106513	0.0332789
ENSG00000172059	KLF11	-0.816176	0.0010623	0.0332749
ENSG00000157601	MX1	-0.827962	0.00214254	0.0471936
ENSG00000164169	PRMT9	-0.832465	0.000755605	0.0310256
ENSG00000181744	DIPK2A	-0.83374	0.000351443	0.0226364
ENSG00000168806	LCMT2	-0.836423	5.94155e-05	0.0115908
ENSG00000165244	ZNF367	-0.837025	5.76608e-05	0.0115854
ENSG00000176396	EID2	-0.838194	0.000175319	0.0183173
ENSG00000120616	EPC1	-0.838508	0.00012466	0.0153591
ENSG00000118762	PKD2	-0.842426	0.0019701	0.0460271
ENSG00000155545	MIER3	-0.845152	7.49206e-05	0.0118165
ENSG00000171617	ENC1	-0.849986	0.00069741	0.0302514
ENSG00000119669	IRF2BPL	-0.850384	0.000982095	0.0329104
ENSG00000125968	ID1	-0.857271	2.92829e-05	0.00884671
ENSG00000134259	NGF	-0.861836	0.000953814	0.0329104
ENSG00000048405	ZNF800	-0.863059	0.00130219	0.0372208
ENSG00000119938	PPP1R3C	-0.866912	0.000830823	0.0310256
ENSG00000196371	FUT4	-0.867167	0.000787979	0.0310256
ENSG00000226065	ZBTB45P2	-0.870288	0.00180211	0.0438278
ENSG00000169018	FEM1B	-0.87215	4.40281e-06	0.00607165
ENSG00000277462	ZNF670	-0.872801	0.000931168	0.0326034
ENSG00000119138	KLF9	-0.873762	0.000195364	0.0190407
ENSG00000154734	ADAMTS1	-0.87663	0.00100806	0.0331047
ENSG00000152193	OBI1	-0.877134	0.000137604	0.0157953
ENSG00000187257	RSBN1L	-0.880323	0.000962766	0.0329104
ENSG00000198948	MFAP3L	-0.885845	0.00242742	0.0490507
ENSG00000114796	KLHL24	-0.888877	0.000531346	0.0266113
ENSG00000184277	TM2D3	-0.888893	0.000336509	0.0225035
ENSG00000138767	CNOT6L	-0.889701	0.00036284	0.0229389
ENSG00000175895	PLEKHF2	-0.892908	0.000133121	0.0156837
ENSG00000126804	ZBTB1	-0.895681	0.00020605	0.0191724
ENSG00000007372	PAX6	-0.900951	0.00060746	0.0286405
ENSG00000177426	TGIF1	-0.90544	1.04874e-05	0.00622569
ENSG00000005073	HOXA11	-0.917557	0.00200321	0.046266
ENSG00000183808	RBM12B	-0.918415	0.000133931	0.0156837
ENSG00000134294	SLC38A2	-0.92103	1.51885e-05	0.00790062
ENSG00000197024	ZNF398	-0.925708	0.000707897	0.0302514
ENSG00000181467	RAP2B	-0.931506	7.60022e-05	0.0118165
ENSG00000143479	DYRK3	-0.932155	8.58073e-05	0.0127346
ENSG00000120696	KBTBD7	-0.934036	0.00022495	0.0198503
ENSG00000148926	ADM	-0.935256	1.01953e-05	0.00622569
ENSG00000019549	SNAI2	-0.935748	0.000411015	0.0237583
ENSG00000247315	ZCCHC3	-0.939128	0.000167271	0.0177868
ENSG00000152804	HHEX	-0.940099	0.000565206	0.0278148
ENSG00000168301	KCTD6	-0.94013	0.00080136	0.0310256
ENSG00000157240	FZD1	-0.94132	0.00092456	0.0324635
ENSG00000100483	VCPKMT	-0.946488	0.00101488	0.0331047
ENSG00000152409	JMY	-0.947354	0.00100591	0.0331047
ENSG00000113369	ARRDC3	-0.948062	3.10552e-05	0.00884671
ENSG00000134107	BHLHE40	-0.948555	0.000447339	0.0243596
ENSG00000135604	STX11	-0.951604	0.000750051	0.0309208
ENSG00000163961	RNF168	-0.951759	0.00102125	0.0331047
ENSG00000168040	FADD	-0.952929	0.000142458	0.0159017
ENSG00000284194	SCO2	-0.964948	7.59727e-05	0.0118165
ENSG00000135245	HILPDA	-0.965094	0.000616279	0.028721
ENSG00000144802	NFKBIZ	-0.967441	0.00211849	0.0471936
ENSG00000180447	GAS1	-0.972934	3.66321e-05	0.00952038
ENSG00000183496	MEX3B	-0.972963	0.00229618	0.0482315
ENSG00000132661	NXT1	-0.97778	0.000221299	0.0197438
ENSG00000170191	NANP	-0.978872	0.00248329	0.0495141
ENSG00000176697	BDNF	-0.980781	2.44414e-05	0.00862717
ENSG00000138166	DUSP5	-0.988304	0.000882825	0.0315882
ENSG00000155090	KLF10	-0.997626	4.49265e-06	0.00607165
ENSG00000128590	DNAJB9	-1.00021	5.56602e-06	0.00607165
ENSG00000049130	KITLG	-1.00237	0.0001345	0.0156837
ENSG00000121671	CRY2	-1.00855	0.00172454	0.0427372
ENSG00000124766	SOX4	-1.00926	4.18533e-05	0.00976079
ENSG00000144355	DLX1	-1.01594	8.9204e-05	0.0129445
ENSG00000080546	SESN1	-1.01712	0.000597377	0.0285483
ENSG00000118515	SGK1	-1.01886	9.9171e-05	0.0134914
ENSG00000101138	CSTF1	-1.02423	5.57885e-06	0.00607165
ENSG00000173846	PLK3	-1.02992	0.000450866	0.0243596
ENSG00000016082	ISL1	-1.03696	0.00166219	0.0420895
ENSG00000170989	S1PR1	-1.04805	0.0024405	0.0490507
ENSG00000181274	FRAT2	-1.05308	0.000237641	0.0200232
ENSG00000198945	L3MBTL3	-1.05929	0.00169605	0.0425151
ENSG00000163788	SNRK	-1.0607	0.000613842	0.028721
ENSG00000105173	CCNE1	-1.06764	0.000613345	0.028721
ENSG00000166900	STX3	-1.07232	2.54503e-05	0.00869568
ENSG00000165891	E2F7	-1.07241	0.00108313	0.0336802
ENSG00000118655	DCLRE1B	-1.07651	0.000116168	0.0146666
ENSG00000116903	EXOC8	-1.07962	8.7007e-05	0.0127675
ENSG00000172731	LRRC20	-1.0799	0.0016326	0.0417255
ENSG00000073756	PTGS2	-1.08421	0.000833473	0.0310256
ENSG00000247626	MARS2	-1.09691	1.77262e-05	0.00798292
ENSG00000125347	IRF1	-1.10081	0.000189843	0.0190305
ENSG00000112365	ZBTB24	-1.10134	0.000983642	0.0329104
ENSG00000213799	ZNF845	-1.1095	0.000256735	0.0204823
ENSG00000136997	MYC	-1.1099	6.97762e-05	0.0117584
ENSG00000163660	CCNL1	-1.11024	6.43521e-05	0.0117584
ENSG00000149308	NPAT	-1.11294	0.000583839	0.0281363
ENSG00000168564	CDKN2AIP	-1.12009	6.54513e-06	0.00610567
ENSG00000151233	GXYLT1	-1.12454	0.000228298	0.019905
ENSG00000165655	ZNF503	-1.12623	0.00027679	0.0208567
ENSG00000186767	SPIN4	-1.13445	0.000571021	0.0278266
ENSG00000162413	KLHL21	-1.13481	4.47975e-05	0.00993977
ENSG00000145365	TIFA	-1.13619	5.71262e-05	0.0115854
ENSG00000198841	KTI12	-1.13918	4.18647e-06	0.00607165
ENSG00000130522	JUND	-1.14182	0.00045203	0.0243596
ENSG00000163659	TIPARP	-1.14569	2.86752e-05	0.00884671
ENSG00000224287	MSL3P1	-1.1496	0.000129066	0.0156837
ENSG00000100292	HMOX1	-1.15442	0.000539316	0.0268835
ENSG00000154040	CABYR	-1.16772	0.000851696	0.031226
ENSG00000099860	GADD45B	-1.17888	0.000151833	0.0165245
ENSG00000120875	DUSP4	-1.18343	0.000583675	0.0281363
ENSG00000162783	IER5	-1.18479	1.4466e-05	0.00787192
ENSG00000205189	ZBTB10	-1.18514	0.000960103	0.0329104
ENSG00000184557	SOCS3	-1.18942	0.000328616	0.0225035
ENSG00000115738	ID2	-1.20611	2.4024e-05	0.00862717
ENSG00000228409	CCT6P1	-1.20662	0.000190782	0.0190305
ENSG00000120129	DUSP1	-1.22442	3.5098e-05	0.00952038
ENSG00000164296	TIGD6	-1.23029	0.000435778	0.0243596
ENSG00000158050	DUSP2	-1.24236	6.21662e-05	0.0117584
ENSG00000112773	TENT5A	-1.24828	7.18168e-05	0.0117584
ENSG00000100906	NFKBIA	-1.24922	0.000222231	0.0197438
ENSG00000174579	MSL2	-1.25359	0.000123612	0.0153591
ENSG00000185220	PGBD2	-1.27441	0.00224995	0.0477794
ENSG00000174136	RGMB	-1.28056	0.000281933	0.0209289
ENSG00000176842	IRX5	-1.28094	0.000734053	0.0306285
ENSG00000170345	FOS	-1.29902	8.66043e-07	0.00559844
ENSG00000272196	NA	-1.31674	1.67128e-05	0.00790062
ENSG00000095739	BAMBI	-1.34406	0.000379387	0.0229389
ENSG00000100647	SUSD6	-1.35624	0.000217547	0.0197303
ENSG00000221869	CEBPD	-1.36875	0.000256488	0.0204823
ENSG00000165030	NFIL3	-1.36939	1.0251e-05	0.00622569
ENSG00000180257	ZNF816	-1.4015	0.000334227	0.0225035
ENSG00000173334	TRIB1	-1.40467	0.000448044	0.0243596
ENSG00000169242	EFNA1	-1.41876	0.000213875	0.0195329
ENSG00000189057	FAM111B	-1.42667	0.000712789	0.0302514
ENSG00000170836	PPM1D	-1.42769	9.79779e-06	0.00622569
ENSG00000198081	ZBTB14	-1.44478	5.71436e-05	0.0115854
ENSG00000282988	RP1-34B20.21	-1.44744	0.00104044	0.0331047
ENSG00000168209	DDIT4	-1.47117	0.000321384	0.0223654
ENSG00000125266	EFNB2	-1.4856	8.62133e-06	0.00622569
ENSG00000132825	PPP1R3D	-1.52075	0.000241826	0.0201163
ENSG00000175305	CCNE2	-1.522	6.39812e-06	0.00610567
ENSG00000078401	EDN1	-1.52866	0.000264863	0.0206607
ENSG00000153094	BCL2L11	-1.53252	2.38154e-05	0.00862717
ENSG00000188483	IER5L	-1.54024	0.000542547	0.0269417
ENSG00000176399	DMRTA1	-1.55131	7.73216e-06	0.00622569
ENSG00000124171	PARD6B	-1.55667	0.000438483	0.0243596
ENSG00000183691	NOG	-1.57191	3.67503e-05	0.00952038
ENSG00000185252	ZNF74	-1.58745	0.00230946	0.0482965
ENSG00000143333	RGS16	-1.67051	0.001498	0.0399071
ENSG00000136158	SPRY2	-1.67064	0.000260701	0.0206119
ENSG00000251493	FOXD1	-1.89208	0.000889813	0.0316095
ENSG00000125944	HNRNPR	-1.90706	1.61458e-05	0.00790062
ENSG00000128965	CHAC1	-2.04841	0.000531818	0.0266113
ENSG00000139318	DUSP6	-2.11995	0.000496688	0.0252403
ENSG00000173110	HSPA6	-3.8213	0.00042016	0.0240671
ENSG00000171570	RAB4B-EGLN2	-3.8571	0.00137029	0.038074
ENSG00000180921	FAM83H	-3.90608	0.00182621	0.0440042
ENSG00000256664	RSL24D1	-6.94042	0.000985296	0.0329104
ENSG00000253203	GUSBP3	-7.08439	0.000807318	0.0310256
ENSG00000274419	TBC1D3D	-8.14182	0.000167517	0.0177868
